# The contribution of de novo coding mutations to meningocele

Yoo-Jin Ha<sup>1,2,3</sup>, Isaac Tang<sup>1,2</sup>, Ashna Nisal<sup>1,2</sup>, Ishani Jhamb<sup>1,2</sup>, Cassidy Wallace<sup>1,2</sup>, Sarah Schroeder<sup>1,2</sup>, Chanjae Lee<sup>4</sup>, Keng loi Vong<sup>1,2</sup>, Naomi Meave<sup>1,2</sup>, Fiza Jiwani<sup>1,2</sup>, Chelsea Barrows<sup>1,2</sup>, Sangmoon Lee<sup>1,2</sup>, Nan Jiang<sup>1,2</sup>, Arzoo Patel<sup>1,2</sup>, Francisco A. Blanco<sup>5</sup>, Seyoung Yu<sup>6</sup>, Hui Su Jeong<sup>1,2,7</sup>, Isaac Plutzer<sup>8</sup>, Michael B. Major<sup>8</sup>, Béatrice Benoit<sup>9</sup>, Christian Poüs<sup>9,10</sup>, Caleb Heffner<sup>11</sup>, Zoha Kibar<sup>12</sup>, Gyang Markus Bot<sup>13</sup>, Hope Northrup<sup>14</sup>, Kit Sing Au<sup>14</sup>, Madison Strain<sup>15</sup>, Allison Ashley-Koch<sup>15</sup>, Richard H. Finnell<sup>16</sup>, Joan T. Le<sup>17</sup>, Hal Meltzer<sup>17</sup>, Camila Araujo<sup>18</sup>, Helio R. Machado<sup>18</sup>, Roger E. Stevenson<sup>19</sup>, Anna Yurrita<sup>20</sup>, Sara Mumtaz<sup>21</sup>, Osvaldo M. Mutchinick<sup>22</sup>, José Ramón Medina-Bereciartu<sup>23</sup>, Friedhelm Hildebrandt<sup>24</sup>, Gia Melikishvili<sup>25</sup>, Rony Marwan<sup>26</sup>, Valeria Capra<sup>27</sup>, Mahmoud M. Nourdeen<sup>28</sup>, Aida M.S. Salem<sup>28</sup>, Mahmoud Y. Issa<sup>29</sup>, Maha S. Zaki<sup>29</sup>, Ji Eun Lee<sup>7</sup>, Anna Alkelai<sup>30</sup>, Alan R. Shuldiner<sup>30</sup>, Stephen F. Kingsmore<sup>1</sup>, Stephen A. Murray<sup>11</sup>, Heon Yung Gee<sup>6</sup>, W. Todd Miller<sup>31,32</sup>, Kimberley F. Tolias<sup>5</sup>, John B. Wallingford<sup>4</sup>, Spina Bifida Sequencing Consortium\*<sup>^</sup>, Sangwoo Kim<sup>3, #</sup>, Joseph G. Gleeson<sup>1,2, #<sup>^</sup></sup>

<sup>1</sup> Rady Children's Institute for Genomic Medicine, San Diego, CA 92123, USA

<sup>2</sup> Department of Neurosciences and Pediatrics, University of California, San Diego, CA 92037, USA

<sup>3</sup> Department of Biomedical Systems Informatics and Graduate School of Medical Science, Brain Korea 21 Project, Yonsei University College of Medicine, Seoul 03722, Republic of Korea

<sup>4</sup> Dept. of Molecular Biosciences, University of Texas at Austin, Austin, TX 78712, USA

<sup>5</sup> Dept. Neuroscience, Biochemistry and Molecular Biology, Baylor College of Medicine, Houston, TX 77030, USA

<sup>6</sup> Department of Pharmacology and Graduate School of Medical Science, Brain Korea 21 Project, Yonsei University College of Medicine, Seoul 03722, Republic of Korea

<sup>7</sup> Department of Health Sciences and Technology, SAIHST, Sungkyunkwan University, Seoul 06351, Republic of Korea

<sup>8</sup> Department of Cell Biology and Physiology, Washington University in St. Louis, MO 63110

<sup>9</sup> INSERM UMR-S 1193, UFR de Pharmacie, University Paris-Saclay, UFR de Pharmacie, Orsay 91400, France.

<sup>10</sup> Biochimie-Hormonologie, Assistance Publique - Hôpitaux de Paris Université Paris-Saclay, Clamart 92140, France

<sup>11</sup> The Jackson Laboratory, Bar Harbor, ME 04609, USA

<sup>12</sup> Department of Neurosciences, Research Center of CHU Sainte Justine, University of Montreal, Montreal, H3T 1C5, Canada

<sup>13</sup> Neurosurgery Division, Department of Surgery, Jos University Teaching Hospital, Jos 930103, Nigeria

<sup>14</sup> Department of Pediatrics, McGovern Medical School at the University of Texas Health Science Center at Houston and Children's Memorial Hermann Hospital, Houston, TX 77030, USA

<sup>15</sup> Molecular Physiology Institute, Duke University Medical Center, Durham, NC 27710, USA

<sup>16</sup> Center for Precision Environmental Health, Departments of Molecular and Human Genetics, Molecular and Cellular Biology and Medicine, Baylor College of Medicine, Houston 77030, TX, USA

<sup>17</sup> Rady Children's Hospital, San Diego, CA 92123, USA

49 <sup>18</sup> Department of Surgery and Anatomy Ribeirão Preto Medical School University of São Paulo,  
50 Ribeirao Preto SP 14015-068, Brazil

51 <sup>19</sup> J.C. Self Research Institute of Human Genetics, Greenwood Genetic Center, Greenwood, SC  
52 29646, USA

53 <sup>20</sup> Catedrática de Ciencias Ómicas, Facultad de Medicina, Universidad Francisco Marroquín,  
54 01001, Guatemala

55 <sup>21</sup> National University of Medical Sciences, Rawalpindi 44000, Pakistan

56 <sup>22</sup> Department of Genetics, Instituto Nacional de Ciencias Médicas y Nutrición Salvador Zubirán,  
57 Mexico City 14080, Mexico

58 <sup>23</sup> Clínica Santa Sofia, Caracas 1061, Venezuela

59 <sup>24</sup> Division of Nephrology, Boston Children's Hospital, Boston, MA 02115, USA

60 <sup>25</sup> Department of Pediatrics, MediClubGeorgia Medical Center, Tbilisi, 0160, Georgia

61 <sup>26</sup> Division of Pediatric Surgery, University of Colorado School of Medicine, Children's Hospital  
62 of Colorado, Colorado Fetal Care Center, Aurora, CO, 80045, USA

63 <sup>27</sup> Genomics and Clinical Genetics Unit, IRCCS Istituto Giannina Gaslini, Genoa 16147, Italy

64 <sup>28</sup> Department of Pediatrics, Faculty of Medicine, Beni-Suef University, Beni-Suef 62521, Egypt

65 <sup>29</sup> Clinical Genetics Department, Human Genetics and Genome Research Division, National  
66 Research Centre, Cairo 12311, Egypt

67 <sup>30</sup> Regeneron Genetics Center, Tarrytown, NY 10591, USA

68 <sup>31</sup> Department of Physiology and Biophysics, Stony Brook University, Stony Brook, NY 11794,  
69 USA

70 <sup>32</sup> VA Medical Center, Northport, NY 11768, USA

71

72 # Co-corresponding authors

73 \*Consortium membership in appendix

74 ^ Contact PI for consortium: Joseph G. Gleeson

75 Keywords: Meningomyelocele, spina bifida, neural tube defect, de novo mutation, penetrance,  
76 expressivity, trio, exome, protein-interaction network, congenital, hydrocephalus.

77 Abstract word count: 158

78 Text word Count: 2877

79 Number of Figures: 4

80 Number of Tables: 1

81 Number of Supplementary Figures: 16

82

83

## 84 **Abstract**

85 Meningocele (MM) is considered a genetically complex disease resulting from  
86 failure of neural tube closure (NTD). Patients display neuromotor disability and frequent  
87 hydrocephalus requiring ventricular shunting. A few proposed genes contribute to disease  
88 susceptibility, but most risk remains unexplained<sup>1</sup>. We postulated that de novo mutations  
89 (DNMs) under purifying selection contribute to MM risk<sup>2</sup>. Here we recruited a cohort of  
90 851 MM trios requiring shunting at birth, compared with 732 control trios, and found that  
91 de novo likely gene disrupting or damaging missense mutations occur in approximately  
92 22.3% of subjects, 28% of which are estimated to contribute to disease risk. The 187  
93 genes with damaging DNMs collectively define networks including actin cytoskeleton  
94 and microtubule-based processes, axon guidance, and histone modification. Gene  
95 validation demonstrates partial or complete loss of function, impaired signaling and  
96 defective neural tube closure in *Xenopus* embryos. Our results suggest DNMs make key  
97 contributions to MM risk, and highlight critical pathways required for neural tube closure  
98 in human embryogenesis.  
99

## 100 **Main**

101 MM, also known as spina bifida, is the most common central nervous system  
102 (CNS) structural defect in humans. MM results from failed closure of the neural tube in  
103 the first six weeks of gestation. While folic acid supplementation has reduced disease  
104 burden<sup>3</sup>, the incidence of 1:3000–10,000 live-births, along with the associated lifelong  
105 neuromotor disability and increased mortality, has focused attention on this condition.  
106 Timely diagnosis allows for prenatal counseling and informed management choices,  
107 including termination of pregnancy, fetal surgery, or postnatal surgery for the nearly fully  
108 concordant hydrocephalus accompanying the hindbrain Chiari type II malformation<sup>4,5</sup>.  
109 Over 20 million people worldwide live with an NTD yet causes remain poorly defined.

110 Mouse knockout studies established hundreds of genes associated with NTD,  
111 often with partial penetrance, implicating apical-basal polarity, Wnt/PCP, Wnt/beta-  
112 catenin, and DNA transcription pathways<sup>6</sup>. Despite epidemiological heritability estimates  
113 of 60-70% for NTDs<sup>7</sup>, few genes are implicated in human NTDs, potentially due to  
114 genetic heterogeneity. Additive effects of common SNPs have been proposed, especially  
115 in the folate metabolism gene *MTHFR* (C677T, p.Ala222Val), but meta-analysis from 22  
116 different association studies suggest only a modest risk (OR 1.23, 95% CI: 1.07–1.42)<sup>8</sup>.  
117 Inherited mutations in *VANGLI2*, *TBXT*, *CCL2*, *CELSR1* were identified in cohort  
118 studies<sup>9-12</sup>, but represent only a few percent of cases. Prior successes in de novo mutation  
119 (DNM) approaches in conditions like autism and congenital heart disease, where  
120 mutations are potentially under purifying selection<sup>13,14</sup>, prompted a trio approach in 43  
121 families, identifying recurrent mutations in *SHROOM3*<sup>15</sup>, but left unanswered whether  
122 larger studies would be better powered.  
123

## 124 **Establishing the Spina Bifida Sequencing Consortium**

125 A critical step in DNM discovery is assessment for an excess burden of damaging  
126 mutations in cases vs. controls<sup>13</sup>. With the conservative assumptions of a modest increase  
127 in damaging DNMs in cases and estimating perhaps 50–100 total MM genetic risk loci,  
128 we calculated that a cohort of 300–500 trios would be required to identify 5–10  
129 recurrently mutated genes (see **Supplementary Information** and **Extended Data Fig.**

130 1). In 2015, we thus established the Spina Bifida Sequencing Consortium (SBSC) to  
131 aggregate prior CDC (Centers for Disease Control and Prevention, USA)-supported trio  
132 recruitment efforts, alongside targeted new recruitment from specialists in more than 12  
133 countries, and through social media outreach. Recruitment was limited to diagnosis of  
134 MM probands with open neural tissue observed at birth and hydrocephalus requiring  
135 shunting, specifying the most severe form of MM compatible with long term survival  
136 (**Methods**). Our ethnically diverse cohort was designed specifically to assess risk from  
137 DNMs using trio sequencing, matched with 732 control trios from the Simons Simplex  
138 Collection<sup>16</sup>. After five years of recruitment, we had enrolled 325 trios, performed trio  
139 whole exome sequencing (WES) and DNM analysis, but found no recurrently mutated  
140 genes, so we extended the recruitment timeline for an additional five years, to double the  
141 cohort size.

142 After 10 years of recruitment, we assembled a cohort of 851 MM trios (839 trios  
143 and 6 quartets) consisting of exome sequence data of 2,541 individuals. SBSC was  
144 populated by 15 different worldwide sites, incorporating both historic CDC-assembled  
145 cohorts and an aggregated earlier report of 39 NTD trios (35 trios and 2 quartets)<sup>15</sup>.

#### 147 **Excessive damaging DNM burden in MM trios**

148 After a series of strict quality controls and kinship analyses applied to trio exomes, we  
149 constructed a high-confidence call set of 2,592 DNMs (1,458 from 777 MM trios, and  
150 1,134 from 725 control trios) (**Methods**), and confirmed strong DNM signatures<sup>17</sup>  
151 (**Extended Data Fig. 2a–2b**). The rates of the total and functionally categorized DNMs  
152 (LGD: likely gene disrupting, D-Mis: damaging missense, tolerant missense, and  
153 synonymous) were calculated for the jointly covered consensus regions (**Fig. 1a**),  
154 wherein total DNM rates lie in a Poisson distribution (**Extended Data Fig. 2c–2d**,  
155 **Methods**). The average mutation rates of total DNMs were  $1.22 \times 10^{-8}$  ( $1.13 \times 10^{-8}$ – $1.31$   
156  $\times 10^{-8}$ , 95% CI) in MM and  $1.18 \times 10^{-8}$  ( $1.09 \times 10^{-8}$ – $1.28 \times 10^{-8}$ , 95% CI) in controls,  
157 which did not differ significantly (**Extended Data Fig. 2e**, Wilcoxon rank-sum test  $P$   
158 value: 0.56), and were also comparable to the rates from previous studies ( $1.08 \times 10^{-8}$ –  
159  $1.32 \times 10^{-8}$ )<sup>18,19</sup>.

160 In contrast, we observed an excessive rate of LGD DNMs (frameshift Indels,  
161 stop-gained, and splice donor/acceptor mutations) in MM ( $1.2 \times 10^{-9}$ ) compared to  
162 controls ( $5.0 \times 10^{-10}$ ) (**Fig. 1b**), with a ratio of the two Poisson rates (or rate ratio)<sup>20</sup> of  
163 2.10 ( $P$  value:  $9.0 \times 10^{-6}$ ). Case-control comparison of DNM rate per proband (i.e.  
164 theoretical rate: 0.12 in MM vs. 0.05 in controls, see **Methods**), suggested that 7.2%  
165 (95% CI: 2.96%–11.36%) of MM probands display LGD DNM implicated in MM risk  
166 (**Table 1**). Based upon the excessive burden, approximately 52.43% of LGD DNMs in  
167 MM probands was estimated to contribute to MM risk (**Methods**), comparable with rates  
168 in other complex diseases such as Tourette (~51.3%) and autism spectrum disorders  
169 (~42%)<sup>13,21</sup>. When LGD DNMs were considered alongside D-Mis DNMs (i.e. LGD + D-  
170 Mis; referred to as ‘damaging DNMs’), 28.26% (95% CI: 7.75%–48.76%) were linked to  
171 MM risk with excessive burden. Of note, a subset of high confidence D-Mis DNMs  
172 (referred to as ‘D-Mis-HC’) based upon pathogenicity prediction, conferred  
173 approximately 80% of the total LGD risk burden (rate ratio: 1.86,  $P$  value:  $2.0 \times 10^{-6}$ ).  
174 Paternal and maternal ages, expected to be correlated with DNM occurrence<sup>22,23</sup>, were not

175 correlated with the excessive DNMs burden (**Extended Data Fig. 3a**). Moreover, there  
176 was no enrichment in tolerant and synonymous missense DNMs.

177 In 3,060 genes considered to be highly constrained (i.e. the probability of loss-of-  
178 function intolerance:  $pLI \geq 0.9$ ), the burden of D-Mis DNMs appeared even more  
179 significant (rate ratio: 2.10,  $P = 0.003$ ) (**Fig. 1c**). Furthermore, we observed a  
180 substantially increased burden of D-Mis-HC DNMs (rate ratio: 7.7,  $P = 0.002$ ). This  
181 contrasts with the DNM contributions of other complex diseases, where LGDs play  
182 outsized roles compared with D-Mis DNMs<sup>13</sup>.

183 To assess whether there is major missed heritability using WES compared with  
184 whole genome sequencing (WGS), we recruited an additional 101 trios and 1 quartet, and  
185 performed WGS using standard discovery pipelines (**Methods**). We identified non-  
186 recurrent de novo SNV/Indels at expected rates of  $1.72 \times 10^{-8}$  (vs.  $1.2 \times 10^{-8}$ – $2.4 \times 10^{-8}$  in  
187 previous publications<sup>19,24</sup>, see **Extended Data Table 1**), encompassing 9 putative splice-  
188 disrupting and 41 in putative enhancer/promoter regions (**Supplementary Data**). Copy  
189 number variant (CNV) analysis revealed two nonrecurrent deletions and two duplications  
190 ( $> 100\text{kb}$ ), a rate comparable to other complex diseases<sup>25,26</sup> (**Extended Data Fig. 3b** and  
191 **Extended Data Table 2**). De novo inversions or translocations were not observed. In  
192 contrast, a high LGD rate (0.13 per proband) in coding region was replicated in WGS,  
193 with three overlapping genes observed in the WES cohort (*KDM1A*, *ITPR3*, and  
194 *GRHL2*). Overall, WGS-based analysis mirrored the findings from WES and did not  
195 identify an additional major class of mutation (see **Supplementary Information**).

196

### 197 **Functional convergence of DNM genes in MM**

198 Out of 198 damaging DNMs (82 LGD and 116 D-Mis) found in MM trios, Sanger  
199 sequencing was conducted in 86% (170 out of 198) where sufficient DNA was available,  
200 yielding 96.5% validation rate, which removed six false DNMs. The remaining 192  
201 damaging DNMs (79 LGD and 113 D-Mis) occurred in 187 unique genes, with only five  
202 genes mutated in two separate trios (referred to as ‘doubleton’; *PAX3*, *IRS1*, *ZSWIM6*,  
203 *BRSK2*, and *VWA8*) (**Fig. 2a** and **Supplementary Data**). Notably, only *PAX3* was  
204 previously implicated in human NTDs<sup>15,27</sup>. Among genes identified as singletons, only  
205 *TBXT* (splice donor) and *CELSR1* (frameshift) were previously implicated as inherited  
206 NTD risk factors<sup>9,11</sup>. The lack of additional recurrently mutated genes underscores a  
207 significant gap in our current understanding of MM genetic risk factors.

208 Spatial transcriptomic analysis of 36 of the damaging DNM genes confirmed  
209 expression at mouse embryonic day 10.5 coinciding with neural tube closure (MERFISH,  
210 see **Methods**, **Extended Data Fig. 4**). We found that most genes were expressed broadly  
211 in the embryo (86%, 31 out of 36), but a minority (14%) showed some cell type specific  
212 expression such as *Celsr1* in neural progenitors and *Stab1* in neural crest progenitors  
213 (**Extended Data Fig. 5**, **Supplementary Information**).

214 We next studied the protein interactions of MM DNM genes using the STRING  
215 database<sup>28</sup> (**Fig. 2b**). Among the 187 genes, 107 (57%) including 4 doubletons, 33 LGDs,  
216 and 74 D-Mis were highly interconnected, compared to controls (38% interconnected)  
217 (**Extended Data Fig. 6**). Bootstrap analysis confirmed a significantly greater degree of  
218 network colocalization than genes in the control group (**Fig. 2c**, **Methods**, two-sided  
219 Wilcoxon rank-sum test,  $P$  value  $< 1.0 \times 10^{-16}$ ). Genes exhibiting a higher node degree ( $n$   
220  $\geq 6$ ) were predominantly observed in the MM gene set (Wilcoxon rank-sum test, one-

221 sided) (**Fig. 2d**). Indeed, MM DNM genes were significantly enriched in biological  
222 pathways such as morphogenesis of polarized epithelium, neuronal cell adhesion, neural  
223 tube closure, and signal transduction (Gene Ontology biological processes, adjusted  $P$   
224 values  $< 0.05$ ) (**Fig. 2e and Extended Data Table 3**), suggesting functional convergence  
225 in neural tube closure.

226

### 227 **DNMs implicate functional modules in neural tube closure**

228 Using the 187 MM DNM genes as seeds, we employed network propagation to construct  
229 a comprehensive gene network associated with human MM risk (**Extended Data Fig. 7**,  
230 see **Methods**)<sup>29</sup>, by implicating functionally related genes that might not be directly  
231 observable in patients due to, for instance, lethal mutations. The propagated network  
232 ‘Meningomyel-ome’ comprised 439 genes, including 257 propagated genes, and  
233 exhibited 2,447 interconnected edges. We found an over-representation of 374  
234 experimentally proven mouse NTD causal genes<sup>30</sup> (**Supplementary Data**) in both seed  
235 and propagated genes (11 and 17 of the mouse NTD genes in before- and after  
236 propagation, one-tailed hypergeometric  $P$  value: 0.0015), corroborating functional  
237 relatedness to human MM. In contrast, no such relatedness was found with propagation in  
238 genes carrying DNMs in control trios ( $P$  value: 0.295).

239 Applying a clustering algorithm<sup>31</sup> to the ‘Meningomyel-ome’, we identified five  
240 subnetworks in which damaging DNMs and propagated genes were closely connected  
241 and enriched within predefined signaling pathways (referred to as submodules):  
242 RHO/RAC1 GTPase based actin cytoskeleton organization, microtubule-based process,  
243 neuronal migration and axon guidance, metabolism of lipids, and histone modification  
244 (FDR  $< 10^{-5}$ , **Fig. 3a**, see **Methods**)<sup>6,32-38</sup>, suggesting that disrupting these pathways can  
245 increase MM risk. Notably, a higher haploinsufficiency of the 51 propagated genes  
246 within the submodules (pLI = 0.98 vs. 0.69 of 46 seed genes in median, see **Extended**  
247 **Data Fig. 8**) substantiated the utility of network propagation to further implicate  
248 potentially lethal MM risk genes.

249 Common among the twelve most strongly associated signaling pathways with  
250 FDR below  $10^{-8}$  was actin and microtubules organization processes (**Fig. 3b**). Functional  
251 relatedness to other submodules of higher-level processes<sup>39,40</sup> and essential roles in the  
252 neural fold adhesion and closure<sup>41,42</sup> suggest that RHO/RAC1 GTPase-mediated actin and  
253 microtubule organization processes contribute to human MM risk.

254

### 255 **Functional validation of candidate MM genes**

256 We next performed functional assessment of candidate MM DNM alleles or genes. Seven  
257 genes—*TNK2*, *TIAM1*, *PLCE1*, *BRSK2*, *CLIP2*, *VWA8*, and *WHAMM*—were selected by  
258 their relevance to the RHOA/RAC1/CDC42-mediated actin and microtubule  
259 polymerization, five of which are direct regulators (**Fig. 4a, Methods**). Patient mutations  
260 in these genes were all D-Mis DNMs usually in regulatory domains predicted to interfere  
261 with protein function, except for LGD mutation in *WHAMM* predicted to truncate the  
262 protein. *TNK2* is a CDC42-activated kinase that phosphorylates WASP among other  
263 targets. We found that immunoprecipitated *TNK2* p.P186L DNM had approximately  
264 60% reduced kinase activity to a WASP pseudo substrate, as benchmarked against  
265 wildtype and kinase-dead versions (**Fig. 4b and Extended Data Fig. 9**). *TIAM1* is a Src-  
266 activated RAC1-specific guanine nucleotide exchange factor that promotes filamentous

267 actin (F-actin) assembly. We found that wild type TIAM1 but not the TIAM1 p.H1149P  
268 DNM co-localized with filamentous actin (**Fig. 4c-d**). While basal Rac1 activation was  
269 unperturbed, p.H1149P showed significant reduction in Rac1 activation following co-  
270 expression with constitutively activate Src (**Fig. 4e** and **Extended Data Fig. 10**). VWA8  
271 is a recurrently mutated mitochondrial matrix-targeting ATPase. We found that the  
272 p.R230G proband mutation failed to produce VWA8 protein evidenced on Western blot  
273 when transfected in HEK293T cells (**Extended Data Fig. 11**). Assessment of CLIP2,  
274 BRSK2 and PLCE1 MM proband mutations did not report robust defective protein  
275 function in standard assays (**Extended Data Fig. 12-14**). Interestingly the DNM  
276 mutations showing impaired protein function have previously been directly or indirectly  
277 linked to NTDs in animal models (see **Supplementary Information**). Thus, half of the  
278 six missense mutations showed clear disrupted function, consistent with our predicted  
279 rate of DNMs contributing to MM risk (52.43% of LGD, and 28.26% of damaging  
280 DNMs).

281 An LGD mutation found in *WHAMM* was selected for *in vivo* functional  
282 assessment in a *Xenopus laevis* neural tube closure model. Splice-blocking morpholino  
283 (MO) of the orthologous *Whamm* protein (**Methods**) resulted in dose-dependent NTDs  
284 (**Fig. 4f-h**). Specifically, injection of 5 ng of MO led to mild NTD, while 10 ng injection  
285 resulted in more severe open NTD in both anterior and posterior regions, as evidenced by  
286 *pax3* in situ hybridization, and was rescued by expression of wildtype *Whamm*  
287 (**Extended Data Fig. 15**). These findings confirm the role of at least one of the DNM  
288 genes in MM pathogenesis *in vivo* and underscore potential gene dosage effects  
289 contributing to MM risk.

### 291 **Expanding clinical phenotypes to include MM**

292 We noted that 82 of the MM DNM genes were previously implicated in syndromic or  
293 nonsyndromic phenotypes in the Online Mendelian Inheritance in Man (OMIM) database  
294 <sup>43</sup>, raising the question of whether our MM subjects might also express some of these  
295 OMIM phenotypes. By recontacting families, we found that 6% (5 out of 83) of the MM  
296 subjects (i.e. with mutations in *ZSWIM6*, *PAX3* in two subjects, *TCF12* and *BICRA*) had  
297 clinical features in addition to MM (Acromelic frontonasal dysostosis, Waardenburg,  
298 Craniosynostosis and Coffin-Siris syndromes, respectively), that suggest MM as a  
299 phenotyping expansion (**Supplementary Table 1**). Some subjects were lost to follow up,  
300 leading to 21.6% of the phenotypes that could be excluded due to lack of full clinical  
301 information. An additional 2 subjects (2.4%) shared some clinical features with OMIM  
302 phenotypes but insufficient to make the clinical diagnoses. For the majority of these 82  
303 subjects, the zygosity did not match the OMIM zygosity (i.e. dominant vs. recessive), so  
304 it was not surprising that 70% of subjects lacked any OMIM clinical features. We  
305 conclude that MM can infrequently present as partially penetrant phenotype in  
306 established OMIM disorders, and suggest that specific alleles or environmental factors  
307 may determine expressivity.

### 309 **Discussion**

310 In this study, we present the first large-scale assessment of DNMs contributing to MM  
311 risk. Approximately 22% of MM probands had damaging DNMs, of which about 28%  
312 were expected to contribute to MM risk. This risk is comparable to other severe pediatric

313 conditions that are likely under strong purifying selection, as the mutations are unlikely to  
314 propagate to offspring<sup>44-46</sup>. In addition to the LGD DNMs found in other severe pediatric  
315 conditions, we found strong enrichment of D-Mis DNMs, suggesting that some LGD  
316 mutations in these genes may be lethal during embryogenesis. It would be interesting to  
317 assess the contribution of D-Mis mutations in other severe pediatric conditions.

318 Although only a subset of the genes identified likely contribute risk, we found that  
319 candidate MM genes were more interconnected than expected by chance. This lends  
320 support to the existence of a ‘Meningomyel-ome’, characterized by numerous genes that  
321 have potential to affect phenotype, interconnected by regulatory or protein-interaction  
322 networks, aligning with an omnigenic model<sup>47</sup>. Many of the networks highlight pathways  
323 previously implicated from mouse or frog models, including Wnt signaling, planar cell  
324 polarity, actin regulation and cell signaling. Notably, there was little overlap of mutated  
325 genes in humans with animal NTD models. One difference is that mouse and frog NTD  
326 genes are often identified as lethal embryonic phenotypes<sup>48,49</sup>, whereas our ascertainment  
327 was limited to living subjects. Thus, while the genes implicated in laboratory animals vs.  
328 human NTDs may be different, we expect the pathways to be highly similar, evident in  
329 the Meningomyel-ome. Future work could introduce human DNMs into vertebrate  
330 models or human neural tube stem cell models, to bridge this divide.

331 Of the 187 genes with DNMs in MM subjects, 83 were previously implicated in  
332 human phenotypes according to OMIM. Only two of these OMIM conditions listed MM  
333 as part of the associated spectrum, and in only five subjects was the overlap sufficient for  
334 clinical diagnosis of the linked OMIM phenotype. This suggests that MM should be  
335 considered as part of the clinical continuum of a variety of OMIM conditions, which may  
336 be expressed in an allelic- or zygosity-specific fashion. Surprisingly, only five of the 187  
337 genes were recurrently mutated in our cohort, suggesting there could be thousands of  
338 genes contributing to MM risk (**Supplementary Information**).

339 Our findings do not resolve the pathogenesis of most MM cases. Rare and de  
340 novo copy-number variants<sup>50</sup>, or inherited variants could also contribute to risk<sup>51</sup>. It is  
341 also possible that regulatory mutations contribute, perhaps modulated by folic acid.  
342 Lastly, evidence of gene dosage sensitivity raises the possibility that environmental  
343 factors during critical developmental windows might amplify the effects of mutations.



344 **Figures**

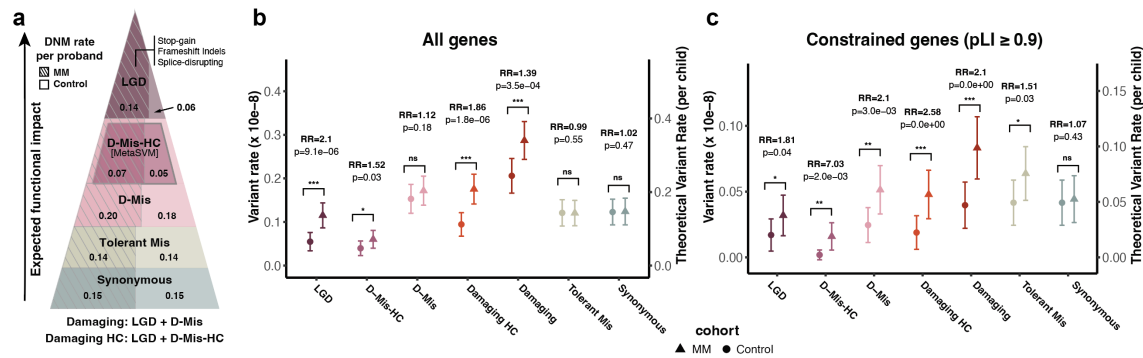

345 **Figure 1. Enrichment of damaging DNMs in MM versus control.** **a**, DNMs  
 346 categorized by predicted functional impact: LGD (likely gene disrupting), D-Mis  
 347 (damaging missense), D-Mis-HC (damaging missense of high confidence, called from a  
 348 meta predictor), Tolerant Mis (missense of tolerant functional impact), and Synonymous.  
 349 DNM rates per proband in MM (left sides of the triangle with strips) and control (right  
 350 sides). Areas represent the ratio of the DNM rates between MM and controls within each  
 351 functional category. Hashed: MM; Unhashed: controls. **b–c**, Variant rate ( $10^{-8}$ ) and  
 352 theoretical rate (DNM rate per child) on left and right y-axis, respectively. Statistical  
 353 analysis of the ratio of DNM rates between MM (triangles) and controls (circles), denoted  
 354 by ratio of the two Poisson rates, or rate ratio (RR), calculated within **(b)** ‘All genes’ ( $n =$   
 355 19,658) and **(c)** ‘Constrained genes’ ( $n = 3,060$ ;  $pLI \geq 0.9$ ). Theoretical rate was  
 356 calculated by normalization of the variant rate with the total size of hg38 coding region  
 357 (59,281,518 bp). Observed and theoretical DNM rates are marked in the left and right y-  
 358 axis, respectively.  $P$  values were calculated by a one-sided rate-ratio test.  $P$  values:  
 359 \*\*\*  $< 0.001$ , \*\*  $< 0.01$ , \*  $< 0.05$ . ns: not significant.  
 360  
 361

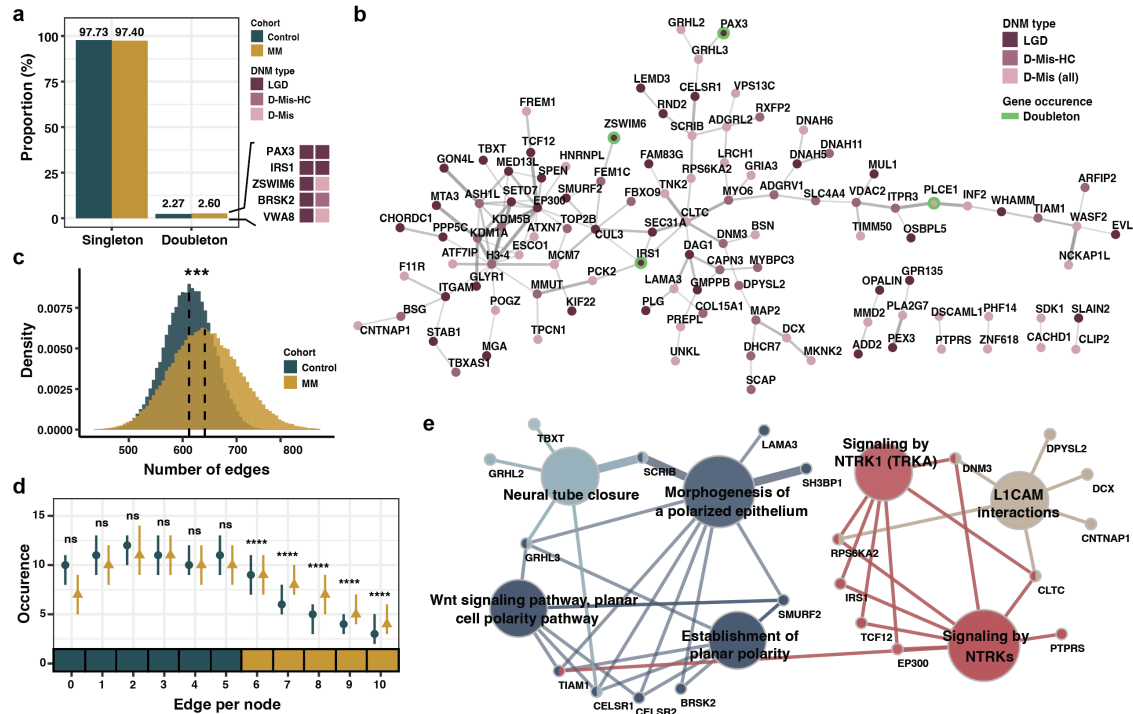

362  
363

364 **Figure 2. Functional convergence of genes implicated by damaging DNMs.** **a**,  
365 Proportion of singletons (DNM occurred in one trio) and doubletons (DNMs occurred in  
366 two independent trios) damaging (LGD or D-Mis) genes in controls (green) and MM  
367 (yellow). Six doubleton genes were annotated with variant functional categories (LGD, D-  
368 Mis-HC, or D-Mis). **b**, A protein-protein interaction network composed of MM DNM  
369 genes. Genes connected by at least one edge are shown; unconnected (orphan) genes are  
370 shown in **Extended Data Fig. 3a**. Node color: variant functional categories: LGD (purple),  
371 D-Mis (light pink), and D-Mis-HC (dark pink). Doubleton genes: green borders. Edge  
372 thickness: confidence score of the protein interaction, defined in the STRING database. **c**,  
373 Distribution of the total number of edges in 100,000 networks randomly generated with  
374 bootstrapping (selecting gene set size of 108 (i.e. 80% of the 135 control DNM genes) in  
375 control (green) and MM (yellow). Higher number of edges denotes denser network  
376 interconnection. *P* values calculated by two-sided Wilcoxon rank-sum test. **d**, Number of  
377 nodes with *n* (0 to 10) edges in controls (green) and MM (yellow) gene sets. Error bars:  
378 first and third quartile. *P* values calculated by a one-sided Wilcoxon rank-sum test. **e**, GO  
379 (Gene Ontology) term network visualization for genes overlapping with 187 MM DNM  
380 genes with statistical significance (a.k.a., GO enrichment analysis). GO terms of functional  
381 relevance connected by an edge via commonly involved genes (small circles). Node sizes:  
382 significance of the terms. Degree of connectivity between terms (edges): kappa statistics  
383 by ClueGO. \*\*\*\**P* value < 0.0001. ns: not significant.

384  
385  
386

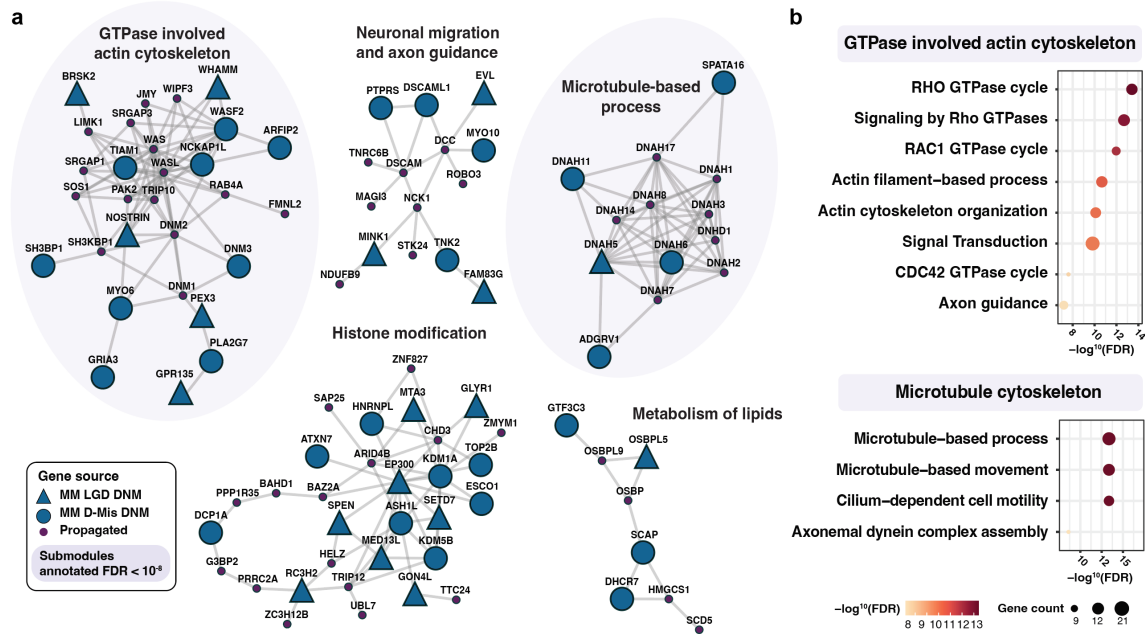

387  
388  
389  
390  
391  
392  
393  
394  
395  
396  
397  
398

**Figure 3. Functional modules that contribute to MM risk.** **a**, Functional submodules clustered from the propagated network, ‘Meningomyel-ome’, with the 187 damaging DNM genes from MM cohort used as seeds. Clustered with a Leiden algorithm with co-expression value from STRING database as attributes, five submodules annotated FDR < 10<sup>-6</sup> by Gene Ontology (GO) Biological Process, KEGG, or Reactome databases shown. **b**, Topmost significantly enriched GO Biological Processes with FDR < 10<sup>-8</sup> shown. FDR value: -log<sup>10</sup> scale. LGD DNMs genes: blue triangle. D-Mis DNMs: blue circles. Propagated genes: small purple circles. Functional terms annotated with FDR < 10<sup>-8</sup> colored with light purple background.

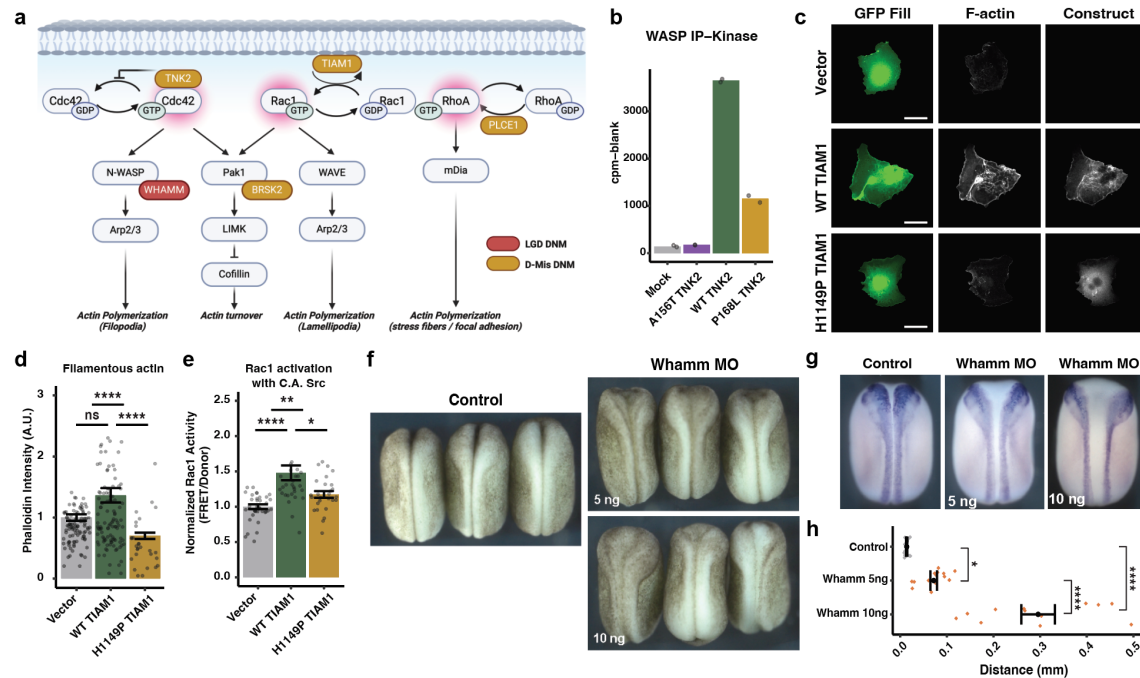

399

400

**Figure 4. Functional validation of damaging DNMs related to actin polymerization.**

401

**a**, Damaging DNM genes highlight ‘GTPase involved actin cytoskeleton pathway’

402

mediated by WASP and WAVE, involving three GTPases (CDC42, RAC1, and RHOA)

403

and five mutated genes *TNK2*, *TIAM1*, *WHAMM*, *PLCE1*, and *BRSK2*. Red circle: LGD

404

DNM, Dark yellow circle: D-Mis DNM. **b**, *TNK2* p.P168L patient mutation impaired

405

WASP phosphorylation from immunoprecipitation (IP) kinase assay, compared to WT

406

and kinase dead p.A156T. **c–d**, *TIAM1* p.H1149P patient mutation showed fewer

407

lamellipodia (F-actin) compared to WT, **(c)** imaged with Phalloidin and **(d)** quantified.

408

Kruskal-Wallis followed by a pairwise Wilcoxon test, *P* value adjusted with Bonferroni.

409

Data shown with Hampel filter and images masked to remove other cells. **e**, *TIAM1*

410

p.H1149P patient mutation decreased Rac1 activation with constitutively active (C.A.)

411

Src, observed with Förster resonance energy transfer (FRET). Kruskal-Wallis followed

412

by a pairwise Wilcoxon test, *P* value adjusted with Bonferroni. Data shown with Hampel

413

filter. **f**, Dorsal views of *Xenopus laevis* embryos injected with Whamm morpholino

414

(MO) at Stage 19. Neural tube closure phenotypes observed in a dose-dependent manner

415

with 5 and 10 ng MO. **g**, Neural folds visualized by *pax3* in situ hybridization in the late

416

neural stage. **h**, Quantification of distance between neural folds. Newman-Keuls (two-

417

sided) for control versus multiple conditions after ANOVA. *P* values: \*\*\*\* < 0.0001,

418

\*\*\* < 0.001, \*\* < 0.01, \* < 0.05. ns: not significant, LGD: likely-gene disrupting, D-Mis:

419

damaging missense; WT: wild-type.

## 420 References

- 421
- 422 1 Iskandar, B. J. & Finnell, R. H. Spina bifida. *N Engl J Med* **387**, 444-450 (2022).  
423 <https://doi.org/10.1056/NEJMra2116032>
- 424 2 Lee, S. & Gleeson, J. G. Closing in on mechanisms of open neural tube defects.  
425 *Trends Neurosci* **43**, 519-532 (2020). <https://doi.org/10.1016/j.tins.2020.04.009>
- 426 3 Prevention of neural tube defects: results of the Medical Research Council  
427 vitamin study. MRC Vitamin Study Research Group. *Lancet* **338**, 131-137 (1991).
- 428 4 J, A. *Myelocyste, transposition von gewebskeimen und sympodie*. Vol. Beitr Path  
429 Anat 16:1–28, 1894 (1894).
- 430 5 Chiari, H. Uber veränderungen des kleinhirns infolge von hydrocephalie des  
431 grosshirns. *Dtsch Med Wochenschr* **17**, 1172–1175 (1891).
- 432 6 Wilde, J. J., Petersen, J. R. & Niswander, L. Genetic, epigenetic, and  
433 environmental contributions to neural tube closure. *Annu Rev Genet* **48**, 583-611  
434 (2014). <https://doi.org/10.1146/annurev-genet-120213-092208>
- 435 7 Carter, C. O. & Evans, K. Spina bifida and anencephalus in greater London. *J*  
436 *Med Genet* **10**, 209-234 (1973). <https://doi.org/10.1136/jmg.10.3.209>
- 437 8 Zhang, T. *et al.* Genetic variants in the folate pathway and the risk of neural tube  
438 defects: a meta-analysis of the published literature. *PLoS One* **8**, e59570 (2013).  
439 <https://doi.org/10.1371/journal.pone.0059570>
- 440 9 Lei, Y. *et al.* Identification of novel CELSR1 mutations in spina bifida. *PLoS One*  
441 **9**, e92207 (2014). <https://doi.org/10.1371/journal.pone.0092207>
- 442 10 Kibar, Z. *et al.* Mutations in VANGL1 associated with neural-tube defects. *N*  
443 *Engl J Med* **356**, 1432-1437 (2007). <https://doi.org/10.1056/NEJMoa060651>
- 444 11 Morrison, K. *et al.* Genetic mapping of the human homologue (T) of mouse  
445 T(Brachyury) and a search for allele association between human T and spina  
446 bifida. *Hum Mol Genet* **5**, 669-674 (1996). <https://doi.org/10.1093/hmg/5.5.669>
- 447 12 Jensen, L. E., Etheredge, A. J., Brown, K. S., Mitchell, L. E. & Whitehead, A. S.  
448 Maternal genotype for the monocyte chemoattractant protein 1 A(-2518)G  
449 promoter polymorphism is associated with the risk of spina bifida in offspring.  
450 *Am J Med Genet A* **140**, 1114-1118 (2006). <https://doi.org/10.1002/ajmg.a.31212>
- 451 13 Iossifov, I. *et al.* The contribution of de novo coding mutations to autism  
452 spectrum disorder. *Nature* **515**, 216-221 (2014).  
453 <https://doi.org/10.1038/nature13908>
- 454 14 Zaidi, S. *et al.* De novo mutations in histone-modifying genes in congenital heart  
455 disease. *Nature* **498**, 220-223 (2013). <https://doi.org/10.1038/nature12141>
- 456 15 Lemay, P. *et al.* Loss-of-function de novo mutations play an important role in  
457 severe human neural tube defects. *J Med Genet* **52**, 493-497 (2015).  
458 <https://doi.org/10.1136/jmedgenet-2015-103027>
- 459 16 Fischbach, G. D. & Lord, C. The Simons Simplex Collection: a resource for  
460 identification of autism genetic risk factors. *Neuron* **68**, 192-195 (2010).  
461 <https://doi.org/10.1016/j.neuron.2010.10.006>
- 462 17 Rahbari, R. *et al.* Timing, rates and spectra of human germline mutation. *Nat*  
463 *Genet* **48**, 126-133 (2016). <https://doi.org/10.1038/ng.3469>

- 464 18 Kessler, M. D. *et al.* De novo mutations across 1,465 diverse genomes reveal  
465 mutational insights and reductions in the Amish founder population. *Proc Natl*  
466 *Acad Sci U S A* **117**, 2560-2569 (2020). <https://doi.org/10.1073/pnas.1902766117>  
467 19 Besenbacher, S. *et al.* Novel variation and de novo mutation rates in population-  
468 wide de novo assembled Danish trios. *Nat Commun* **6**, 5969 (2015).  
469 <https://doi.org/10.1038/ncomms6969>  
470 20 Frome, E. L. The analysis of rates using Poisson regression models. *Biometrics*  
471 **39**, 665-674 (1983).  
472 21 Willsey, A. J. *et al.* De novo coding variants are strongly associated with Tourette  
473 Disorder. *Neuron* **94**, 486-499 e489 (2017).  
474 <https://doi.org/10.1016/j.neuron.2017.04.024>  
475 22 Kong, A. *et al.* Rate of de novo mutations and the importance of father's age to  
476 disease risk. *Nature* **488**, 471-475 (2012). <https://doi.org/10.1038/nature11396>  
477 23 Goldmann, J. M., Veltman, J. A. & Gilissen, C. De novo mutations reflect  
478 development and aging of the human germline. *Trends Genet* **35**, 828-839 (2019).  
479 <https://doi.org/10.1016/j.tig.2019.08.005>  
480 24 Turner, T. N. *et al.* Genomic patterns of de novo mutation in simplex Autism.  
481 *Cell* **171**, 710-722 e712 (2017). <https://doi.org/10.1016/j.cell.2017.08.047>  
482 25 Martin, J. *et al.* A brief report: de novo copy number variants in children with  
483 attention deficit hyperactivity disorder. *Transl Psychiatry* **10**, 135 (2020).  
484 <https://doi.org/10.1038/s41398-020-0821-y>  
485 26 Sanders, S. J. *et al.* Multiple recurrent de novo CNVs, including duplications of  
486 the 7q11.23 Williams syndrome region, are strongly associated with autism.  
487 *Neuron* **70**, 863-885 (2011). <https://doi.org/10.1016/j.neuron.2011.05.002>  
488 27 Hol, F. A. *et al.* A frameshift mutation in the gene for PAX3 in a girl with spina  
489 bifida and mild signs of Waardenburg syndrome. *J Med Genet* **32**, 52-56 (1995).  
490 <https://doi.org/10.1136/jmg.32.1.52>  
491 28 Szklarczyk, D. *et al.* The STRING database in 2023: protein-protein association  
492 networks and functional enrichment analyses for any sequenced genome of  
493 interest. *Nucleic Acids Res* **51**, D638-D646 (2023).  
494 <https://doi.org/10.1093/nar/gkac1000>  
495 29 Cowen, L., Ideker, T., Raphael, B. J. & Sharan, R. Network propagation: a  
496 universal amplifier of genetic associations. *Nat Rev Genet* **18**, 551-562 (2017).  
497 <https://doi.org/10.1038/nrg.2017.38>  
498 30 Harris, M. J. & Juriloff, D. M. An update to the list of mouse mutants with neural  
499 tube closure defects and advances toward a complete genetic perspective of neural  
500 tube closure. *Birth Defects Res A Clin Mol Teratol* **88**, 653-669 (2010).  
501 <https://doi.org/10.1002/bdra.20676>  
502 31 Traag, V. A., Waltman, L. & van Eck, N. J. From Louvain to Leiden:  
503 guaranteeing well-connected communities. *Sci Rep* **9**, 5233 (2019).  
504 <https://doi.org/10.1038/s41598-019-41695-z>  
505 32 Rolo, A., Escuin, S., Greene, N. D. E. & Copp, A. J. Rho GTPases in mammalian  
506 spinal neural tube closure. *Small GTPases* **9**, 283-289 (2018).  
507 <https://doi.org/10.1080/21541248.2016.1235388>

- 508 33 Wallingford, J. B., Niswander, L. A., Shaw, G. M. & Finnell, R. H. The  
509 continuing challenge of understanding, preventing, and treating neural tube  
510 defects. *Science* **339**, 1222002 (2013). <https://doi.org/10.1126/science.1222002>  
511 34 Niederkofler, V., Salie, R., Sigrist, M. & Arber, S. Repulsive guidance molecule  
512 (RGM) gene function is required for neural tube closure but not retinal  
513 topography in the mouse visual system. *J Neurosci* **24**, 808-818 (2004).  
514 <https://doi.org/10.1523/JNEUROSCI.4610-03.2004>  
515 35 Kee, N., Wilson, N., Key, B. & Cooper, H. M. Netrin-1 is required for efficient  
516 neural tube closure. *Dev Neurobiol* **73**, 176-187 (2013).  
517 <https://doi.org/10.1002/dneu.22051>  
518 36 Greene, N. D., Stanier, P. & Moore, G. E. The emerging role of epigenetic  
519 mechanisms in the etiology of neural tube defects. *Epigenetics* **6**, 875-883 (2011).  
520 <https://doi.org/10.4161/epi.6.7.16400>  
521 37 Akimova, D. *et al.* Metabolite profiling of whole murine embryos reveals  
522 metabolic perturbations associated with maternal valproate-induced neural tube  
523 closure defects. *Birth Defects Res* **109**, 106-119 (2017).  
524 <https://doi.org/10.1002/bdra.23583>  
525 38 Copp, A. J., Stanier, P. & Greene, N. D. Neural tube defects: recent advances,  
526 unsolved questions, and controversies. *Lancet Neurol* **12**, 799-810 (2013).  
527 [https://doi.org/10.1016/S1474-4422\(13\)70110-8](https://doi.org/10.1016/S1474-4422(13)70110-8)  
528 39 Schaar, B. T. & McConnell, S. K. Cytoskeletal coordination during neuronal  
529 migration. *Proc Natl Acad Sci U S A* **102**, 13652-13657 (2005).  
530 <https://doi.org/10.1073/pnas.0506008102>  
531 40 Dent, E. W., Gupton, S. L. & Gertler, F. B. The growth cone cytoskeleton in axon  
532 outgrowth and guidance. *Cold Spring Harb Perspect Biol* **3** (2011).  
533 <https://doi.org/10.1101/cshperspect.a001800>  
534 41 Geelen, J. A. & Langman, J. Closure of the neural tube in the cephalic region of  
535 the mouse embryo. *Anat Rec* **189**, 625-640 (1977).  
536 <https://doi.org/10.1002/ar.1091890407>  
537 42 Rolo, A. *et al.* Regulation of cell protrusions by small GTPases during fusion of  
538 the neural folds. *Elife* **5**, e13273 (2016). <https://doi.org/10.7554/eLife.13273>  
539 43 Hamosh, A., Scott, A. F., Amberger, J. S., Bocchini, C. A. & McKusick, V. A.  
540 Online Mendelian Inheritance in Man (OMIM), a knowledgebase of human genes  
541 and genetic disorders. *Nucleic Acids Res* **33**, D514-517 (2005).  
542 <https://doi.org/10.1093/nar/gki033>  
543 44 Jin, S. C. *et al.* Contribution of rare inherited and de novo variants in 2,871  
544 congenital heart disease probands. *Nat Genet* **49**, 1593-1601 (2017).  
545 <https://doi.org/10.1038/ng.3970>  
546 45 Halvorsen, M. *et al.* De novo mutations in childhood cases of sudden unexplained  
547 death that disrupt intracellular Ca(2+) regulation. *Proc Natl Acad Sci U S A* **118**  
548 (2021). <https://doi.org/10.1073/pnas.2115140118>  
549 46 Li, W. *et al.* De novo mutations contributes approximately 7% of pathogenicity in  
550 inherited eye diseases. *Invest Ophthalmol Vis Sci* **64**, 5 (2023).  
551 <https://doi.org/10.1167/iovs.64.2.5>

- 552 47 Boyle, E. A., Li, Y. I. & Pritchard, J. K. An expanded view of complex traits:  
553 from polygenic to omnigenic. *Cell* **169**, 1177-1186 (2017).  
554 <https://doi.org/10.1016/j.cell.2017.05.038>
- 555 48 Lemos, M. C. *et al.* Genetic background influences embryonic lethality and the  
556 occurrence of neural tube defects in Men1 null mice: relevance to genetic  
557 modifiers. *J Endocrinol* **203**, 133-142 (2009). [https://doi.org/10.1677/JOE-09-](https://doi.org/10.1677/JOE-09-0124)  
558 [0124](https://doi.org/10.1677/JOE-09-0124)
- 559 49 Momb, J. *et al.* Deletion of Mthfd11 causes embryonic lethality and neural tube  
560 and craniofacial defects in mice. *Proc Natl Acad Sci U S A* **110**, 549-554 (2013).  
561 <https://doi.org/10.1073/pnas.1211199110>
- 562 50 Bassuk, A. G. *et al.* Copy number variation analysis implicates the cell polarity  
563 gene glypican 5 as a human spina bifida candidate gene. *Hum Mol Genet* **22**,  
564 1097-1111 (2013). <https://doi.org/10.1093/hmg/dd515>
- 565 51 Wolujewicz, P. *et al.* Genome-wide investigation identifies a rare copy-number  
566 variant burden associated with human spina bifida. *Genet Med* **23**, 1211-1218  
567 (2021). <https://doi.org/10.1038/s41436-021-01126-9>  
568



569 **Tables**

| Variant type                        | Theoretical rate per child<br>(±95% CI) |                  | % of cases with DNM<br>mediating risk (±95% CI) | % of DNM carrying MM<br>risk (±95% CI) |
|-------------------------------------|-----------------------------------------|------------------|-------------------------------------------------|----------------------------------------|
|                                     | MM (n=772)                              | Control (n=724)  |                                                 |                                        |
| <b>Likely Gene Disrupting (LGD)</b> | 0.12 (0.09-0.14)                        | 0.05 (0.03-0.08) | 7.16% (2.96%-11.36%)                            | 52.43% (21.67%-83.18%)                 |
| <b>Damaging HC</b>                  | 0.18 (0.14-0.21)                        | 0.09 (0.07-0.12) | 9.60% (4.45%-14.75%)                            | 46.15% (21.38-70.92)                   |
| <b>Damaging</b>                     | 0.29 (0.24-0.33)                        | 0.21 (0.17-0.25) | 9.62% (2.64%-16.59%)                            | 28.26% (7.75-48.76)                    |

570

571 **Table 1. Contribution of DNMs to MM risk**

572 The DNM theoretical rate (i.e., DNM rate per child) of MM ( $n = 772$ ) and control ( $n =$   
573  $724$ ) trios are shown with the 95% confidence interval (CI) of the rate using a one-sample  
574 t-test. The % of cases with DNM mediating risk were calculated by the difference  
575 between the theoretical rate of the MM and the control with 95% CI using a two-sample  
576 t-test (two-sided). The % of cases with DNM mediating risk was estimated by dividing  
577 the difference of theoretical rate between MM and control, by the theoretical rate of MM  
578 trios, with the 95% CI using two-sample t-test. The theoretical rates were calculated  
579 based on consensus regions for proper comparison of DNM rates. Damaging DNM  
580 includes LGD (Likely Gene Disrupting) and D-Mis DNM. Damaging-HC (high  
581 confidence) includes LGD and D-Mis-HC (high confidence).

## 582 **Methods**

583

### 584 **Establishment of Spina Bifida Sequencing Consortium (SBSC) cohort**

#### 585 *Inclusion criteria*

586 Strict inclusion criteria were set for subject enrollment into the Spina Bifida Sequencing  
587 Consortium (SBSC). Participants must be affected by lumbosacral meningomyelocele  
588 (MM) with Arnold-Chiari malformation and hydrocephalus requiring surgical  
589 intervention such as ventriculoperitoneal shunt or endoscopic third ventriculostomy. We  
590 excluded subjects with closed neural tube defects, not requiring surgery at birth, with  
591 meningocele, or without hydrocephalus or not requiring surgery at birth. Enrollment  
592 required that both biological parents were available for sampling. In the case of fetal  
593 surgery to correct MM, which reduces the incidence of hydrocephalus, the requirement  
594 for inclusion of hydrocephalus at the time of enrollment was lifted. Subjects with known  
595 syndromes that would explain their conditions were excluded. Any families that did not  
596 meet the strict inclusion criteria were excluded.

597

#### 598 *Recruitment*

599 The SBSC used several concurrent recruitment approaches: 1] Identify recruitable MM  
600 trios from local, national, and international hospitals. 2] Social media outreach through  
601 the Spina Bifida Association (SBA) Twitter, Facebook and Instagram accounts directly to  
602 families. 3] Recruit from spina bifida multidisciplinary clinics around the world with high  
603 MM caseloads. 4] Leverage historic Center for Disease Control-supported neural tube  
604 defect (NTD) cohorts. 5] Share sequencing data that have been already generated from  
605 trios with members of the SBSC and publicly with the NIH supported dbGaP. 6] Subjects  
606 and/or their families also contacted the SBSC independently through our postings and  
607 advertisements on social media. The countries where the participants were recruited  
608 include the United States, Mexico, Brazil, Italy, Georgia, Egypt, Canada, Venezuela,  
609 Pakistan, Guatemala, and Nigeria. All subjects or their guardians provided written  
610 informed consent approved by the UCSD Institutional Review Board S99075 protocol  
611 140028, expiration date Aug 1, 2024. Recruitment processes were conducted in  
612 accordance with the approval by review boards of the University of California San Diego,  
613 operating under Federal-wide Assurance number, FWA00004495. The above rulings  
614 cover all aspects of our study, not just recruitment and consent.

615

#### 616 *Identifiers*

617 The subject IDs used in this study cannot reveal the identity of the study subjects. These  
618 IDs are not know to anyone outside the research group.

619

#### 620 *Study questionnaire*

621 All families prospectively recruited completed a standardized SBSC Questionnaire,  
622 which confirmed inclusion criteria, documented past medical history and current status  
623 by adopting prior questionnaire fields<sup>52</sup>, along with place and date of birth of affected and  
624 parents to control DNM rate for parental age at the time of conception.

625

#### 626 *Subject sample and data handling*

627 DNA was extracted from blood or saliva by standard salt extraction protocols using  
628 Qiagen (Germantown, MD) or Autogen (Holliston, MA) proto\ prior CDC-funded  
629 recruitment efforts where recontact was not possible, and thus they were considered ‘lost  
630 to follow-up’ for sample re-collection. There were 37 families that had prior trio WES<sup>15</sup>  
631 where data was incorporated into the cohort using the standardized bioinformatics  
632 pipeline.

633

### 634 **Sequence data generation**

635 In total, 2541 samples from 851 MM trios (839 trios and 6 quartets) were eligible for  
636 whole exome sequencing with six target capture kits (Roche Exome V2, Agilent xGen  
637 Exome V1, Agilent SureSelect v4, Agilent SureSelect V4, IDT xGen Exome V2, and  
638 Twist human comprehensive exome), each trio sequenced by using the same capture kit.  
639 Samples with low concentration of DNA, gender discordant, or contamination yielded 45  
640 samples to be failed quality control, resulting in 794 trios and 6 quartets. For control trios,  
641 we obtained 732 healthy trios from the SAFARI cohort<sup>16</sup>, 2202 WES data captured with  
642 NimbleGen EZ v2.

643

### 644 **Data preprocessing and quality control**

645 Raw reads were aligned to reference genome (GRCh38) using bwa mem (0.7.17),  
646 preprocessed with PICARD (2.20.7) AddOrReplaceReadGroups and MarkDuplicates.  
647 Germline variants were collected with GATK (v4.11.0) HaplotypeCaller in the reference  
648 confidence model (-ERC GVCF) to be combined via CombineGVCF, generating a joint  
649 vcf for all MM and control trios, followed by GenotypeGVCF (v4.11.0) to be jointly  
650 genotyped. Multiallelic variants were splited (bcftools norm -m -any), Indels were  
651 realigned, and base quality recalibration was done with GATK (v.4.0.11) with known  
652 Indel and population frequency information (dbSNP (146) and  
653 Mills\_and\_1000G\_gold\_standard.indels.hg38.vcf.gz from GATK resource bundle).  
654 Variant quality was recalibrated by GATK VQSR with HapMap  
655 (hapmap\_3.3.hg38.vcf.gz), omni (1000G\_omni2.5.hg38.vcf.gz), 1000G  
656 (1000G\_phase1.snps.high\_confidence.hg38.vcf.gz),  
657 (Mills\_and\_1000G\_gold\_standard.indels.hg38.vcf.gz), and axiom  
658 (Axiom\_Exome\_Plus.genotypes.all\_populations.poly.hg38.vcf.gz).  
659 To confirm the kinship integrity within trios, we used TRUFFLE<sup>53</sup> (v1.38), removing 29  
660 and 7 trios from MM and control cohort, respectively. IBD1 values were extracted from  
661 the vcf, by only using variants with allele frequencies higher than 0.05 (--maf 0.05) to  
662 only use confident calls. The IBD1 for all possible sample pairs were examined and if a  
663 parent-child IBD1 value is smaller than 0.75. Also, samples having more relations (IBD1  
664  $\geq 0.75$ ) with one outside of their family were removed, possibly owing to low data  
665 quality or contamination.

666

### 667 **De novo variant calling**

668 De novo SNVs and Indels were collected following GATK genotype refinement steps.  
669 The genotypes of 777 MM and 725 control trios were gathered, and posterior  
670 probabilities of the variants were calculated with CalculateGenotypePosteriors (v4.2.6.1).  
671 We only selected de novo variants having genotype qualities (GQ)  $\geq 20$ , Mapping quality  
672 (MQ)  $\geq 30$ , and PASS in VQSR. Candidate DNMs that were found to have sequencing

673 depth (DP)  $\geq 12$  in all three family members were kept to secure high-confident calls. To  
674 remove candidates that deviate from theoretical heterozygous states (AF=0.5), a two-  
675 sided binomial test was conducted to all positions by applying read depths and number of  
676 alternative alleles, removing sites with  $P$  value  $> 0.01$ . Genotypes of both parents were  
677 examined and kept if genotyped as reference homozygous (GT=0/0). To enhance the  
678 robustness of a high-confident set of DNMs, a series of post-filters were applied, by  
679 examining regional information and raw allele counts. First, clustered DNMs were  
680 filtered out when two or more DNMs of one proband were observed within 10 bp.  
681 Second, DNMs that were found to exist in the same genotypes in parents either in MM or  
682 control cohorts were also removed. For de novo SNVs, each DNM position was  
683 examined by collecting raw reads with base quality ( $> 13$ ) and mapping quality ( $> 0$ )  
684 criteria for each trio (bcftools mpileup v1.9). Then, to remove artifacts derived from  
685 miscellaneous alignment, a position was filtered out when a same alternative allele was  
686 observed in either of the parents. Two-sided binomial test was once more applied for  
687 SNVs with raw read counts, with a strict cutoff 0.05. All Indels were manually inspected  
688 with IGV (Integrative Genomics Viewer) by three experienced experts. The schematic  
689 overview of the DNM detection pipeline is shown in **Extended Data Fig. 16a**. VEP  
690 (v106) was used to annotate de novo variants with 1000 genomes (phase 3), COSMIC  
691 (92), ClinVar (202109), ESP (V2-SSA136), HGMD-PUBLIC (20204), dbSNP (154),  
692 GENCODE (Human Release 40), gnomAD (r2.1.1), PolyPhen (2.2.2) and SIFT (5.2.2).  
693 Mutational signatures were collected by Mutalisk<sup>54</sup> using linear regression.

694

#### 695 **DNM statistical confirmation**

##### 696 *Consensus region for DNM rate calculation*

697 To compare DNM rates and burden among sequencing data generated with different  
698 platforms (e.g., exome capture libraries), genomic regions that are commonly covered  
699 with sufficient coverage (that is, consensus region) were extracted. For each individual  
700 genome coverage was calculated using bedtools<sup>55</sup> (v 2.30.0) genomecov. Then, the  
701 coverage bedgraphs were merged into each trio using bedtools unionbedg, and only the  
702 regions with read depth  $\geq 12$  in all three family members were kept. Each family  
703 bedgraph was merged with bedgraphs of other families within each batch, to confirm if at  
704 least 70% of families covered that region. Finally, the batch bedgraphs were merged into  
705 a final consensus region, reaching 36,553,428 bp.

706

##### 707 *DNM rates examined with Poisson distribution*

708 DNMs located in the consensus region were collected, to confirm if the number of DNM  
709 per proband follows an expected Poisson distribution. Briefly, we assumed a cutoff of  
710 DNM count per proband from 1 to 20, generating DNM sets based on the cutoffs. Then,  
711 an expected Poisson distribution was generated per cutoff, with lambda as an average  
712 count of DNMs per proband (R dpoi). An observed distribution of DNMs per proband  
713 was calculated to be compared to the expected distribution, with Chi-Square goodness-of-  
714 fit test (R chisq.test). A cutoff of 7 DNMs per proband was set (**Extended Data Fig. 2c–**  
715 **2d**), removing five and one trios from MM and controls, respectively. The six samples  
716 with DNM counts larger than 7 were found to have DNMs ranging from 8 to 484,  
717 possibly owing to low data quality.

718

## 719 **DNM burden analysis**

720 DNM rates were calculated based on the number of DNMs observed in the consensus  
721 region, to properly compare the rates. We utilized a rate ratio test given that the number  
722 of DNMs per proband followed Poisson distribution. The DNMs were categorized into  
723 likely gene disrupting (LGD) including frameshift Indels, stop gained, and splice  
724 donor/acceptor mutations. Among the missense variants, if annotated as ‘probably  
725 damaging’ or ‘likely damaging’ in PolyPhen or ‘deleterious’ in SIFT, when CADD  
726 prediction score (>20) supports either at the same time, we annotated DNMs as damaging  
727 missense (D-Mis). If a DNM was annotated as D (deleterious) by a highly strict meta  
728 predictor MetaSVM<sup>56</sup>, we prioritized them as D-Mis-HC. We could replicate the highly  
729 consensus D-Mis mutations and their burden with two other independent missense  
730 variant annotation predictors, MetaLR<sup>56</sup> and REVEL<sup>57</sup> (**Supplementary Information**  
731 **and Extended Data Fig. 16b**). MetaSVM, MetaLR, and REVEL was annotated based  
732 on dbNSFP (4.1a). Missense mutations that were not annotated as D-Mis were  
733 categorized as ‘Tolerant missense’. Constrained genes were collected with pLI  $\geq$  0.9.  
734 DNM rate was calculated within the consensus region (36,553,428 bp) in the mutation  
735 categories, with 95% confidence intervals calculated (one sample t test). Two-sided  
736 Wilcoxon rank-sum test was utilized to confirm the difference of the total DNM rates  
737 between MM ( $n = 772$ ) and controls ( $n = 724$ ). Rate ratio test (one-sided) was used to  
738 compare two Poisson distributed rates from each cohort. Theoretical DNM rates were  
739 estimated based on the total size of the coding region in hg38 (59,281,518 bp). The  
740 percentage of the subjects with DNM mediating risk could be calculated by the difference  
741 between the theoretical rates (DNM rate per exome) of the MM and control (95% CI  
742 calculated with Wilcoxon rank-sum test, two-sided). The percentage of DNM carrying  
743 the MM risk was estimated by dividing the difference of theoretical rate by the theoretical  
744 rate of MM trios.

745

## 746 **Whole genome analysis**

747 We additionally recruited 101 trios and 1 quartet with MM and generated whole genome  
748 sequencing (WGS) data with Illumina HiSeq2500 and NovaSeq. The reads were  
749 preprocessed and aligned with the same pipeline of WES data. Same quality controls with  
750 WES data were applied, removing 4 trios that failed kinship integrity and contamination  
751 analyses. Small SNVs and Indels were collected with the same variant calling and  
752 filtering of WES analysis. We applied a binomial test to confirm if a DNM was derived  
753 from a heterozygous state as in WES, with applied stronger  $P$  value cutoff 0.05 compared  
754 to WES, as WGS data has much stable coverage with reduced capture bias and allelic  
755 imbalance. Additional populational allele frequency information (gnomAD genome  
756 v3.1.2) was added and SpliceAI (v1.3.1)<sup>58</sup> was utilized (score > 0.5) to predict splice  
757 disrupting variants. We annotated noncoding variants with GREEN-VARAN<sup>59</sup> (GREEN-  
758 DB schema 2.5) to annotate DNMs in noncoding regions. For copy number variant  
759 analysis (CNV), CNVpytor (1.3.1)<sup>60</sup> was utilized with a window size of 100 kbp, and  
760 manually curated by confirming the read depths of all father and mother. To  
761 comprehensively detect structural variants (SVs), we utilized Manta<sup>61</sup> (1.6.0), Delly<sup>62</sup>  
762 (v0.8.1), and smoove<sup>63</sup> (0.2.6) and merged the SV calls from the three callers with  
763 Survivor (1.0.7, parameter: dist=50000, callers=0, type=0, strands=0, estimate=0,

764 size=50000) to confirm if the detected SVs only present in probands.

765

### 766 **Multiplexed Error Robust In-Situ Hybridization (MERFISH)**

767 MERFISH was performed as described previously at the UCSD Epigenomics Core<sup>64</sup>.

768 Briefly, mouse embryos at day 10.5 were fixed in paraformaldehyde and cryopreserved in  
769 30% sucrose, embedded in Optimal cutting temperature (OCT) and sectioned into 12  $\mu\text{m}$   
770 sections in cryostat. These tissue sections then underwent fluorescent in situ hybridization  
771 with a panel of oligonucleotide probes specific for 36 of the genes identified from the  
772 current human DNM cohort along with 107 marker genes, chosen upon previously  
773 published single cell literatures to classify cell types into 7 cell types (neuron, neural  
774 progenitor, neural crest, pre-epithelial to mesenchymal transition neural crest progenitor  
775 (Pre-EMT-NCP), dorsal root ganglia, blood and mesoderm<sup>65-67</sup>. During downstream  
776 analysis marker genes were filtered to only include 66 the most efficient markers specific  
777 for each cell type (see **Supplementary Data** for a full list of utilized marker genes).

778 Probes were designed and manufactured with standard pipeline by Vizgen

779 (<https://vizgen.com/gene-panel/>). Tissue sections were prepared and processed using

780 Vizgen sample preparation protocol (Document Number 91600002 Rev A), then samples

781 placed in the Merscope for imaging and decoding (Document Number 91600001, Rev

782 G). Raw data was analyzed using Scanpy (1.9.1)<sup>68</sup>. Cells were preprocessed and filtered

783 using the following criteria: cells with volume less than 100  $\mu\text{m}^3$ , cells with volume

784 larger than 3x median volume of all cells, fewer than 4 genes detected, fewer than 10

785 transcripts detected, total RNA counts lower than the 2% quantile or higher than 98%

786 quantile. Preprocessed cells were clustered based on gene expression using the Leiden

787 algorithm (leidenalg 0.10.2), annotated using scType<sup>73</sup> (v1.0) based upon marker genes as

788 the reference set (see **Supplementary Information**). Clusters were annotated to the cell

789 type with the highest overall score from scType, accounting for expression of all marker

790 genes per cell type in a focal cluster, compared to the expression in other clusters.

791 Clusters with prediction score less than 0 or low confidence scores (score less than 10%

792 of the number of cells in each cluster) were classified as indeterminate as they could not

793 be classified in any of the 7 cell types. Expression of each of the 36 candidate genes was

794 then analyzed in each cell from raw data, and percentage of total average expression per

795 cell type calculated in **Extended Data Fig. 5**.

796

### 797 **Network analysis (co-localization and degree)**

798 Relationship between damaging DNMs in MM vs. control cohorts and the human

799 genome network were calculated using STRING (v11.5) for gene interactions. We

800 calculated the connectedness from the STRING database of damaging DNMs from MM

801 ( $n = 187$ ) and control ( $n = 135$ ) among 19,699 annotated genes, randomly resampled with

802 a size of 80% of the gene set from control ( $n = 108$ ), of 100,000 iterations. Number of

803 edges per iteration were compared with a Wilcoxon rank-sum test (two-sided). Edges per

804 nodes were compared between the cohorts (Wilcoxon rank-sum test, one-sided).

805

### 806 **Pathway enrichment analysis**

807 To estimate if the MM or control DNM gene sets were functionally enriched in known

808 biological pathways, gene ontology (GO) biological process, reactome, and KEGG

809 pathways, we conducted a gene enrichment analysis with ClueGO (v2.5.10) in Cytoscape

810 (3.10.1), with parameters set as Evidence All\_without\_IEA (Inferred from Electronic  
811 annotation), GO tree interval ranging from 3 to 8, and 5 minimum number of genes, 4%  
812 of genes for GO term selection, and 0.4 kappa score. We used adjusted  $P$  value with  
813 Bonferroni step-down with significance criterion 0.05. Detailed information of the GO  
814 enrichment test can be found in **Extended Data Table 3**. No significant term was  
815 observed with control gene sets.

816

### 817 **Sanger confirmation**

818 Out of 198 damaging DNMs, 86% (171 out of 198) where trio DNA samples were  
819 available for the Sanger sequencing confirmation, with sufficient DNA. For a subset of  
820 detected damaging DNMs, primer sets were generated via Primer3 and ordered from  
821 IDT. The primer lengths were configured to span a range of 18 bp to 23 bp, targeting an  
822 ideal size of 20 bp. The GC content was set to a minimum of 30% and a maximum of  
823 70%, and the annealing temperature was established to range between 57°C and 62°C,  
824 with an optimal temperature of 59°C. PCR was performed using the QIAGEN Taq DNA  
825 Polymerase kit and primer concentrations of 500 nM. Four reactions were performed per  
826 DNM, amplifying DNA from the father, mother, affected child, and an unrelated healthy  
827 individual. PCR products were confirmed by agarose gel electrophoresis, purified by  
828 incubation with Exonuclease I/Shrimp Alkaline Phosphatase (1:2), diluted in ddH<sub>2</sub>O, and  
829 shipped to Genewiz/Azenta for Sanger sequencing. Trace files were analyzed in  
830 SnapGene Viewer and compared against the UCSC Genome Browser to confirm that the  
831 affected child was heterozygous for the detected mutation and the father, mother, and  
832 control were homozygous for the reference base at the same locus.

833

### 834 **Network propagation and submodule identification**

835 A propagated network was constructed with NetColoc (0.1.7)<sup>69</sup>. PCNet<sup>70</sup> was utilized for  
836 the background human gene interaction network, which contains 18,820 nodes and  
837 2,693,109 edges. Among 187 MM genes, two genes (SLCO1B3-SLC01B7 and H3-4)  
838 couldn't be included as seeds because they couldn't be found in the PCNet. As  
839 implemented in NetColoc,  $w$  prime and  $w$  double prime value was calculated for each  
840 gene to generate  $z$  scores for proximity. We used the  $z$  score threshold 3 as default. The  
841 entire list of the genes in the propagated network can be found in **Supplementary Data**.  
842 Known mouse NTD genes ( $n = 374$ ) were based on previous literatures, where 205 genes  
843 were organized back in 2010<sup>30</sup> and the others were added from then (see **Supplementary**  
844 **Data** for the gene list). To examine the propagated network, we conducted a  
845 hypergeometric test, utilizing 18,820 as the total number of genes as in PCNet ( $M =$   
846 18,820), number of known NTD genes ( $n = 374$ ), the number of nodes in the propagated  
847 network ( $N = 439$ ), and the number of overlapping genes with propagated network and  
848 MM genes ( $k = 17$ ).

849

$$Pr(X = k) = f(k; M, n, N)$$

850 Then, to identify small functional modules from the expanded network, the propagated  
851 network was clustered with a Leiden algorithm with 0.5 resolution, 0.01 beta with 45  
852 iterations. To use co-expression value as attributes, we again transferred the propagated  
853 network to STRING database (v12) with Homo Sapiens full STRING network, popping  
854 out 114 nodes without edges to the network, meaning discrepant sources of protein  
855 network. In total, 15 small clusters were generated with more than five nodes. Five could

856 be significantly enriched by functional biological terms ( $FDR < 10^{-5}$ ) by the GO  
857 biological process, KEGG pathway without disease related terms, and Reactome, which  
858 had more than 30% of the nodes derived from damaging DNMs (**Supplementary Data**).  
859 Two clusters annotated as ‘GTPase involved actin cytoskeleton’ and ‘Microtubule-based  
860 process’ were enriched with functional terms with most significant  $P$  values ( $FDR < 10^{-8}$ ),  
861 with 8 and 4 terms respectively. The pLI of the genes in the five functional modules  
862 can be found in **Supplementary Data**.

863

#### 864 **Cloning**

865 Patient DNMs were mutagenized into wildtype (WT) cDNA using Gibson Assembly  
866 cloning. These mutations include p.R231G (R230G in mouse) in *Vwa8b* (mouse),  
867 p.E521Q and p.E623Q in *PLCE1* (human), p.P168L in *TNK2*, p.H1149P *TIAM1*,  
868 p.R620H in *BRSK2* (human) and p.R349C in *CLIP2* (rat). For each of the plasmids,  
869 overlapping (40 bp) forward and reverse primers with 20 bp 5' overhangs were designed  
870 complementary to the mutation site, with a single nucleobase difference corresponding to  
871 the mutation of interest (**Supplementary Data**). 15 ng plasmid DNA was amplified using  
872 the NEB Phusion High-Fidelity 2X Master Mix [NEB #M0531] for 25 cycles, after  
873 which the reaction was subjected to 1 hour at 50°C with NEBuilder HiFi DNA Assembly  
874 2X Master Mix [NEB #E2621], and the reaction mixture was treated with *DpnI* [NEB  
875 #R0176] digestion for 37°C for 30 minutes. 2  $\mu$ L of the reaction mixture was then  
876 transformed into NEB DH5-alpha Competent *E. coli* [NEB #C2987], with successful  
877 mutation verified using Primordium whole plasmid sequencing.

878

#### 879 **Protein analysis**

##### 880 ***TNK2***

##### 881 *Cell transfection, lysis, and Western blotting*

882 Human embryonic kidney (HEK)293T cells (from American Type Culture Collection)  
883 were maintained in DMEM (Corning) supplemented with 10% fetal bovine serum  
884 (Sigma) and 1X penicillin and streptomycin. The cells were transfected according to the  
885 protocol supplied with TransIT reagent (Mirus) using 7.5  $\mu$ g of DNA. After 48 hours, the  
886 cells were harvested, washed with phosphate-buffered saline, and lysed in a buffer  
887 containing 25 mM Tris-HCl (pH 7.5), 100 mM NaCl, 1 mM EDTA, 1% Nonidet P-40, 5  
888  $\mu$ g/ml leupeptin, 5  $\mu$ g/ml aprotinin, 1mM PMSF, and 200  $\mu$ M Na<sub>3</sub>VO<sub>4</sub>. Cell lysis  
889 proceeded for 30 minutes at 4°C with rocking. The cell suspensions were centrifuged at  
890 15,000 rpm for 10 minutes, and protein concentrations of the soluble lysates were  
891 measured using a colorimetric Bradford assay. The lysates (100  $\mu$ g) were analyzed by  
892 SDS-PAGE and Western blotting using the following antibodies: phospho-Ack1/Tnk2  
893 (Millipore Sigma 09-142), Flag (Sigma-Aldrich A8592), and gamma-tubulin (Sigma-  
894 Aldrich T6557).

895

##### 896 *Immunoprecipitation (IP) Kinase assay*

897 IP-kinase assays were performed essentially as described with the following  
898 modifications: HEK293T lysates (1 mg) were incubated with 40  $\mu$ L of anti-Flag M2  
899 affinity resin (Sigma) on a rotator at 4°C overnight, then washed three times with Tris-  
900 buffered saline (TBS). The IPs were divided into three portions. One portion of each  
901 sample was mixed with a gel-loading buffer, boiled for 3 minutes, and analyzed by 7.5%



902 SDS/PAGE with anti-Flag Western blotting. The remaining two samples were used for  
903 duplicate activity measurements using the phosphocellulose paper-binding assay. The  
904 reactions contained 20 mM Tris-HCl (pH 7.4), 10 mM MgCl<sub>2</sub>, 0.25 mM ATP, 1 mM  
905 WASP peptide (KVIYDFIEKKG) and 20–50 cpm/pmol of [ $\gamma$ -<sup>32</sup>P] ATP. Reactions were  
906 carried out at 30 °C for 15 min. Incorporation of <sup>32</sup>P into peptide was measured by  
907 scintillation counting.

908

## 909 ***TIAM1***

### 910 *DNA Reagents*

911 The following constructs were previously described: pCMV-EGFP<sup>71</sup>, pCMV-Flag-Tiam1  
912 (WT-Tiam1)<sup>72</sup>, pRaichu-RaichuEV-Rac1 (2248X)<sup>73</sup>, pcDNA3.1 vector<sup>74</sup>. mRuby3 was  
913 obtained from Addgene (127808).

914

### 915 *Cell culture and transfections*

916 Cos-7 cells were grown in Dulbecco's modified Eagle's medium (DMEM) (Corning 10-  
917 013-CV) supplemented with 100 U/ml penicillin/streptomycin (Invitrogen 15140122) and  
918 10% heat inactivated fetal bovine serum (Atlanta Biologicals S11150H) on cell culture-  
919 treated plastic (VWR 10062-880) maintained at 5% CO<sub>2</sub>, 37°C. Cells were passaged with  
920 trypsin (Invitrogen 25200072) once per week. For experiments, 24 hrs prior to transfection  
921 cells were plated on either nitric acid washed glass cover slips (Bellco Glass 1943-10012A)  
922 or glass bottom plates (Cellvis P241.5HN) coated with 20 ug/ml Poly-D-Lysine (Corning  
923 354210). Cells were transfected using Jetprime reagent (Polyplus 101000046) according  
924 to the manufacturer recommendations. Twenty-four hours after transfections cells were  
925 changed to serum-free DMEM. For live cell experiments, phenol-red free DMEM (Corning  
926 17-205-CV) was used. Experiments were conducted 48 hours after transfection.

927

### 928 *Immunocytochemistry, microscopy, and analysis*

929 Cells were fixed with 4% Paraformaldehyde (Fisher Scientific AC169650010), 4%  
930 Sucrose (Sigma S0389) in phosphate buffered saline (PBS). To confirm construct  
931 expression, following fixation all cells were immunostained overnight at 4°C with anti-  
932 Flag (Cell Signaling 14793S) primary antibody diluted in 0.3% Triton X-100, 5% goat  
933 serum in PBS. After, cells were incubated with Cy5 anti-Rabbit secondary antibody  
934 (Jackson ImmunoResearch 111-175-003) for 2 hrs at room temperature. For filamentous  
935 actin experiments, cells were also incubated with Texas Red-Phalloidin (Invitrogen  
936 T7471) during this time. Post-fixation and staining, cells grown in glass coverslips were  
937 mounted using the aqueous mounting solution FluorSave (EMD Millipore 345789).

938

### 939 *Imaging*

940 Filamentous actin was labeled with Texas Red phalloidin, then imaged using a Zeiss  
941 AxioObserver.Z1 microscope with a 20x objective. Rac1 activation was measure in cells  
942 transfected with the RaichuEV-Rac1 probe, imaged on a Zeiss LSM 880 confocal  
943 microscope at 20x. Live imaging experiments were conducted at 37°C/5% CO<sub>2</sub>. Single  
944 plane images were acquired with Förster resonance energy transfer (FRET) (excitation 458  
945 nm, emission 522–569 nm), CFP (Donor) (excitation 458 nm, emission 463–507 nm), and  
946 YFP (Acceptor) (excitation 514 nm, emission 522–569 nm), presented as normalized  
947 FRET/Donor values using ImageJ (NIH). Only cells expressing constructs were selected

948 for analysis. GFP or mRuby3 fill visualized cell morphology via ROI cell trace, measured  
949 for mean intensity, corrected for background, and normalized to respective controls.  
950 Experiments were conducted with experimenters blinded to conditions. Representative  
951 images were masked using ImageJ (NIH).

952

### 953 ***VWA8***

954 Plasmid transfection in HEK293T cells was performed using the ThermoFisher  
955 Lipofectamine 2000 transfection reagent. HEK293T cells seeded on a 6 well plate and  
956 transfected with 4ug of plasmid. Cells were lysed using Modified RIPA buffer 72 days  
957 post-transfection, and the lysate was spun down at 10,000g in a microcentrifuge and  
958 supernatant was harvested. Empty vector, WT, and R230G protein was then quantified  
959 using the Pierce BCA Assay kit (Thermo Scientific #23225), and 10 µg protein lysate  
960 was diluted in 4X SDS-PAGE Loading Buffer supplemented with 10% β-  
961 mercaptoethanol (Sigma #M3148) and loaded into each well of an Any kDa Bio-Rad  
962 Mini-PROTEAN TGX [4569031] gel, and run for 30 minutes at 150 V. Proteins were  
963 then transferred onto a nitrocellulose membrane [Sigma #IPVH00010] and blocked with  
964 5% BSA (Sigma #A9418) in TBST (blocking buffer) for 1 hour at room temperature. The  
965 membrane was then blotted with 1:1000 Anti-HA (#sc-805) and 1:5000 Anti-alpha-  
966 tubulin (Sigma #T6074) primary antibody in blocking buffer overnight at 4°C under  
967 constant rocking. The following day the membrane was washed 4 times in TBST for 10  
968 minutes, followed by 1 hour incubation in a 1:10000 anti-mouse (#715-035-150) and anti-  
969 rabbit (#711-036-152) HRP-conjugated secondary antibody in blocking buffer at room  
970 temperature. The membrane was then washed again for 4 times in TBST for 10 minutes,  
971 after which the membrane was treated with Pierce ECL Western solution for HRP  
972 detection (Thermo Scientific #32106) for 5 minutes at room temperature. The membrane  
973 was then transferred into a clear plastic cover and imaged using a chemiluminescence  
974 detector (Biotechnology #92-14860). Quantification of protein band intensity was  
975 accomplished using the ImageJ band densitometry plugin, and final plots were created  
976 using Prism.

977

### 978 ***CLIP2***

#### 979 *Western blot*

980 HEK293T cells were transfected with pEGFP-CLIP2 WT, R349C (TGC or TGT) either  
981 with constitutively active AKT pE17K (Addgene #73050) or empty vector using  
982 Lipofectamine as previously described, lysed into sample buffer, and analyzed by  
983 western using anti-GFP antibody (1:200 Thermo Scientific #GF28R).

984

#### 985 *Microtubule analysis*

986 HuH7 cells cultured in DMEM with 10% fetal calf serum (Sigma) and 1% antibiotic-  
987 antifungal mixture (Gibco) were transfected with pEGFP-CLIP2 WT, R349C or S352A  
988 (Turbofect, ThermoFisher Scientific #R0531). Time-lapse sequences ( $\Delta t = 2.4$  s, 80 frames)  
989 of the CLIP2 fluorescence signal were captured using a Leica DMLB microscope through  
990 a 100x 1.3 NA objective and a Scion CFW1312M camera. The parameters of microtubule  
991 dynamics were computed as previously described<sup>75</sup>. Statistical comparisons were  
992 performed using one-factor ANOVA.

### 993 ***PLCE1***

994 *Cell transfection and lysis*

995 Plasmid expressing PLCE1 including the WT, p.E521Q, and p.E623Q mutations were  
996 transfected into HEK293 cells and were maintained in DMEM supplemented with 10%  
997 FBS and 1% penicillin/streptomycin. Plasmids were transfected into HEK293 cells using  
998 Lipofectamine (Invitrogen), grown for 48 hr and lysed in lysis buffer (1% Triton X-100,  
999 50 mM Tris pH 7.4, 10 mM MgCl<sub>2</sub>, 500 NaCl) with added protease inhibitors (Roche).  
1000 The lysates were spun down at 20000 g/4°C/15 min and the supernatants were used for  
1001 overnight incubation with 20 µl of GST beads containing GST recombinant proteins on  
1002 the rotator. After the incubation samples were washed with 800 µl lysis buffer, the GST  
1003 beads were collected at 500 g/4°C/2 min, the supernatants were aspirated out and this  
1004 washing was repeated 3 times. Proteins were eluted with 20 µl of 2x Laemmli buffer.  
1005

1006 *Pulldown assay*

1007 Eluted proteins were diluted in 4X SDS-PAGE Loading Buffer supplemented with 10%  
1008 β-mercaptoethanol (Sigma #M3148) and loaded into each well of an Any kDa Bio-Rad  
1009 Mini-PROTEAN TGX gel, and run for 30 minutes at 150 V, samples transferred to  
1010 PVDF membrane (Sigma #IPVH00010), blocked with 5% BSA (Sigma #A9418) in  
1011 TBST for 1h at RT, membrane blotted with 1:1000 anti-RAC1, 1:1000 anti-CDC42,  
1012 1:1000 anti-RHOA, and 1:1000 anti-Myc, washed in TBST for 10min then blotted with  
1013 1:10000 anti-mouse (#715-035-150) and anti-rabbit (#711-036-152) HRP-conjugated  
1014 antibody, washed in TBST for 10m, then developed in Pierce ECL Western solution  
1015 (Thermo Scientific #32106) for 5min, and imaged using a chemiluminescence detector  
1016 [Biotechnology #92-14860], and band intensity quantified using ImageJ band  
1017 densitometry, and plotted using Prism.  
1018

1019 The GST-PAK1 beads (#PAK02-A) and GST-rhotekin RBD beads (#RT02-A) were  
1020 purchased from Cytoskeleton. Anti-Myc (#2278; Cell Signaling Tech.), anti-RhoA  
1021 (#2117; Cell Signaling Tech.), anti-Rac1 (#610650; BD Transduction Labs), anti-Cdc42  
1022 (#610928; BD Transduction Labs) were purchased from the indicated commercial  
1023 sources.  
1024

1025 ***BRSK2 Western Blot***

1026 HEK293T cells were transfected with the pEXP-CMV-BRSK2-Flag plasmid containing  
1027 wildtype, K48A kinase-dead mutant, and R620H patient mutation BRSK2 sequence  
1028 using PEI (Sigma Millipore #919012) and OptiMEM (Gibco #31985-070) according to  
1029 the manufacturer's guidelines. Protein concentration of lysates was measured using the  
1030 Pierce BCA Protein Assay Kit (Thermo Scientific #23225), then 20 µg of protein was  
1031 loaded into each well of a 4-12% Bis-Tris Gel (Invitrogen #NP0336), transferred to  
1032 nitrocellulose membranes (Thermo, #88018), blocked then blotted with one of the  
1033 following primary antibodies: 1:1000 Flag rabbit (Cell Signaling Technology #14793S),  
1034 1:1000 Beta-actin rabbit (Sigma #A5316), 1:1000 anti-Phospho-AMPK Substrate Motif  
1035 rabbit (Cell Signaling Technology #5759) and 1:1000 mTOR rabbit (Cell Signaling  
1036 Technology #2983), 1:1000 P-mTOR Ser 2448 rabbit (Cell Signaling Technology  
1037 #5536), 1:1000 p70 S6 Kinase rabbit (Cell Signaling Technology #34475), 1:1000  
1038 Phospho-p70 S6 Kinase Thr 389 rabbit (Cell Signaling Technology #9234), 1:1000 4E-  
1039 BP1 rabbit (Cell Signaling Technology #9644) and 1:1000 Phospho-4E-BP1 Thr 37/46

1040 rabbit (Cell Signaling Technology #2855) at 4°C overnight, rinsed in TBST for 10  
1041 minutes, incubated with LI-COR IRDye 680 Donkey anti-Mouse or 800 Donkey anti-  
1042 Rabbit (LI-COR #926-68072, #926-32213) 1:10,000 rinsed in TBST and imaged on an  
1043 Odyssey CLx using Image Studio software for analysis of band intensity.

1044

### 1045 ***Xenopus* modeling**

1046 *Xenopus* embryo manipulations were conducted according to established protocols<sup>76</sup>.  
1047 Female adult *Xenopus laevis* were induced to ovulate by the injection of human chorionic  
1048 gonadotropin, and *in vitro* fertilization was performed by homogenizing a small piece of  
1049 a testis. Embryos were dejellied in 1/3 X Marc's Modified Ringer's (MMR) with 2.5%  
1050 (w/v) cysteine (pH7.9) at the 2-cell stage and were microinjected with either gene-  
1051 specific MO or mock into two dorsal blastomeres at the 4-cell stage in 2% Ficoll (w/v) in  
1052 1/3 X MMR. Injected embryos were incubated at 18°C until stage 19 and fixed with 1X  
1053 MEMFA (0.1 M MOPS, 2mM EGTA, 1 mM MgSO<sub>4</sub>, 3.7% formaldehyde, pH 7.4). The  
1054 gene sequence for *Xenopus* Whamm was obtained from Xenbase  
1055 (<http://www.xenbase.org>). A Morpholino antisense oligonucleotide (MO) against  
1056 Whamm was designed to block mRNA splicing (Gene Tools) 5' –  
1057 AAAAGTAGGAAGAAGCCCCACCCT -3'. The Whamm open reading frame was  
1058 amplified from *Xenopus* cDNA and cloned into the pCS10R MCC vector containing GFP  
1059 tag. Capped mRNA was synthesized using the mMESSAGING mMACHINE SP6  
1060 transcription kit (Invitrogen Ambion, cat# AM1340), and injected to assess rescue. To  
1061 measure the distance of the neural folds, *in situ* hybridization against Pax3 was performed  
1062 as previously described<sup>76</sup>. Images were captured using a ZEISS Axio Zoom V16  
1063 stereomicroscope and associated Zen software, and neural folds visualized by pax3 were  
1064 analyzed in Fiji. To verify the efficiency of MO, MO was injected into all cells at the 4-  
1065 cell stage, and total RNAs were extracted from four embryos using the TRIZOL reagent  
1066 (Invitrogen, cat # 15596026). cDNAs were synthesized using M-MLV reverse  
1067 Transcriptase (Invitrogen, cat#28025013) and random primers (NEB, cat#S1330S).  
1068 cDNAs were amplified by Taq polymerase (NEB, cat# M02735) using the following  
1069 primers: 5'-CGGTGCAGGACTTGGATTAT-3', 5'-  
1070 CCCATTTAGCTACCTCCTTCTG-3'.

1071

## 1072 **Data Availability**

1073 Exome and genome sequencing data are available in publicly accessible databases for the  
1074 1,576 subjects enrolled after inclusion of dbGaP language into the consenting process/  
1075 became standard. These data are at dbGaP (accession #phs002591.v1.p1,  
1076 phs000744.v5.p2 (Yale Mendelian Sequencing Center), Kids First: Whole Genome  
1077 Sequencing in Structural Defects of the Neural Tube Accession (phs002591.v1.p1).  
1078 Sequencing data on the remaining 743 subjects is available upon request.  
1079

## 1080 **Code Availability**

1081 Computational codes used in this study are available in GitHub  
1082 ([https://github.com/Gleeson-Lab/Publications/tree/main/MM\\_DNM](https://github.com/Gleeson-Lab/Publications/tree/main/MM_DNM)).  
1083

## 1084 **Acknowledgement**

1085 We especially thank the families and the individuals with meningomyelocele that  
1086 participated in this study, Kiely James, Renee George, Brett Copelande, Valentina  
1087 Stanley, Celine Shen, and Jennifer Venneri from the Spina Bifida Sequencing  
1088 Consortium, the Spina Bifida Association, the UCSD Laboratory for Pediatric Brain  
1089 Disease for clinical and technical support, Brin Rosenthal and Katie Fisch from the  
1090 UCSD Altman Clinical and Translational Research Institute for statistical modeling,  
1091 Broad Institute, Yale Genetic Center, Regeneron Genetics Center, UCSD Institute for  
1092 Genomic Medicine, UC Irvine Sequencing Center and Rady Children Institute for  
1093 Genomics Medicine for sequencing support, Barbara Craddock from Stony Brook  
1094 University for functional analysis of TNK2, and the Spina Bifida Association for  
1095 recruitment efforts.  
1096

## 1097 **Funding**

1098 This work was supported by the Center for Inherited Disease Research grant  
1099 HHSN268201700006I, the Yale Center for Genomic Analysis, the Broad Institute, the  
1100 UC Irvine Genomics Core, the UCSD Institute for Genomic Medicine, the UCSD  
1101 Imaging Core, X01HD100698, X01HD110998, HD114132, P01HD104436,  
1102 U54OD030187, and support from the Howard Hughes Medical Institute and Rady's  
1103 Children Institute for Genomic Medicine to JGG. YJH and SK were supported by the  
1104 National Research Foundation of Korea funded by the Ministry of Science and ICT  
1105 (MSIT) (RS-2023-00277314). WTM was supported by VA Merit Award # I01  
1106 BX006248.  
1107

## 1108 **Spina Bifida Sequencing Consortium members**

1109 Dr. Allison Elizabeth Ashley Koch, PhD (Duke University), Dr. Kit Sing Au, PhD and  
1110 Dr. Hope Northrup, MD (University of Texas, Houston), Dr. Gyang Markus Bot, MD  
1111 (Jos University Teaching Hospital, Jos, Nigeria), Valeria Capra, MD (IRCCS Istituto  
1112 Giannina Gaslini, Italy), Dr. Richard H. Finnell, PhD, DABMGG (Baylor College of  
1113 Medicine), Dr. Zoha Kibar, PhD (Université de Montréal, Canada), Dr. Philip J. Lupo,  
1114 PhD, MPH (Baylor College of Medicine), Dr. Helio R. Machado, MD (University of Sao  
1115 Paulo, Brazil), Dr. Tony Magana, MD (Mekelle University, Mekelle, Ethiopia), Dr. Rony  
1116 Marwan, MD (University of Colorado), Dr. Gia Melikishvili, MD (MediClub Georgia,

1117 T'bilisi, Georgia), Dr. Osvaldo M. Mutchinick, MD, PhD (Salvador Zubirán National  
1118 Institute of Health Sciences and Nutrition, Mexico City, Mexico), Dr. Roger E.  
1119 Stevenson, MD (Greenwood Genetic Center), Dr. Anna Yurrita, MD (Francisco  
1120 Marroquín University, Guatemala City, Guatemala), Dr. Maha S. Zaki, MD, PhD  
1121 (National Research Center, Cairo, Egypt), Dr. Sara Mumtaz, PhD (National University of  
1122 Medical Sciences, Rawalpindi, Pakistan), Dr. José Ramón Medina-Bereciartu, MD  
1123 (Venezuela Association of Spina Bifida, Caracas, Venezuela), Dr. Friedhelm Hildebrandt  
1124 (Boston Children's Hospital, Harvard Medical School), Dr. Caroline M. Kolvenbach, MD  
1125 (Boston Children's Hospital, Harvard Medical School), Shirlee Shril, MS (Boston  
1126 Children's Hospital, Harvard Medical School), Dr. Mahmoud M. Noureldeen, MD and  
1127 Dr. Aida MS. Salem, MD (Beni-Suef University, Beni-Suef, Egypt), Dr. Joseph Gleeson,  
1128 MD (UC San Diego).

1129

### 1130 **Author Contributions**

1131 Y-JH, CW, NM FJ, KIV, CB, SL, NJ, AP recruited subjects and performed genetic  
1132 analysis. IJ performed MERFISH analysis, CJL and JBW generated *Xenopus* data. AN,  
1133 J-EL, IT, FAB, KFT, SY, HJ, BB WTM, CH, SAM, HYG, BB, CP performed functional  
1134 analysis, ZK GMB, HN, KSU, MS, AA-K, RHF, JL, HM, CA, HRM, RES, AY, SM,  
1135 OMM, JRM-B, FH, GM, RM, VC, MMN, AMSS, MYI, MSZ recruited families. AA,  
1136 ARS, SWK, performed sequencing. Y-JH, SK and JGG performed analysis, wrote drafts,  
1137 and incorporated feedback from coauthors.

1138

### 1139 **Competing interests**

1140 AA and ARS are full time employees of Regeneron Genetics Center. SK is cofounder of  
1141 AIMA Inc., which seeks to develop techniques for early cancer diagnosis based on  
1142 circulating tumor DNA.

1143

### 1144 **Additional Information**

1145 Supplementary Information is available, containing Supplementary Table and  
1146 Supplementary Notes.

1147

### 1148 **Method references**

1149

- 1150 52 Rendeli, C. *et al.* Assessment of health status in children with spina bifida. *Spinal*  
1151 *Cord* **43**, 230-235 (2005). <https://doi.org/10.1038/sj.sc.3101707>
- 1152 53 Dimitromanolakis, A., Paterson, A. D. & Sun, L. Fast and accurate shared  
1153 segment detection and relatedness estimation in un-phased genetic data via  
1154 TRUFFLE. *Am J Hum Genet* **105**, 78-88 (2019).  
1155 <https://doi.org/10.1016/j.ajhg.2019.05.007>
- 1156 54 Lee, J. *et al.* Mutalisk: a web-based somatic MUTation AnaLyIS toolKit for  
1157 genomic, transcriptional and epigenomic signatures. *Nucleic Acids Res* **46**, W102-  
1158 W108 (2018). <https://doi.org/10.1093/nar/gky406>
- 1159 55 Quinlan, A. R. & Hall, I. M. BEDTools: a flexible suite of utilities for comparing  
1160 genomic features. *Bioinformatics* **26**, 841-842 (2010).  
1161 <https://doi.org/10.1093/bioinformatics/btq033>

- 1162 56 Dong, C. *et al.* Comparison and integration of deleteriousness prediction methods  
1163 for nonsynonymous SNVs in whole exome sequencing studies. *Hum Mol Genet*  
1164 **24**, 2125-2137 (2015). <https://doi.org/10.1093/hmg/ddu733>
- 1165 57 Ioannidis, N. M. *et al.* REVEL: An ensemble method for predicting the  
1166 pathogenicity of rare missense variants. *Am J Hum Genet* **99**, 877-885 (2016).  
1167 <https://doi.org/10.1016/j.ajhg.2016.08.016>
- 1168 58 Jaganathan, K. *et al.* Predicting splicing from primary sequence with deep  
1169 learning. *Cell* **176**, 535-548 e524 (2019).  
1170 <https://doi.org/10.1016/j.cell.2018.12.015>
- 1171 59 Giacobuzzi, E., Popitsch, N. & Taylor, J. C. GREEN-DB: a framework for the  
1172 annotation and prioritization of non-coding regulatory variants from whole-  
1173 genome sequencing data. *Nucleic Acids Res* **50**, 2522-2535 (2022).  
1174 <https://doi.org/10.1093/nar/gkac130>
- 1175 60 Suvakov, M., Panda, A., Diesh, C., Holmes, I. & Abyzov, A. CNVpytor: a tool  
1176 for copy number variation detection and analysis from read depth and allele  
1177 imbalance in whole-genome sequencing. *Gigascience* **10** (2021).  
1178 <https://doi.org/10.1093/gigascience/giab074>
- 1179 61 Chen, X. *et al.* Manta: rapid detection of structural variants and indels for  
1180 germline and cancer sequencing applications. *Bioinformatics* **32**, 1220-1222  
1181 (2016). <https://doi.org/10.1093/bioinformatics/btv710>
- 1182 62 Rausch, T. *et al.* DELLY: structural variant discovery by integrated paired-end  
1183 and split-read analysis. *Bioinformatics* **28**, i333-i339 (2012).  
1184 <https://doi.org/10.1093/bioinformatics/bts378>  
1185 <https://github.com/brentp/smoove>.
- 1186 64 Chen, K. H., Boettiger, A. N., Moffitt, J. R., Wang, S. & Zhuang, X. RNA  
1187 imaging. Spatially resolved, highly multiplexed RNA profiling in single cells.  
1188 *Science* **348**, aaa6090 (2015). <https://doi.org/10.1126/science.aaa6090>
- 1189 65 Delile, J. *et al.* Single cell transcriptomics reveals spatial and temporal dynamics  
1190 of gene expression in the developing mouse spinal cord. *Development* **146** (2019).  
1191 <https://doi.org/10.1242/dev.173807>
- 1192 66 Soldatov, R. *et al.* Spatiotemporal structure of cell fate decisions in murine neural  
1193 crest. *Science* **364** (2019). <https://doi.org/10.1126/science.aas9536>
- 1194 67 Simoes-Costa, M. & Bronner, M. E. Establishing neural crest identity: a gene  
1195 regulatory recipe. *Development* **142**, 242-257 (2015).  
1196 <https://doi.org/10.1242/dev.105445>
- 1197 68 Wolf, F. A., Angerer, P. & Theis, F. J. SCANPY: large-scale single-cell gene  
1198 expression data analysis. *Genome Biol* **19**, 15 (2018).  
1199 <https://doi.org/10.1186/s13059-017-1382-0>
- 1200 69 Rosenthal, S. B. *et al.* Mapping the common gene networks that underlie related  
1201 diseases. *Nat Protoc* **18**, 1745-1759 (2023). [https://doi.org/10.1038/s41596-022-](https://doi.org/10.1038/s41596-022-00797-1)  
1202 [00797-1](https://doi.org/10.1038/s41596-022-00797-1)
- 1203 70 Huang, J. K. *et al.* Systematic evaluation of molecular networks for discovery of  
1204 disease genes. *Cell Syst* **6**, 484-495 e485 (2018).  
1205 <https://doi.org/10.1016/j.cels.2018.03.001>

- 1206 71 Duman, R. S., Sanacora, G. & Krystal, J. H. Altered connectivity in depression:  
1207 GABA and glutamate neurotransmitter deficits and reversal by novel treatments.  
1208 *Neuron* **102**, 75-90 (2019). <https://doi.org/10.1016/j.neuron.2019.03.013>  
1209 72 Tolia, K. F. *et al.* The Rac1-GEF Tiam1 couples the NMDA receptor to the  
1210 activity-dependent development of dendritic arbors and spines. *Neuron* **45**, 525-  
1211 538 (2005). <https://doi.org/10.1016/j.neuron.2005.01.024>  
1212 73 Komatsu, N. *et al.* Development of an optimized backbone of FRET biosensors  
1213 for kinases and GTPases. *Mol Biol Cell* **22**, 4647-4656 (2011).  
1214 <https://doi.org/10.1091/mbc.E11-01-0072>  
1215 74 Duman, J. G. *et al.* The adhesion-PCR BAI1 shapes dendritic arbors via Bcr-  
1216 mediated RhoA activation causing late growth arrest. *Elife* **8** (2019).  
1217 <https://doi.org/10.7554/eLife.47566>  
1218 75 Henrie, H. *et al.* Stress-induced phosphorylation of CLIP-170 by JNK promotes  
1219 microtubule rescue. *J Cell Biol* **219** (2020). <https://doi.org/10.1083/jcb.201909093>  
1220 76 Sive, H., Grainger, Robert M, and Harland, Richard M. *Early development of*  
1221 *Xenopus Laevis: a laboratory manual.*, (2000).  
1222 77 Samocha, K. E. *et al.* A framework for the interpretation of de novo mutation in  
1223 human disease. *Nat Genet* **46**, 944-950 (2014). <https://doi.org/10.1038/ng.3050>  
1224 78 Misra, S. N. & Kearney, J. A. Alphabet Soup: Recurrent de novo mutations in  
1225 novel genes causing developmental and epileptic Ecephalopathies. *Epilepsy Curr*  
1226 **18**, 125-127 (2018). <https://doi.org/10.5698/1535-7597.18.2.125>  
1227 79 Homsy, J. *et al.* De novo mutations in congenital heart disease with  
1228 neurodevelopmental and other congenital anomalies. *Science* **350**, 1262-1266  
1229 (2015). <https://doi.org/10.1126/science.aac9396>  
1230 80 Ianevski, A., Giri, A. K. & Aittokallio, T. Fully-automated and ultra-fast cell-type  
1231 identification using specific marker combinations from single-cell transcriptomic  
1232 data. *Nat Commun* **13**, 1246 (2022). <https://doi.org/10.1038/s41467-022-28803-w>  
1233 81 Ten Klooster, J. P. *et al.* Interaction between Tiam1 and the Arp2/3 complex links  
1234 activation of Rac to actin polymerization. *Biochem J* **397**, 39-45 (2006).  
1235 <https://doi.org/10.1042/BJ20051957>  
1236 82 Yoo, S., Kim, Y., Lee, H., Park, S. & Park, S. A gene trap knockout of the Tiam-1  
1237 protein results in malformation of the early embryonic brain. *Mol Cells* **34**, 103-  
1238 108 (2012). <https://doi.org/10.1007/s10059-012-0119-x>  
1239 83 Zhao, L. *et al.* Bhlhe40/Sirt1 axis-regulated mitophagy is implicated in all-trans  
1240 retinoic acid-induced spina bifida aperta. *Front Cell Dev Biol* **9**, 644346 (2021).  
1241 <https://doi.org/10.3389/fcell.2021.644346>  
1242



1243 **Extended Data Figure**

1244

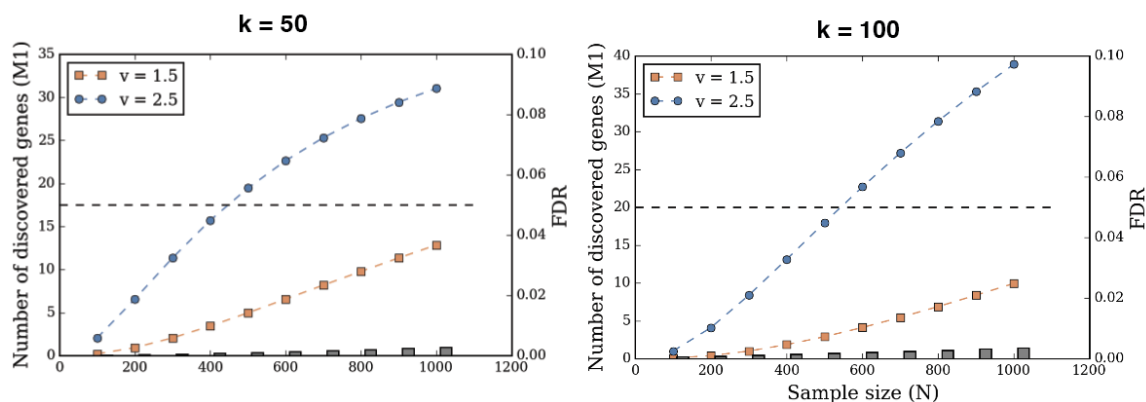

1245

1246 **Extended Data Figure 1. Power calculation of estimating a cohort size for DNM**

1247 **detection.** Power calculation showing potential number of discovered genes compared  
1248 with cohort size (350 trios), for two different v values (enrichment ratio of loss of  
1249 function variants in case versus control) and two different k values (assumed number of  
1250 risk genes). For instance, if there are 50 genes to discover (k=50), a cohort of 400 trios  
1251 will identify 16 genes if LOF variants are 2.5x more common in affected (v=2.5). All  
1252 calculations manage a conservative false discovery rate (FDR). Gray dash: FDR.

1253

1254

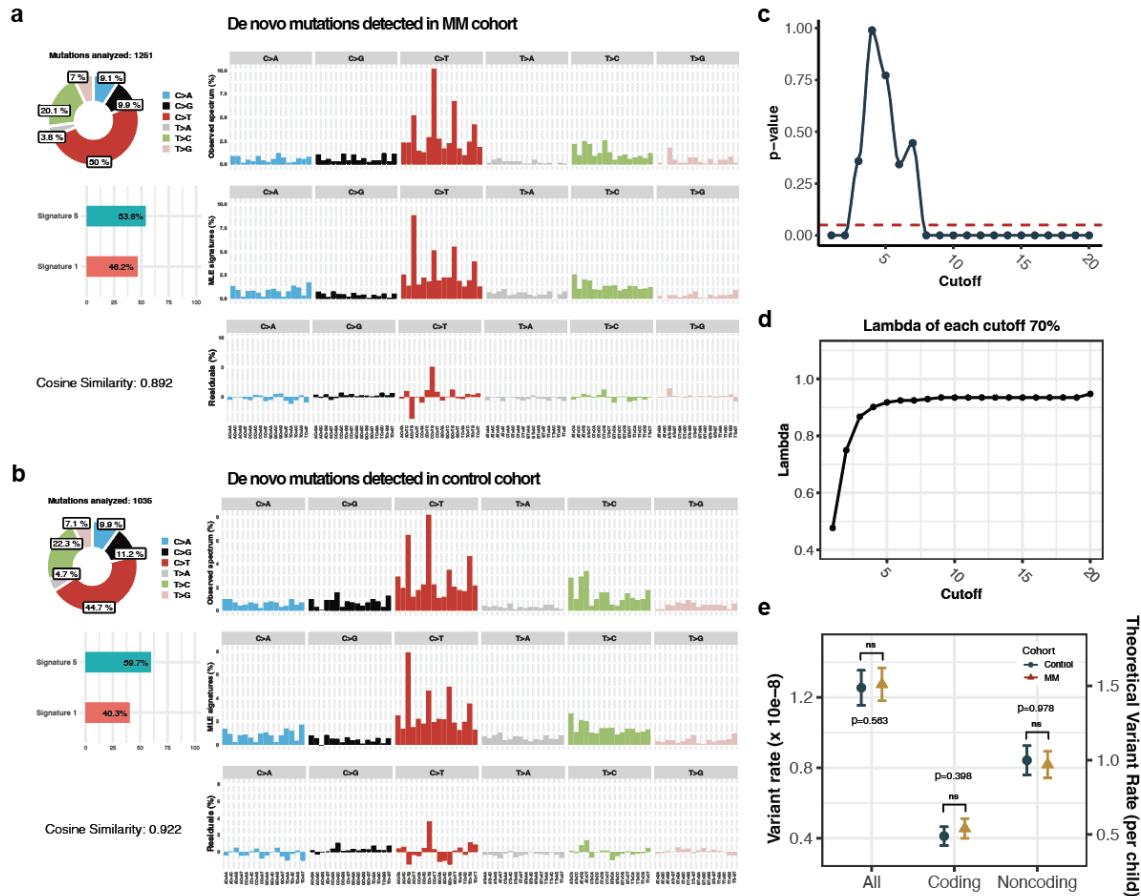

1255  
1256  
1257  
1258  
1259  
1260  
1261  
1262  
1263  
1264  
1265  
1266

**Extended Data Figure 2. Quantitative and qualitative features of de novo variants.** **a-b**, Mutational signatures of DNMs showing known de novo signatures 1 and 5, in both **(a)** MM and **(b)** control cohorts. 1,251 and 1,035 SNVs were utilized for the signature analysis. **c-d**, DNM counts per proband following Poisson distribution, examined based on cutoffs (DNM count per proband) ranging from 1 to 20. **(c)** Chi-Square goodness-of-fit (two sided) was performed with an expected Poisson distribution with **(d)** lambda as an average DNM count per proband, for all cutoffs (see **Methods**). **e**, DNM rates for all, coding, and noncoding regions. Observed and theoretical DNM rates are marked in the left and right y-axis, respectively. Theoretical rate calculated by normalization of the variant rate with the total size of hg38 coding region (59,281,518 bp). *P* values were calculated by a two-sided Wilcoxon rank-sum test. ns: not significant.

1267

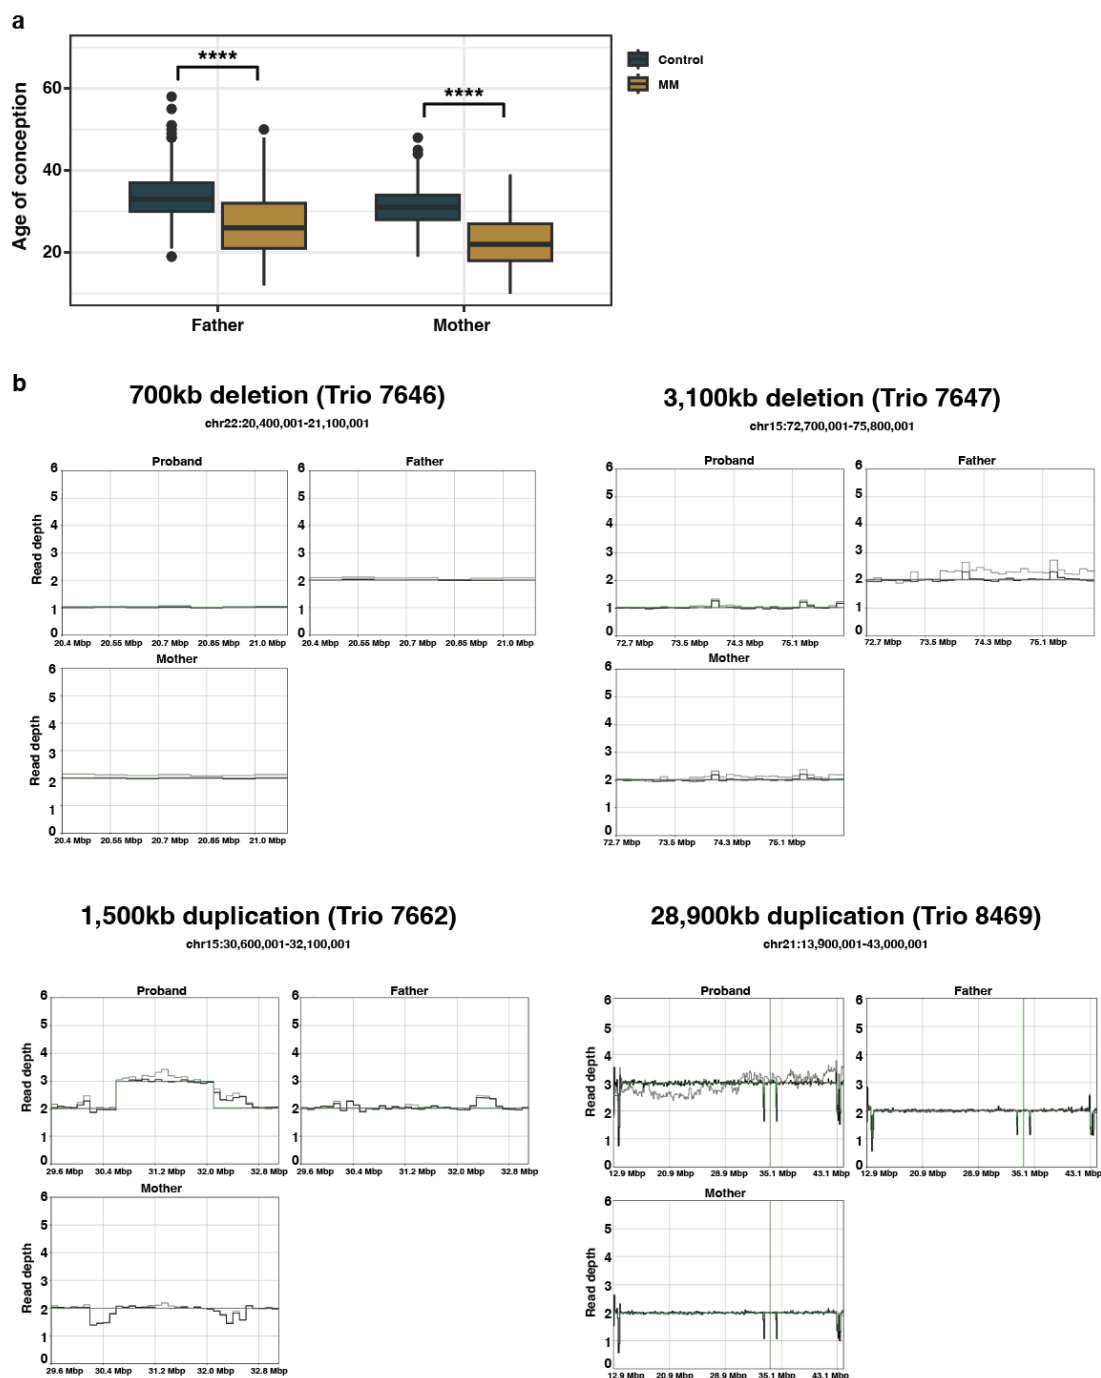

1268

1269

**Extended Data Figure 3. Quantitative and qualitative features of de novo variants.**

1270

**a**, Age of conception of father and mother in MM ( $n = 79$ ) and control ( $n = 683$ ) trios.

1271

The ages of conception were compared with Wilcoxon rank-sum test (two sided). The

1272

age of conceptions were significantly higher in controls than MM, for both of the parents.

1273

$P$  values: \*\*\*\*  $< 0.0001$ .

1274

**b**, De novo large CNVs ( $> 100$ kb) detected from WGS. Read

1275

depths of proband, father, and mother shown. Gray lines: read depths. Green lines: copy

1276

number.

1277

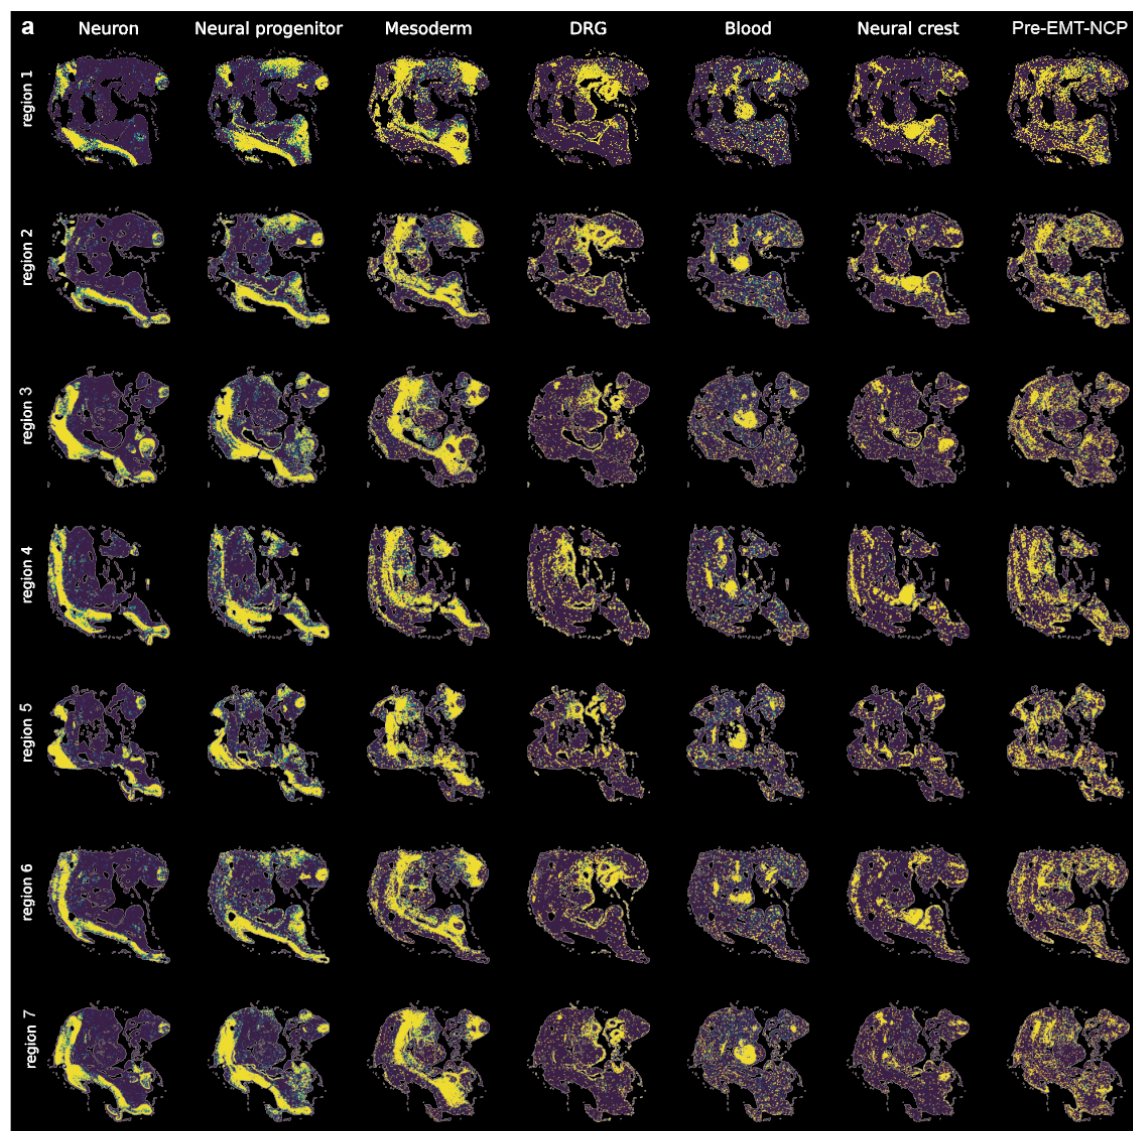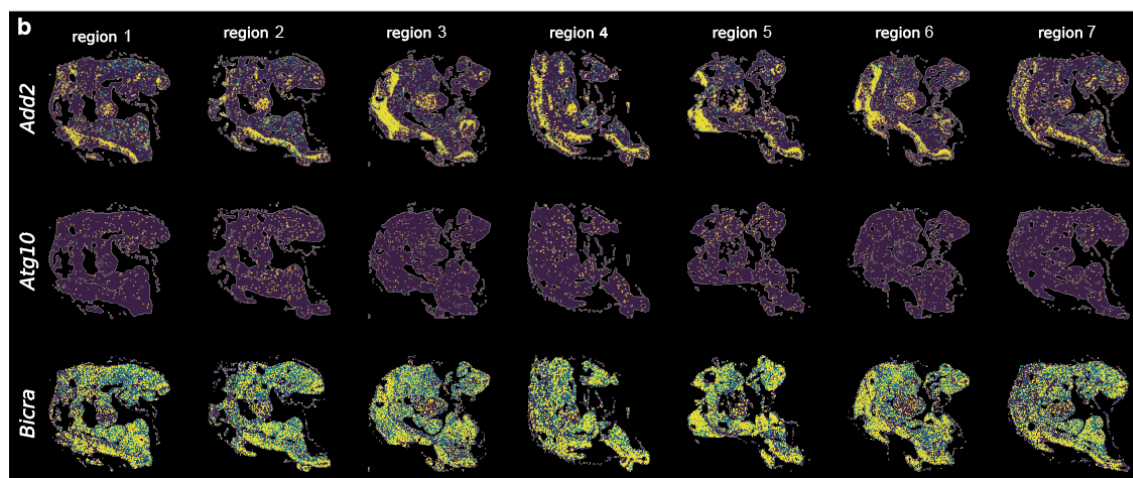

1278  
1279

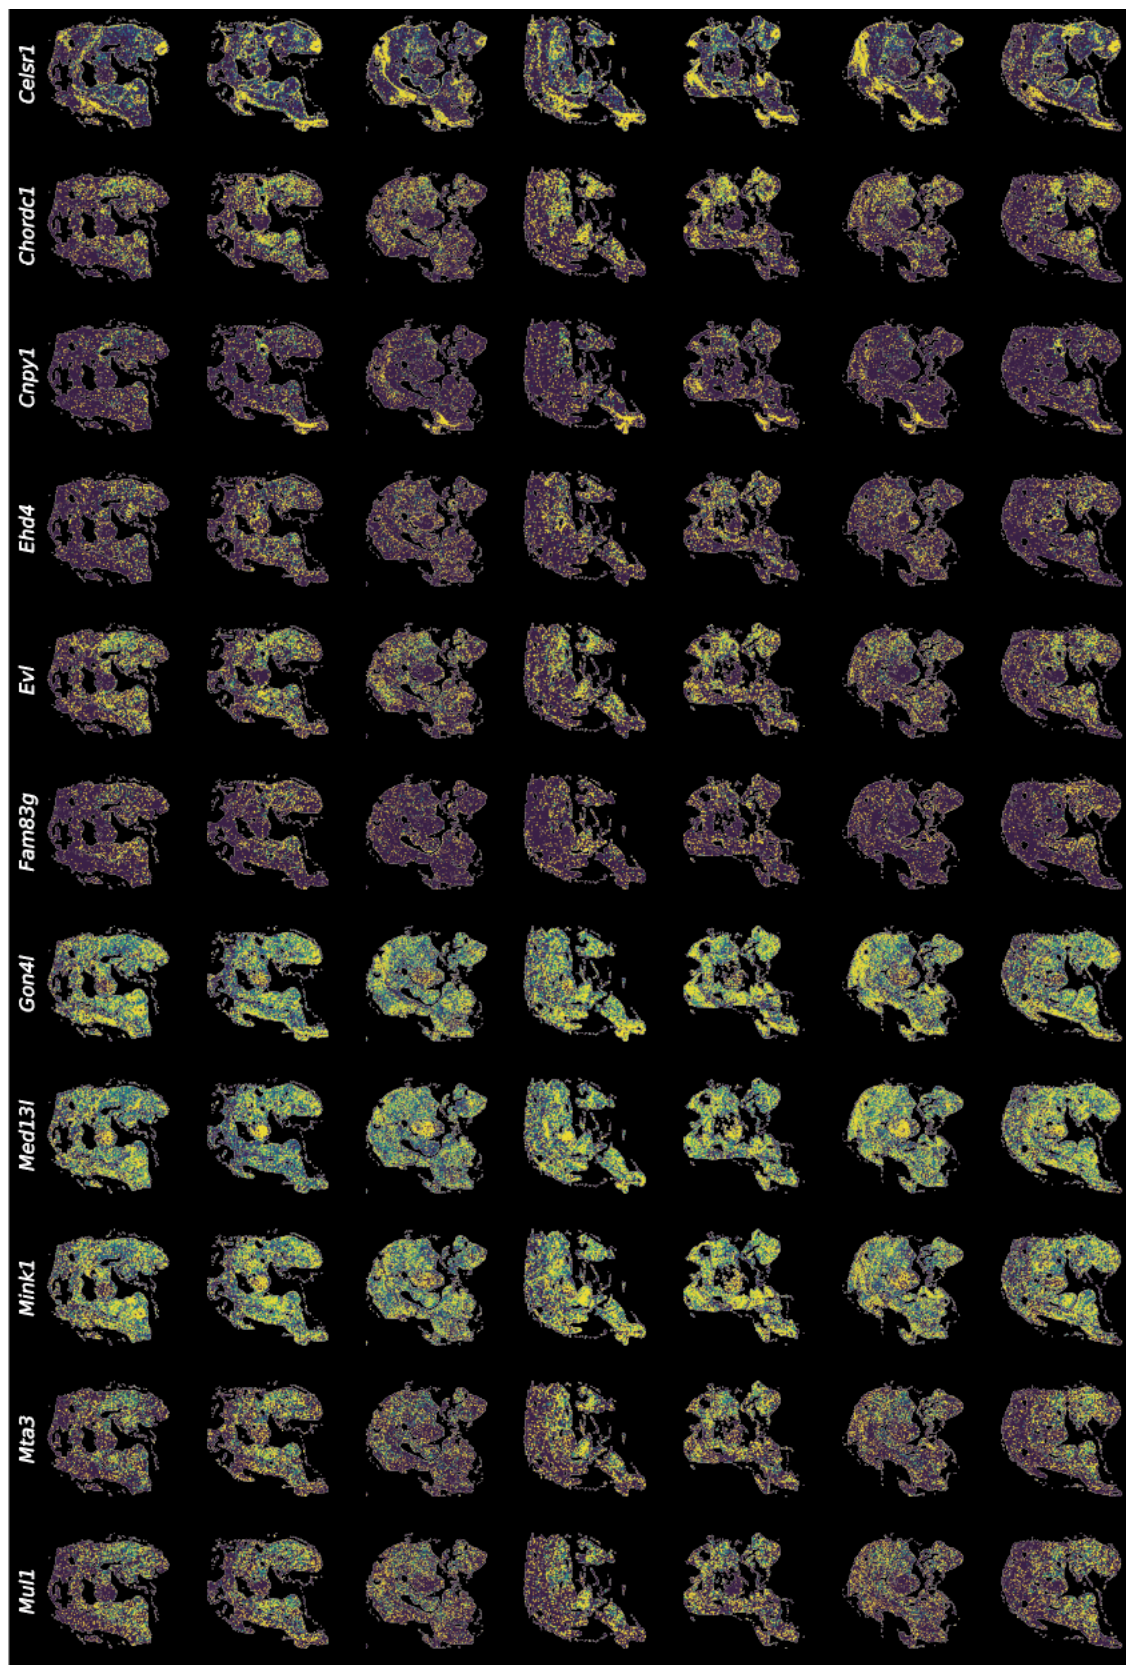

1280

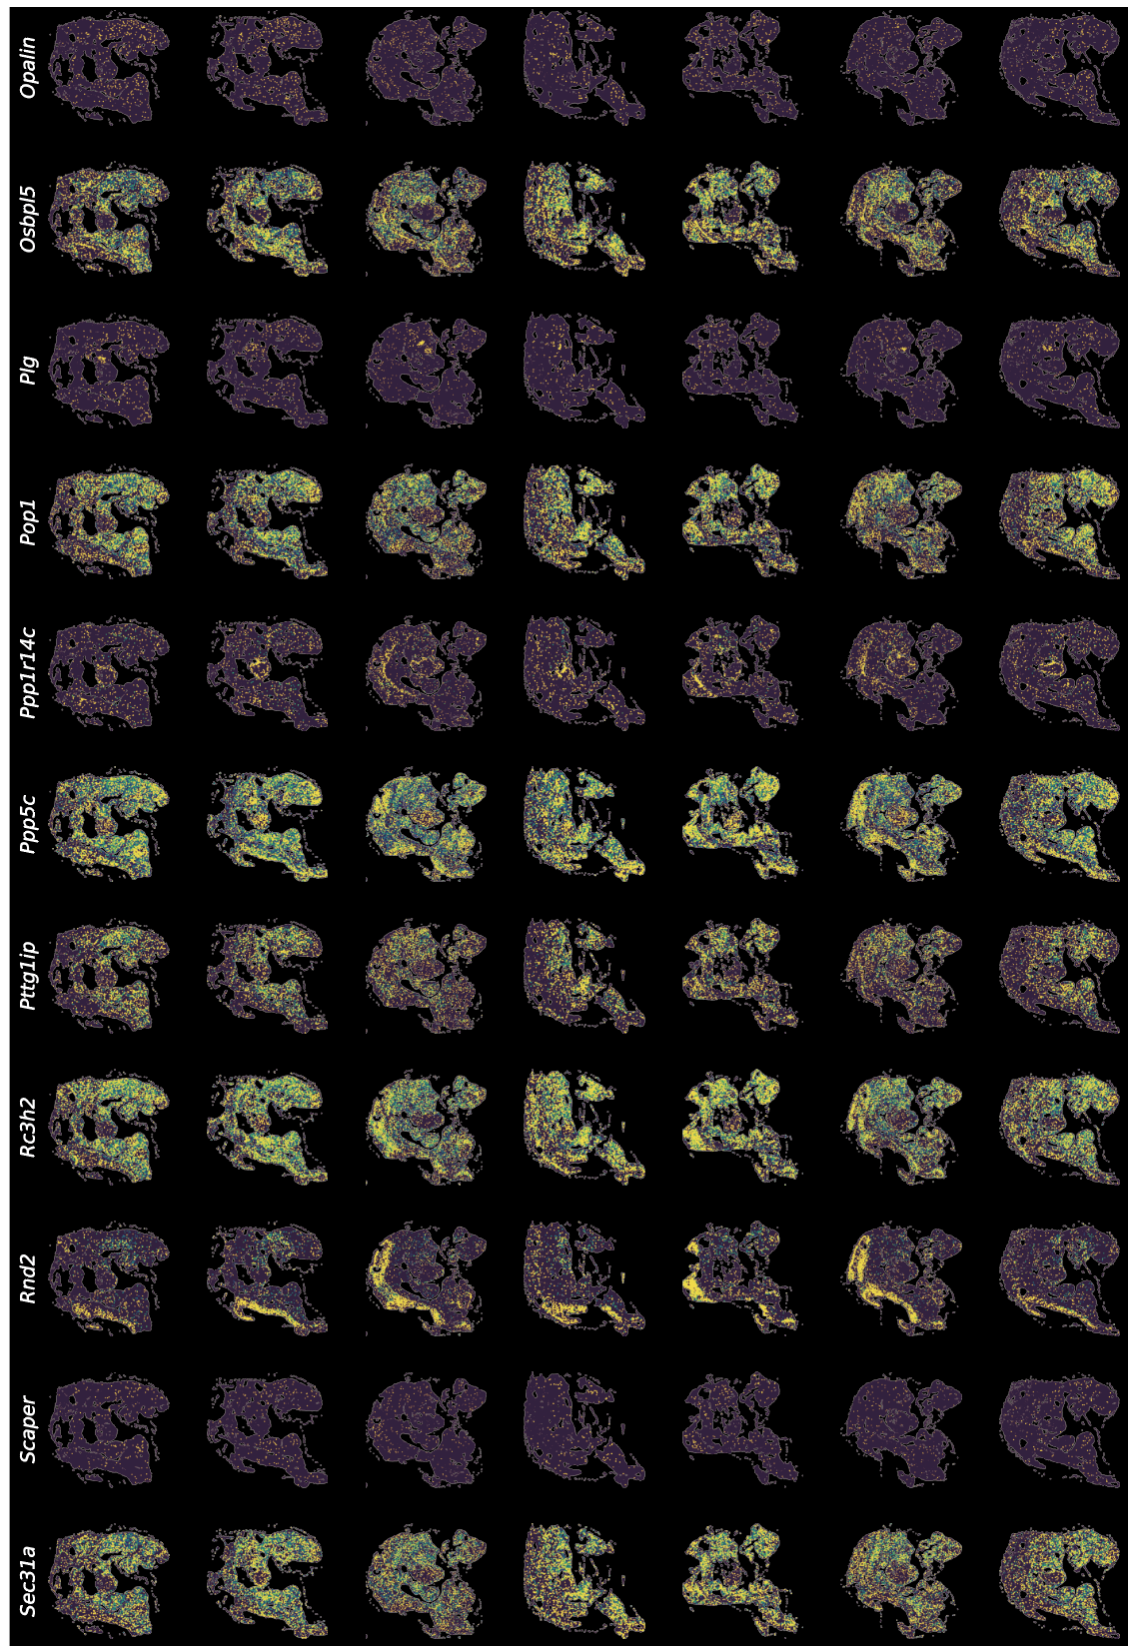

1281

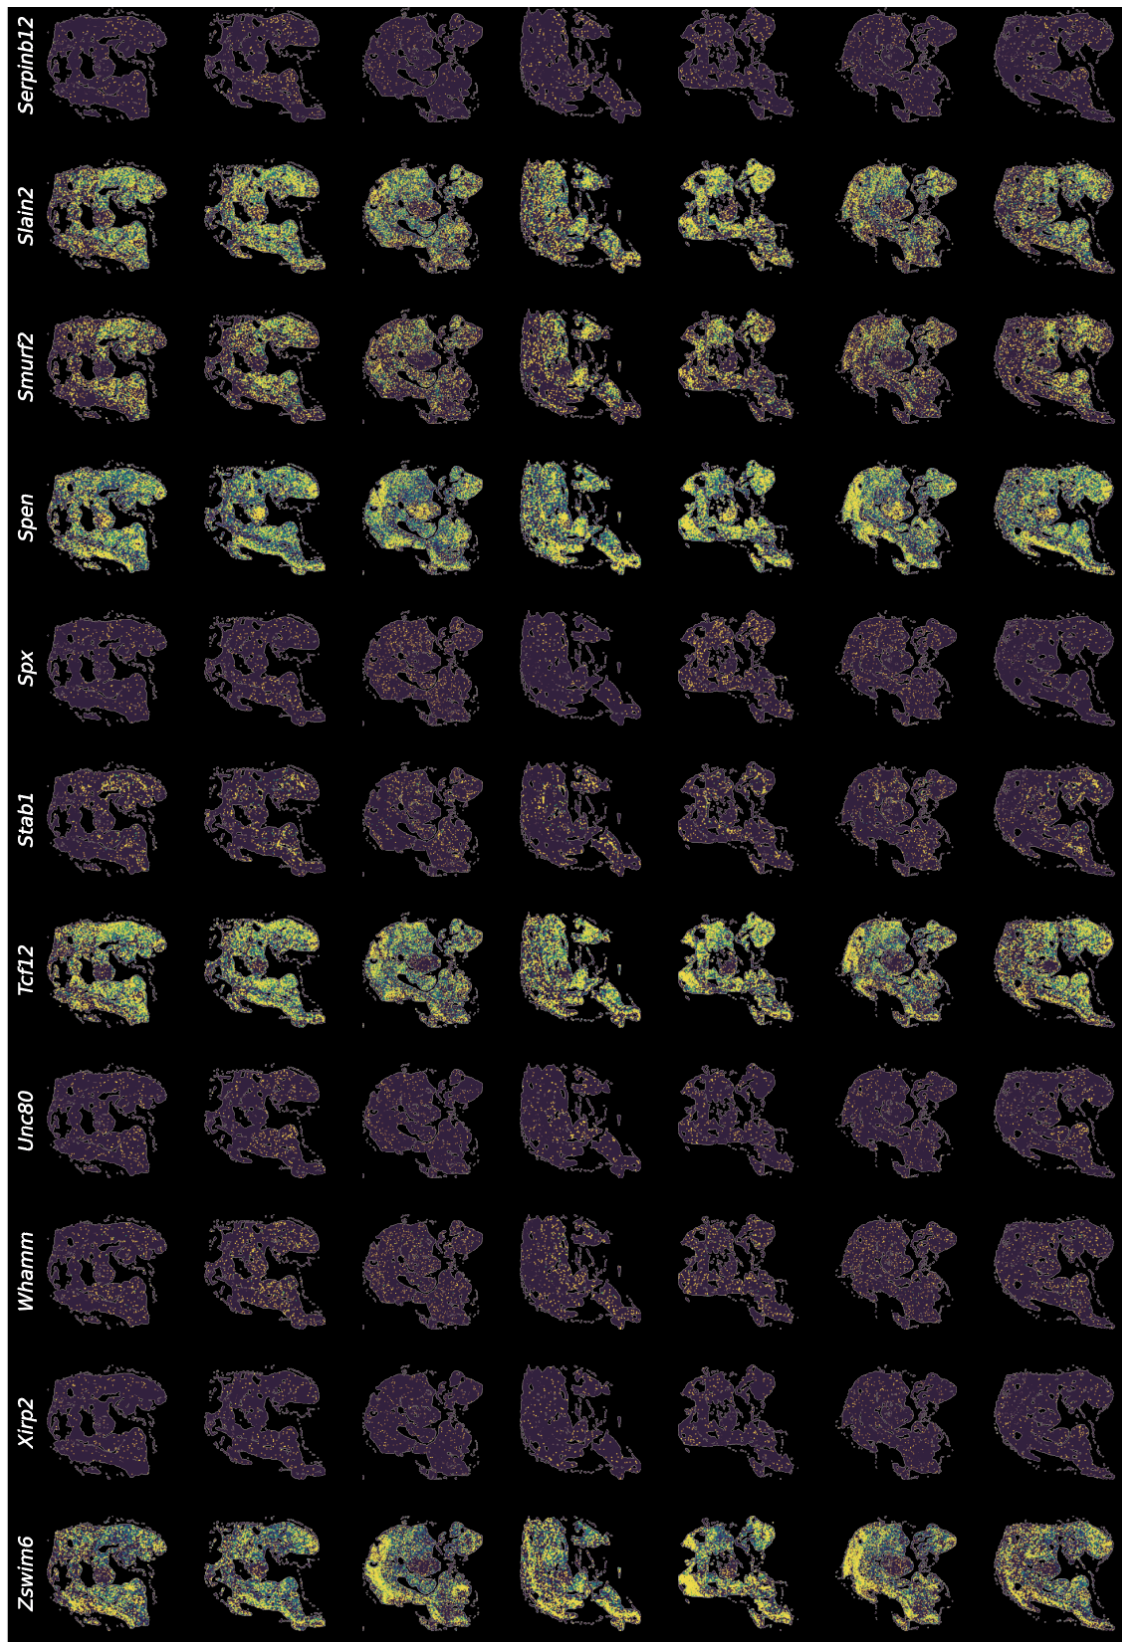

1282

1283 **Extended Data Figure 4. Spatial expression of DNM genes with MERFISH.** Spatial  
1284 expression of the 36 MM genes with damaging DNMs. **a**, Gene expression of marker  
1285 genes for seven selected cell types (neuron, neural progenitor, pre-epithelial to  
1286 mesenchymal transition neural Crest progenitor (NC progenitor), neural crest, mesoderm,  
1287 dorsal root ganglia, and blood), in seven embryonic replicates (regions) 1 (top)-7  
1288 (bottom). **b**, Spatial expression pattern of 36 damaging DNM genes. The seven replicates  
1289 (X axes) of mouse E10.5 showing the gene expression pattern of candidate genes (Y  
1290 axes). R=Rostral, C=Caudal, V=Ventral, D=Dorsal.



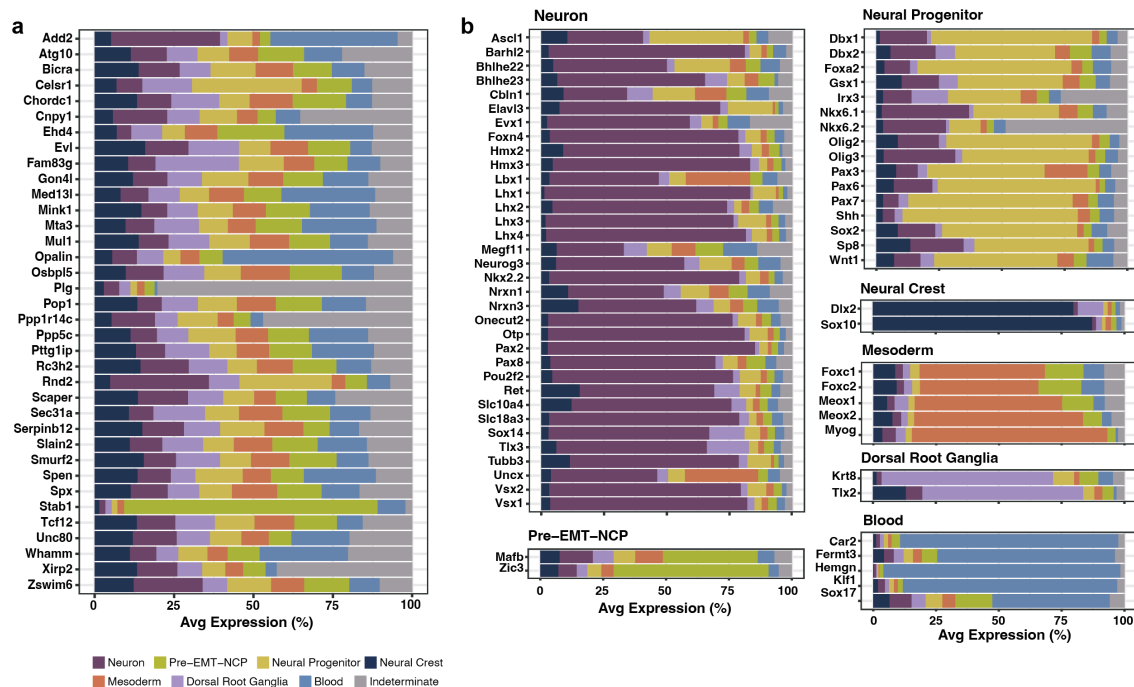

1291

1292 **Extended Data Figure 5. Cell type expression of the DNM genes in MERFISH. a,**  
 1293 Expression of the 36 damaging DNMs in seven cell types: neuron, neural progenitor, pre-  
 1294 epithelial to mesenchymal transition neural crest progenitor (Pre-EMT-NCP), neural  
 1295 crest, mesoderm, dorsal root ganglia, and blood. Indeterminate refers to the cells that  
 1296 were not specified with the marker genes designed for the seven cell types. **b,** Expression  
 1297 of marker genes used for specifying the cell types in MERFISH. Marker genes are shown  
 1298 within the cell type category which they represent.

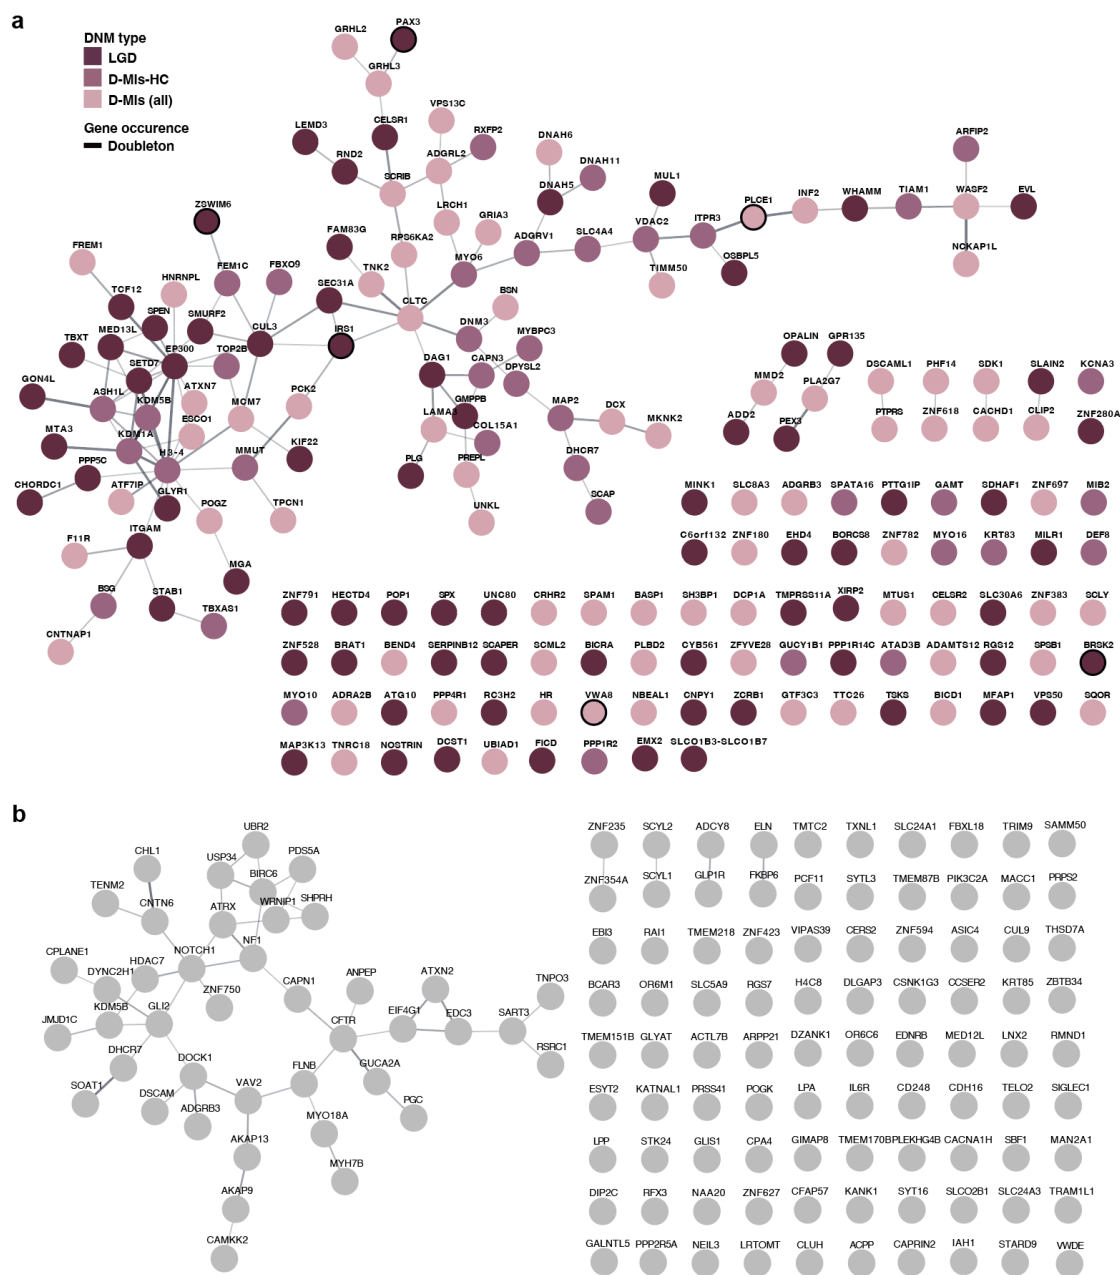

1299  
1300

1301 **Extended Data Figure 6. Connections of genes having damaging DNMs of MM and**  
 1302 **control cohorts. a-b,** Genes with damaging DNMs (LGD + D-Mis) and their  
 1303 interconnections based on the STRING database, are shown for **(a)** MM and **(b)** control  
 1304 cohorts. Node color: variant functional categories: LGD (purple), D-Mis (light pink), and  
 1305 D-Mis-HC (dark pink). Doubleton genes: black borders. Edge thickness: confidence  
 1306 score of the protein interaction.



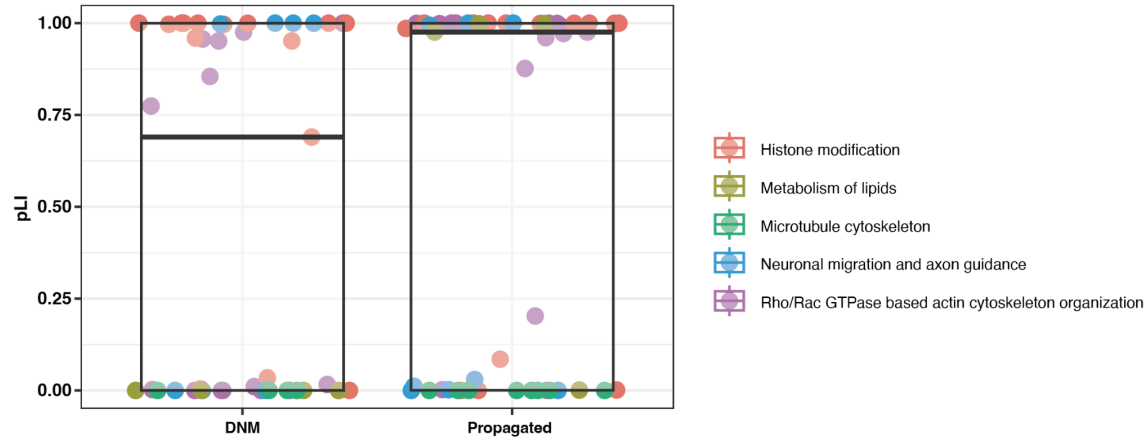

1315

1316

1317 **Extended Data Figure 8. pLI comparison of DNM and propagated genes from the**  
1318 **five submodules.** The probabilities of being loss of function intolerant (pLI) of genes  
1319 from the five functional submodules are shown, derived from 46 damaging DNMs and 51  
propagated genes. Black thick line: median, Box: 1<sup>st</sup> and 3<sup>rd</sup> quantiles.

1320

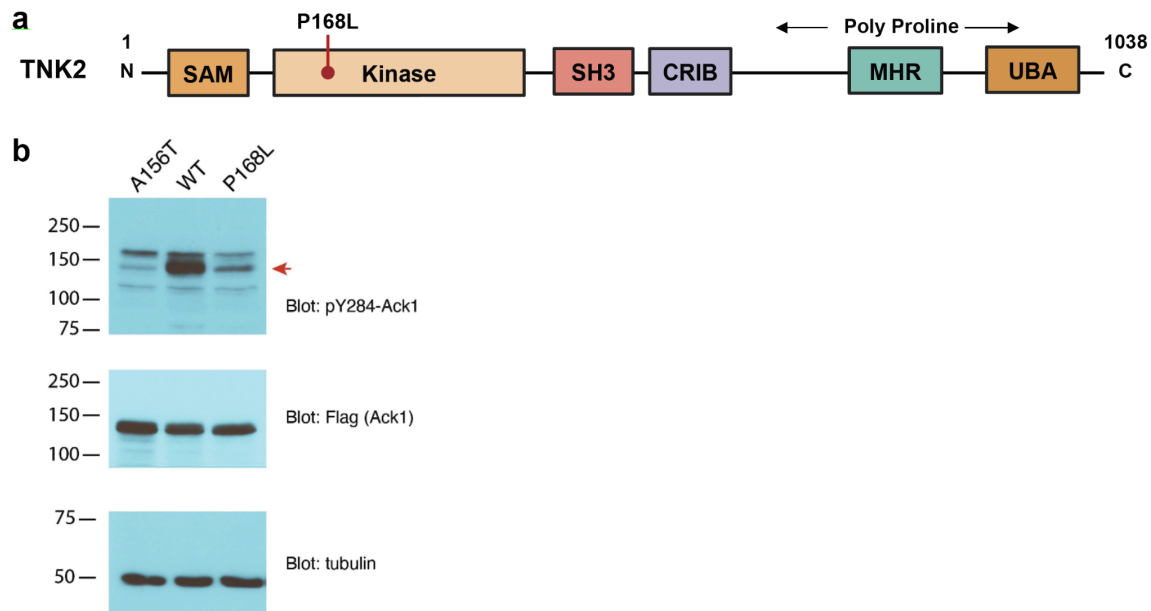

1321

1322

1323

1324

1325

1326

1327

**Extended Data Figure 9. The P168L patient mutation impairs TNK2 activity. a,** P168L mutation is located within the kinase domain. TNK2 contains sterile alpha motif (SAM), Src homology 3 (SH3), CDS42, and RAC-interactive binding (CRIB), Mig6 homology region (MHR), and ubiquitin-associated domain (UBA). **b,** Blots for the A156T kinase dead, wild-type, and the patient mutation P168L. Lysates were probed with pY284-Ack1 (top), Ack1-flag (middle), and gamma-tubulin (bottom).

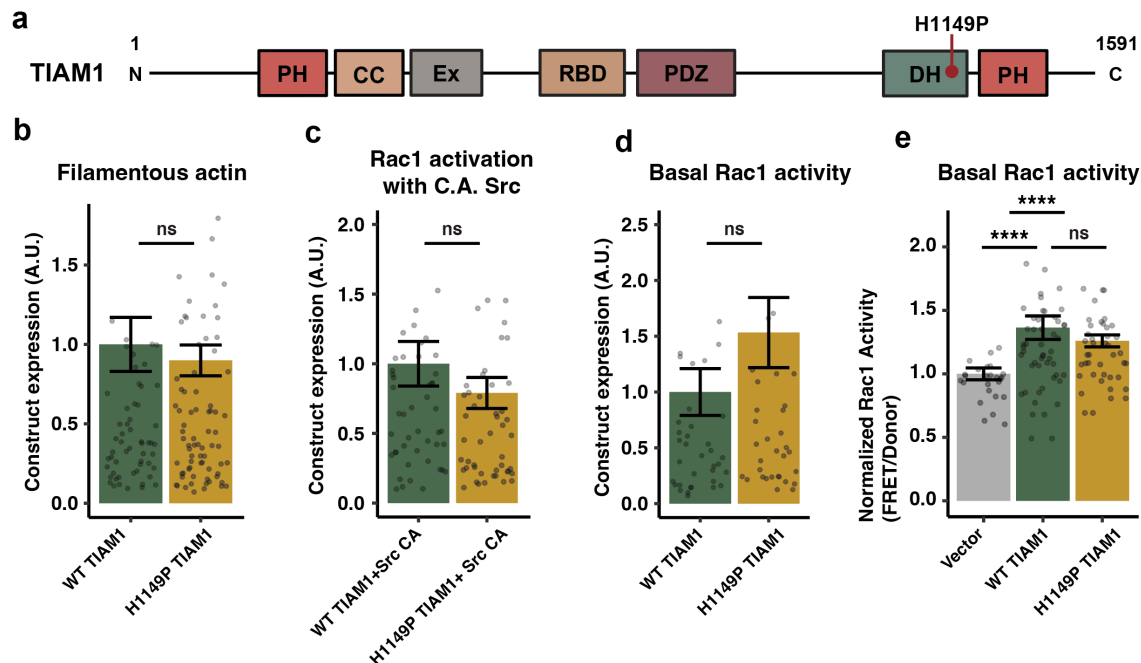

1328  
1329  
1330  
1331  
1332  
1333  
1334  
1335  
1336  
1337  
1338  
1339

**Extended Data Figure 10. The H1149P patient mutation impairs TIAM1 activity.** **a**, H1149P mutation is located within the Dbl homology (DH) domain responsible for GEF activity. TIAM1 contains an N-terminal pleckstrin homology (PH), coiled-coiled (CC), extension (Ex), RAS binding (RBD), PDZ, Dbl-homology (DH) and PH domains, with the patient mutation falling within the DH domain. **b**, Construct expression H1149P is equivalent to wildtype in Phalloidin quantification. **c-d**, Construct expression H1149P in (c) basal and (d) constitutive active (C.A.) Src Rac1 Förster resonance energy transfer (FRET) is equivalent to wildtype. **e**, Protein expression H1149P in C.A. Src Rac1 FRET is equivalent to wildtype. Bar: mean, Errorbar: standard deviation of mean (SEM). Kruskal-Wallis followed by a pairwise Wilcoxon test, *P* value adjusted with Bonferroni. Data shown with Hampel filter.

1340

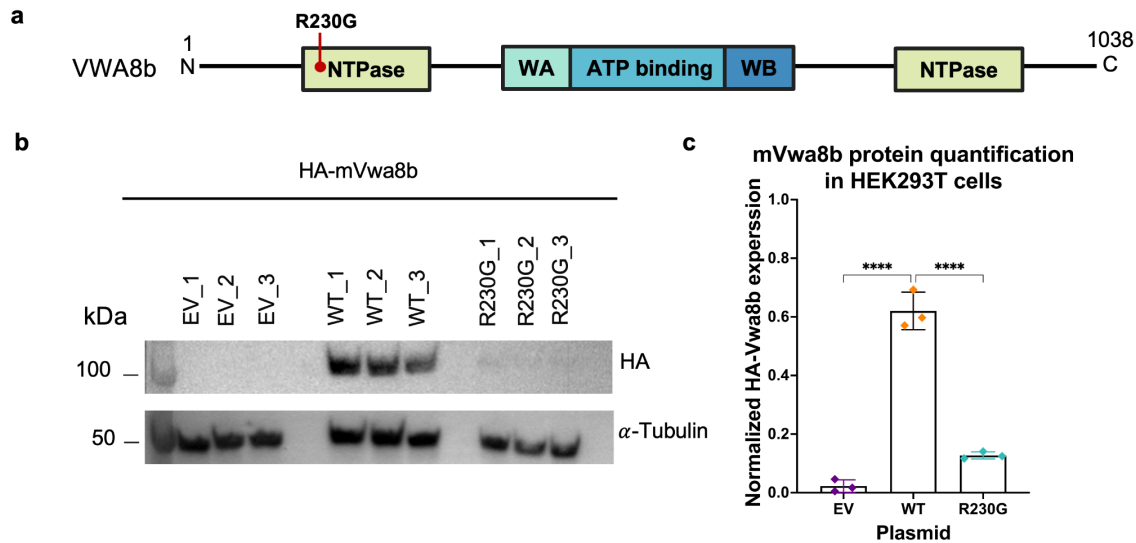

1341

1342

1343

1344 **Extended Data Figure 11. *VWA8b* patient mutation R230G significantly reduces**  
1345 **protein expression levels.** **a**, Schematic of protein domains for VWA8b consisting of  
1346 NTPase, Walker A (WA), ATP binding, and Walker B (WB) domain and patient  
1347 mutation R230G in the NTPase domain. **b**, Western blot for HA-tagged mVwa8b empty  
1348 vector (EV), wildtype and p.R230G protein overexpressed in HEK293T cells and stained  
1349 for HA and alpha tubulin as loading control. **c**, Quantification of HA band intensity from  
1350 panel **b** normalized to loading control. Bar: mean, Errorbar: standard deviation of mean  
1351 (SEM). one-way ANOVA \*\*\*\*:  $P$  value < 0.0001.

1351

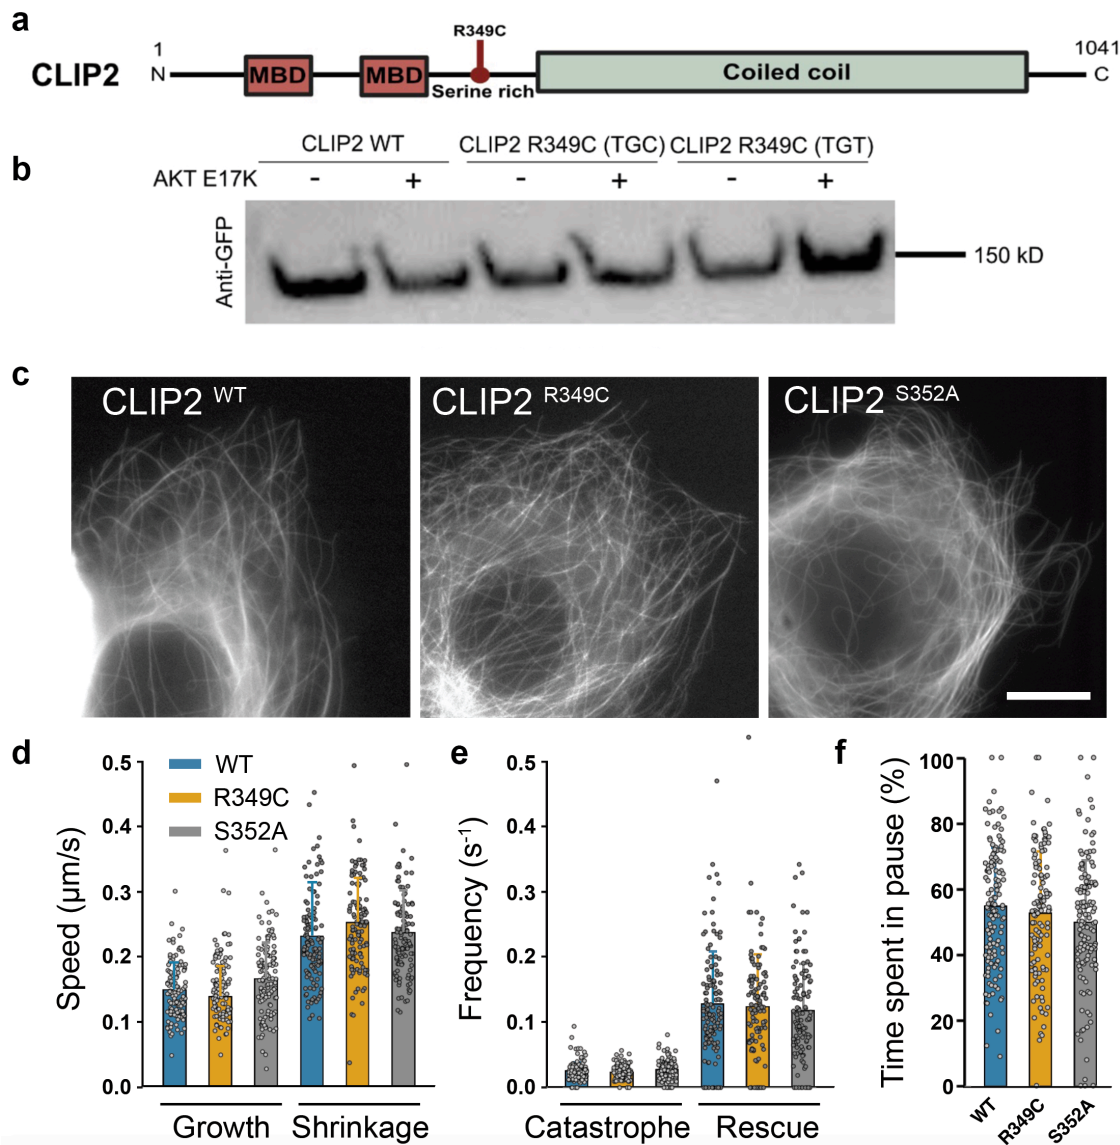

1352  
1353  
1354  
1355  
1356  
1357  
1358  
1359  
1360  
1361  
1362  
1363  
1364  
1365  
1366  
1367

**Extended Data Figure 12. The R349C patient mutation in *CLIP2* has no observable effect on microtubule dynamics.** **a**, Domains in CLIP2 protein, microtubule associated domain (MBD), serine rich region containing the R349C patient mutation, and coiled coil domain. **b**, GFP fused CLIP2 expression in HEK293T cells for wildtype (WT) and two synonymous codons (TGC and TGT both encoding for CYS) for R349C patient mutation. No notable difference in the level of expression was detected between the WT and the mutants. Experiments included co-transfection with constitutively active AKT E17K, a presumed upstream kinase of nearby S352. **c-f**, While at a low expression level in HuH7 cells, fluorescent CLIP2 is restricted to growing microtubule plus ends as expected (not shown), **(c)** its mild overexpression highlights the whole microtubule bodies without difference between WT, R349C (TGC) and a putative phosphorylation site, S352A (Scale bar 10 $\mu$ m). This condition allowed the measurement of a complete panel of microtubule dynamic instability parameters: **(d)** growth and shrinkage speed, **(e)** catastrophe and rescue (R) frequencies **(f)** the time spent in pause. There was no statistical difference between CLIP2 WT and the mutants. The values were measured



1368 from at least 125 microtubules (25 cells) per condition. n = 3 independent experiments.  
1369 Bar: mean, Point: data for each microtubule, Errorbar: standard deviation.  
1370  
1371

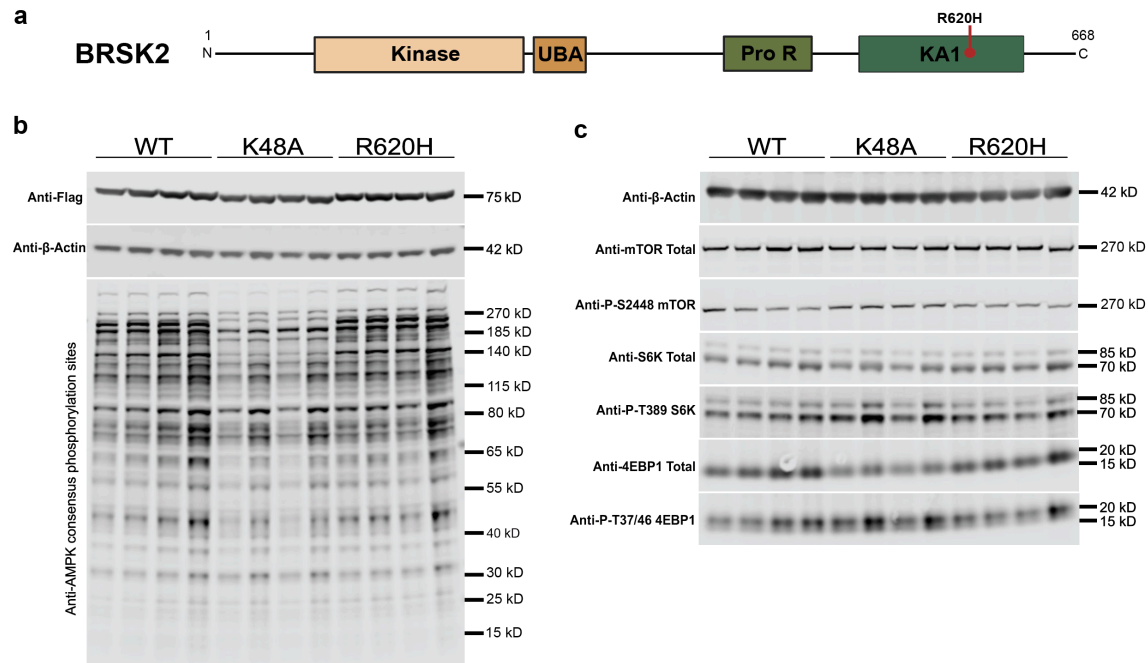

1372  
1373  
1374 **Extended Data Figure 13. *BRSK2* patient mutation R620H shows no notable defects**  
1375 **in kinase activity across known downstream phosphorylation targets. a,** R620H  
1376 mutation is located within the kinase associated 1 domain (KA1). *BRSK2* also contains a  
1377 kinase domain, Ubiquitin-associated (UBA), Proline rich region (Pro R). **b,** Western blot  
1378 showing phosphorylation of AMPK substrate motifs observed across wildtype (WT),  
1379 kinase dead mutant control (K48A) and patient mutation (R620H) Flag-tagged *BRSK2*  
1380 when expressed in HEK293T cells. K48A has an average reduced intensity that is not  
1381 observed in R620H. **c,** Western Blots of total and phosphorylated mTOR, S6K and  
1382 4EBP1 substrates showing no notable differences in phosphorylation for patient mutation  
1383 R620H.

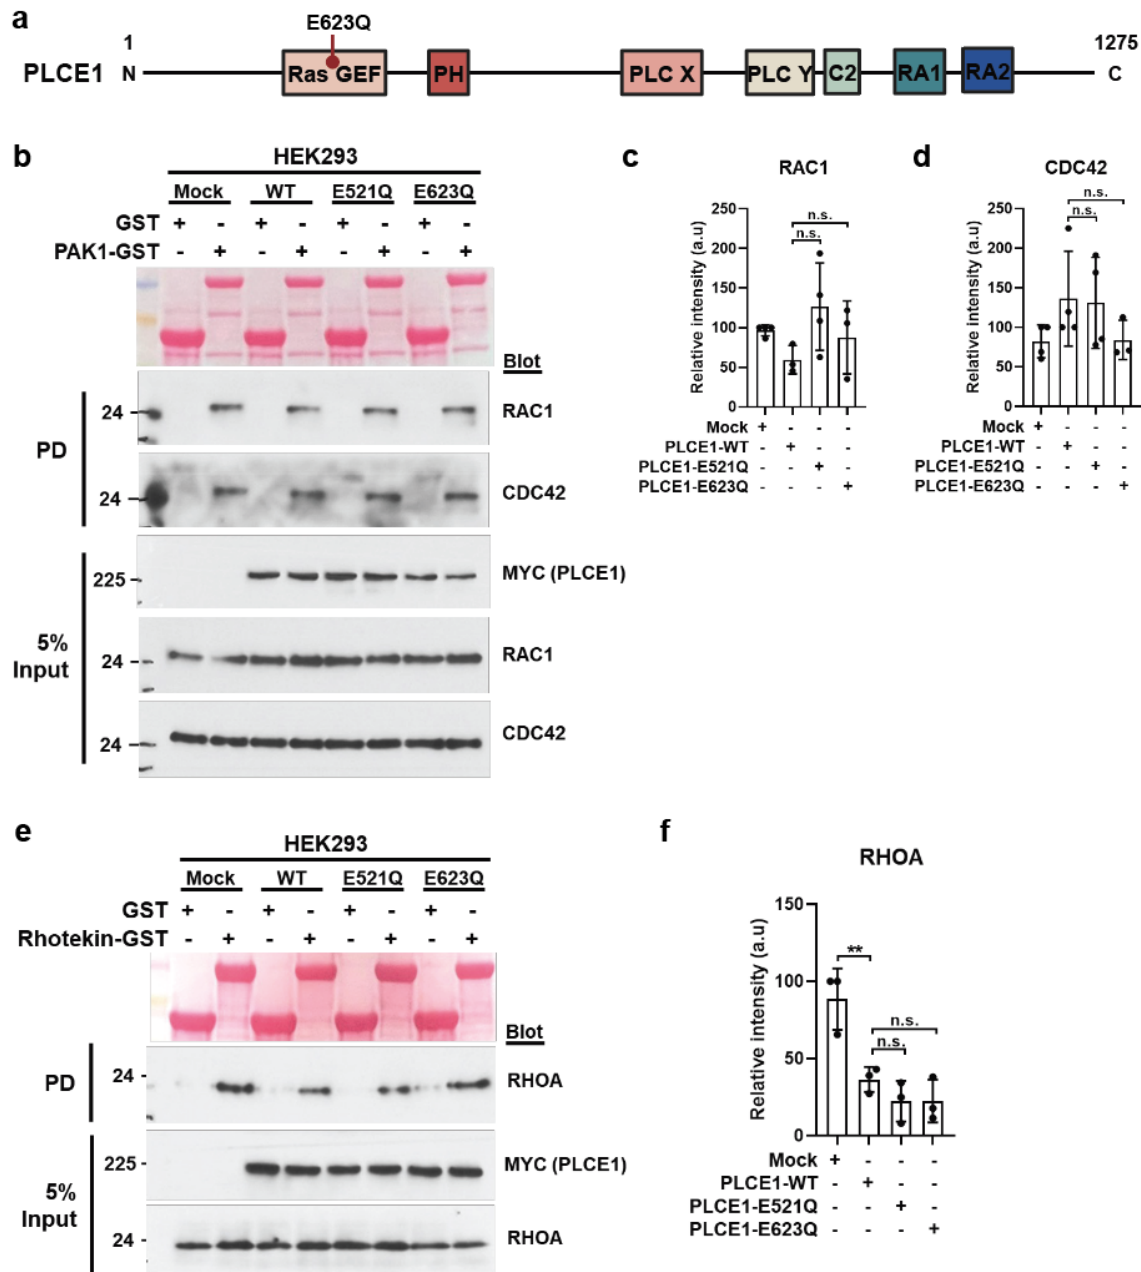

1384

1385

1386

1387

1388

1389

1390

1391

1392

1393

1394

1395

**Extended Data Figure 14. *PLCE1* patient mutation E623Q does not lead to**

**diminished Rho GTPase activity.** **a**, Schematic of *PLCE1* protein with domains

annotated. Patient E623Q mutation is located in the Ras GEF domain. *PLCE1* contains a

Guanine nucleotide exchange factor for Ras-like small GTPases (RAS GEF), Pleckstrin

Homology (PH), Phospholipase C catalytic domain X (PLCX), Phospholipase C catalytic

domain Y (PLCY), Protein Kinase C conserved region 2 (C2), RAS association domain 1

(RA1), and RAS association domain 2 (RA2). **b**, Active GTP-bound forms of RAC1 and

CDC42 precipitated from HEK293 expressing Myc-tagged *PLCE1* using a GST-PAK1

pull-down assay (n=4). Five percent input represents the controls for equal loading.

Compared to mock cells, overexpression of wild-type (WT) and variant forms of *PLCE1*

1396 exhibited no significant difference in RAC1 and CDC42 activity. **c-d**, Quantifications of  
1397 (c) RAC1 and (b) CDC42. **e**, Active GTP-bound form of RHOA precipitated from  
1398 HEK293 expressing Myc-tagged PLCE1 using a GST-rhotekin pulldown assay.  
1399 Overexpression of WT PLCE1 resulted in a substantial decrease in relative RHOA  
1400 activity compared with mock cells. Compared to WT, cells transfected with variant forms  
1401 of PLCE1 exhibited no significant differences in GTP-bound RHOA. **f**, Quantification of  
1402 RHOA (n=4). Data were analyzed by one-way ANOVA with post hoc Bonferroni  
1403 correction. Error bars: standard deviation for greater than 3 independent experiments. PD;  
1404 pulldown, \*\* P < 0.01, n.s. not significant.

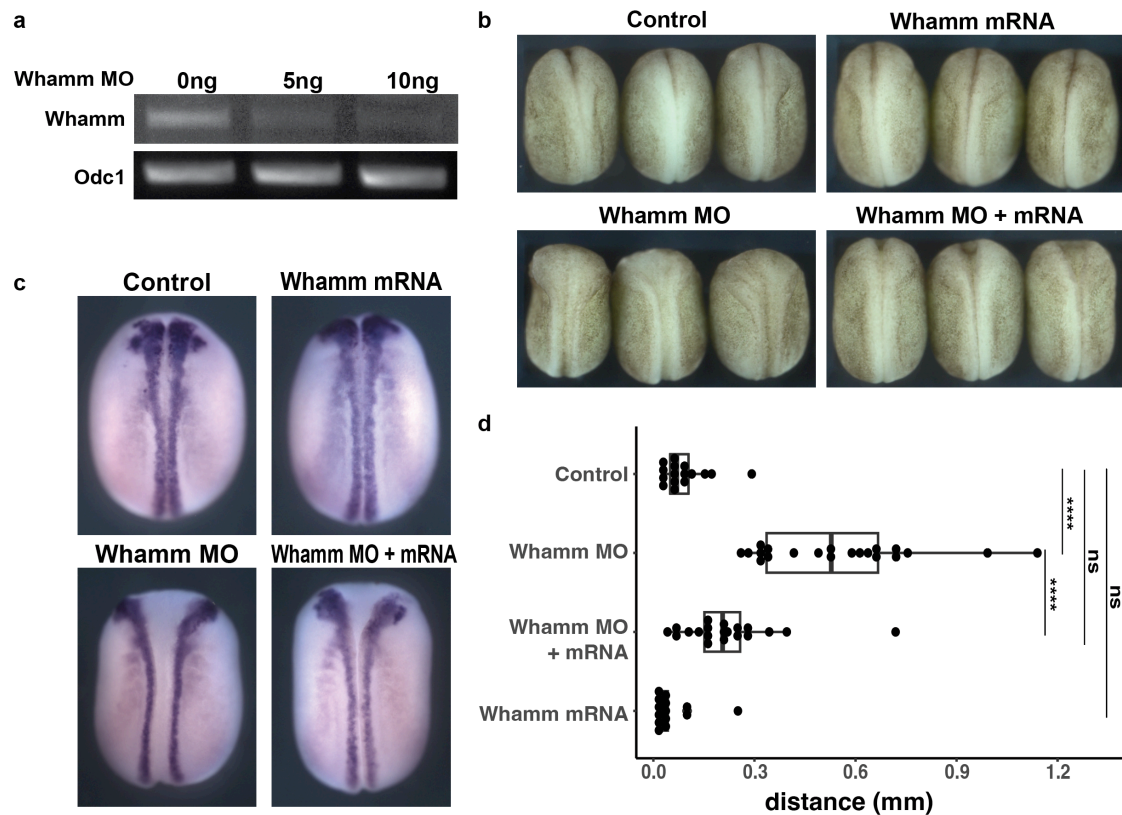

1405  
1406  
1407  
1408  
1409  
1410  
1411  
1412  
1413  
1414  
1415  
1416

**Extended Data Fig. 15. Validation of Whamm morpholino antisense oligonucleotide (MO).** **a**, RT-PCR validates the effective disruption of splicing following injection of Whamm MO. **b-d**, The neural tube closure defect phenotype induced by Whamm MO (10 ng) was rescued through the injection of Whamm mRNA (700 pg). Embryos injected only with mRNA showed no significant phenotype. **b**, Dorsal views of *Xenopus* embryos at Stage 19 **c**, Embryos subjected to in situ hybridization against Pax3 to visualize the neural folds **d**, Graph depicting the quantitative analysis of the distance between neural folds. P-values by one-way ANOVA with post-hoc honestly significant difference (HSD) test. \*\*\*\*: *P* value < 0.0001, ns: not significant.

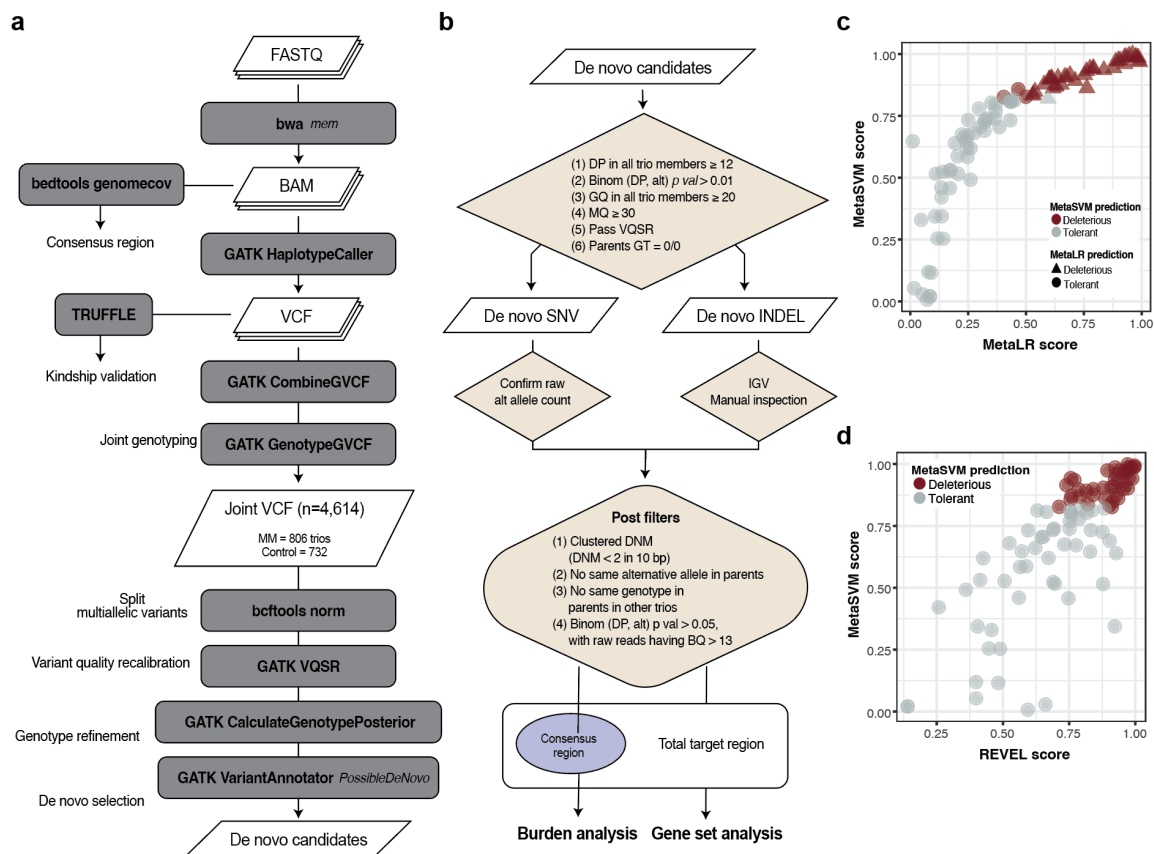

1417  
1418  
1419  
1420  
1421  
1422  
1423  
1424  
1425  
1426  
1427  
1428  
1429  
1430  
1431

**Extended Data Figure 16. Pipeline of detecting high-confidence de novo mutation (DNM) and annotation of D-Mis-HC.** **a**, Schematic overview of DNM detection. The raw coverages of aligned bam files were utilized in consensus region generation (see Methods). Germline variants were utilized to test the integrity of the trios with TRUFFLE. GATK genotype refinement workflow was utilized for the DNM detection **b**, The candidate de novo SNVs and Indels were applied with a series of qualitative and quantitative filters. DP: depth, Binom: binomial test, alt: count of reads with alternative alleles, GQ: genotype quality, MQ: mapping quality, VQSR: variant quality score recalibration, GT: genotype. **c-d**, Pathogenicity prediction of D-Mis-HC variants with MetaLR and REVEL. The pathogenicity of 116 D-Mis DNMs predicted by MetaSVM are shown with the prediction results from MetaLR and REVEL. **(c)** MetaLR deleterious (score > 0.5) is shown in triangle and **(d)** mutations with REVEL score higher than 0.75 are predicted as deleterious (right).

1432 **Extended Data Table**

| <b>Mutation type</b> | <b>Category</b>           | <b>Coding</b> | <b>Noncoding</b> | <b>Total</b> |
|----------------------|---------------------------|---------------|------------------|--------------|
| SNV + Indel          | DNM count                 | 1,976         | 8,817            | 10793        |
|                      | DNM count per proband     | 20.16         | 89.97            | 110.13       |
|                      | rate ( $\times 10^{-8}$ ) | 0.315         | 1.4              | 1.72         |
| SNV                  | DNM count                 | 1,658         | 7,429            | 9,087        |
|                      | DNM count per proband     | 16.92         | 75.81            | 92.72        |
|                      | rate ( $\times 10^{-8}$ ) | 0.26          | 1.18             | 1.45         |
| Indel                | DNM count                 | 318           | 1,388            | 1,706        |
|                      | DNM count per proband     | 3.24          | 14.16            | 17.41        |
|                      | rate ( $\times 10^{-8}$ ) | 0.05          | 0.22             | 0.27         |

1433 **Extended Data Table 1. De novo SNV and Indel rates ( $\times 10^{-8}$ ) of WGS in coding and**  
1434 **noncoding regions.** Rates were calculated with 99 trios could be analyzed after removal  
1435 of four kinship failed trios.  
1436

| <b>Family</b> | <b>Chromosome</b> | <b>Start position</b> | <b>End position</b> | <b>Length</b> | <b>Variant type</b> | <b>Cytoband</b> |
|---------------|-------------------|-----------------------|---------------------|---------------|---------------------|-----------------|
| 7646          | chr22             | 20,400,001            | 21,100,001          | -700,000      | Deletion            | q11.21          |
| 7647          | chr15             | 72,700,001            | 75,800,001          | -3,100,000    | Deletion            | q24.2-q24.1     |
| 7662          | chr15             | 30,600,001            | 32,100,001          | 1,500,000     | Duplication         | q13.3-q13.2     |
| 8469          | chr21             | 13,900,001            | 43,000,001          | 28,900,000    | Duplication         | q22.11-q22.12   |

1437 **Extended Data Table 2. de novo large CNV (>100kb) in WGS, analyzed with 99**  
1438 **trios.**

1439

| Term                                                       | Ontology Source       | ID           | P Value (Bonferroni step-down adjusted) | % Associated Genes | Nr. Genes | Associated Genes                                                  |
|------------------------------------------------------------|-----------------------|--------------|-----------------------------------------|--------------------|-----------|-------------------------------------------------------------------|
| <b>Morphogenesis of a polarized epithelium</b>             | GO Biological Process | GO:0001738   | 0.00001                                 | 8.41               | 9.00      | BRSK2, CELSR1, CELSR2, GRHL3, LAMA3, SCRIB, SH3BP1, SMURF2, TIAM1 |
| <b>Signaling by NTRKs</b>                                  | Reactome              | R-HSA:166520 | 0.00031                                 | 5.97               | 8.00      | CLTC, DNM3, EP300, IRS1, PTPRS, RPS6KA2, TCF12, TIAM1             |
| <b>Establishment of planar polarity</b>                    | GO Biological Process | GO:0001736   | 0.00070                                 | 7.41               | 6.00      | BRSK2, CELSR1, CELSR2, GRHL3, SMURF2, TIAM1                       |
| <b>Wnt signaling pathway, planar cell polarity pathway</b> | GO Biological Process | GO:0060071   | 0.00100                                 | 8.62               | 5.00      | CELSR1, CELSR2, GRHL3, SMURF2, TIAM1                              |
| <b>L1CAM interactions</b>                                  | Reactome              | R-HSA:373760 | 0.00220                                 | 5.04               | 6.00      | CLTC, CNTNAP1, DCX, DNM3, DPYSL2, RPS6KA2                         |
| <b>Signaling by NTRK1 (TRKA)</b>                           | Reactome              | R-HSA:187037 | 0.00276                                 | 5.22               | 6.00      | CLTC, DNM3, EP300, IRS1, RPS6KA2, TCF12                           |
| <b>Neural tube closure</b>                                 | GO Biological Process | GO:0001843   | 0.00323                                 | 4.90               | 5.00      | CELSR1, GRHL2, GRHL3, SCRIB, TBXT                                 |

1440 **Extended Data Table 3. Pathway enrichment of the damaging DNMs in MM.** 187  
 1441 damaging DNMs (LGD + D-Mis) were tested for enrichment in known functional  
 1442 biological pathways in Gene ontology (GO) Biological Process, Reactome, and KEGG  
 1443 pathways. Pathways that were significant with Bonferroni step-down adjusted  $P$  value <  
 1444 0.05 are shown.



## 1445 Supplementary Table

| Family ID | Gene                   | Mutation                                                   | OMIM associated phenotype                                                      | Mutations reported with OMIM phenotype                            | Patient phenotype                                                                |
|-----------|------------------------|------------------------------------------------------------|--------------------------------------------------------------------------------|-------------------------------------------------------------------|----------------------------------------------------------------------------------|
| 5875      | <i>KIF22</i>           | chr16:29798687C>T; c.484C>T; p.Arg162Ter                   | Spondyloepimetaphyseal dysplasia s. with joint laxity, type 2                  | Heterozygous missense in exon 4                                   | Excluded Spondyloepimetaphyseal dysplasia features                               |
| 6032      | <i>CELSR1</i>          | chr22:46397819G>GTTGGT; c.5551_5555dup; p.Asn1852LysfsTer7 | Lymphatic malformation 9 s.                                                    | Heterozygous nonsense or frameshift show incomplete penetrance    | Excluded lymphatic malformation features                                         |
| 6147      | <i>SLCO1B3-SLCO1B7</i> | chr12:21067374C>T, c.1803C>T; p.Arg580X                    | Digenic recessive hyperbilirubinemia, Rotor type s.                            | Read through transcript                                           | Excluded hyperbilirubinemia features                                             |
| 6293      | <i>TOP2B</i>           | chr3:25636033A>G, c.c.740T>C; p.Leu247Pro                  | B-cell immunodeficiency, distal limb anomalies, and urogenital malformation s. | Heterozygous deletion and missense mutations in the TOPRIM domain | Excluded immunodeficiency, limb and urogenital defect features                   |
| 6307      | <i>ADGRB3</i>          | chr6:68975294G>A, c.1688G>A; p.Ser563Asn                   | Cerebellar ataxia                                                              | Biallelic loss                                                    | Excluded cerebellar ataxia features                                              |
| 6313      | <i>BICRA</i>           | chr19:47680692C>T, c.1522C>T; p.Gln508*                    | Coffin-Siris.-12 s.                                                            | Haploinsufficiency                                                | Meets criteria for Coffin-Siris s.                                               |
| 6319      | <i>CLIP2</i>           | chr7:74357307C>T, c.1045C>T; p.Arg349Cys                   | Williams-Beuren s.                                                             | Contiguous gene deletion s. at 7q11.23                            | Excluded Williams-Beuren s. features                                             |
| 6328      | <i>SLC4A4</i>          | chr4:71472901C>A, c.1702C>A; Pro568Thr                     | Proximal renal tubular acidosis with ocular abnormalities s.                   | Biallelic substitutions lead to decrease NBC activity             | Excluded renal tubular acidosis or ocular features. Displays growth retardation. |
| 6337      | <i>TCF12</i>           | chr15:57262209G>T, c.412+1G>T; splice loss                 | Craniosynostosis type 3 s. Hypogonadotropic hypogonadism 26 s.                 | Haploinsufficiency; Biallelic loss of function                    | Displays features of craniosynostosis.                                           |
| 6388      | <i>LOXHD1</i>          | chr18:46509817T>G, c.2067-2A>C splice loss                 | Deafness, autosomal recessive type 77 s.                                       | Biallelic mutations                                               | Excluded features of deafness                                                    |
| 6395      | <i>PLA2G7</i>          | chr6:46709351G>A, c.845C>T; p.Thr282Ile                    | Platelet-activating factor acetylhydrolase deficiency s.                       | Biallelic mutations                                               | Excluded features of platelet-activating factor acetylhydrolase deficiency       |
| 6423      | <i>KDM1A</i>           | chr1:23057487C>T, c.934C>T p.Arg312Cys                     | Cleft palate and distinctive facial features s.                                | Heterozygous loss                                                 | Lacks features of cleft palate                                                   |
| 6570      | <i>TNK2</i>            | chr3:195872454A>T, c.1462T>A, p.Trp488Arg                  | Autosomal recessive infantile epilepsy (pending confirmation)                  | Biallelic loss                                                    | Excluded features of infantile epilepsy                                          |
| 6695      | <i>TIMM50</i>          | chr19:39485743A>G, c.109-2318A>G;                          | 3-methylglutaconic aciduria, type IX s.                                        | Biallelic loss                                                    | Excluded features of 3-methylglutaconic aciduria                                 |

|      |                |                                                                           |                                                                                                     |                                |                                                                            |
|------|----------------|---------------------------------------------------------------------------|-----------------------------------------------------------------------------------------------------|--------------------------------|----------------------------------------------------------------------------|
|      |                | p.Tyr143Cys                                                               |                                                                                                     |                                |                                                                            |
| 6705 | <i>ASPM</i>    | chr1:197102395T<br>GAGA>T,<br>c.6852_6855delT<br>CTC;<br>p.Leu2285Argfs*6 | Microcephaly 5, primary,<br>autosomal recessive s.                                                  | Biallelic loss                 | Excluded features of<br>microcephaly                                       |
| 6708 | <i>SCAPER</i>  | chr15:76705971G<br>>A, c.2179C>T;<br>p.Arg727Ter                          | Intellectual developmental<br>disorder and retinitis<br>pigmentosa s.                               | Biallelic loss                 | Excluded features of<br>intellectual disability or<br>retinitis pigmentosa |
| 6133 | <i>ZSWIM6</i>  | chr5:61541917C><br>T, c.2737C>T;<br>p.Arg913Ter                           | Acromelic frontonasal<br>dysostosis s.                                                              | Haploinsufficiency             | Reduced size of nose,<br>possible dysostosis                               |
| 6289 | <i>UNC80</i>   | chr2:209872917C<br>>T, c.3793C>T;<br>p.Arg1265Ter                         | Hypotonia, infantile, with<br>psychomotor retardation and<br>characteristic facies 2 s.             | Biallelic loss                 | Lacks typical facies, but has<br>features of hypotonia                     |
| 7443 | <i>POP1</i>    | chr8:98130062G><br>T, c.571G>T,<br>p.Glu191Ter                            | Anauxetic dysplasia 2                                                                               | Biallelic loss                 | Lacks features of anauxetic<br>dysplasia                                   |
| 7437 | <i>DNAH5</i>   | chr5:13807727T><br>G, c.7753-2A>C,<br>splice loss                         | Ciliary dyskinesia, primary, 3                                                                      | Biallelic loss                 | Lacks features of ciliary<br>dyskinesia                                    |
| 7440 | <i>ATXN7</i>   | chr3:63990756C><br>T, c.1579C>T;<br>p.Arg527Trp                           | Spinocerebellar ataxia 7                                                                            | CAG repeat expansion           | Lacks features of<br>spinocerebellar ataxia                                |
| 8012 | <i>MED13L</i>  | chr12:115980836<br>G>A, c.5278C>T;<br>p.Arg1760Ter                        | ID and distinctive facial features<br>with or without cardiac defects<br>(MRFACD)                   | Haploinsufficiency             | Cannot exclude features of<br>MRFACD.                                      |
| 8055 | <i>MMUT</i>    | chr6:49444675T><br>C, c.1640A>G;<br>p.Asn547Ser                           | Methylmalonic aciduria, mut(0)<br>type                                                              | Biallelic loss                 | Lacks features of<br>methylmalonic aciduria                                |
| 8012 | <i>NCKAP1L</i> | chr12:54499380C<br>>T, c.128C>T;<br>p.Pro43Leu                            | Immunodeficiency 72 with<br>autoinflammation                                                        | Biallelic loss                 | Lacks features of primary<br>immunodeficiency                              |
| 7859 | <i>VWA8</i>    | chr13:41729591T<br>AG>T,<br>c.2587_2588delC<br>T;<br>p.Leu863Sfs*20       | Retinitis Pigmentosa 97(?)                                                                          | Heterozygous missense          | Lacks features of retinitis<br>pigmentosa                                  |
| 7821 | <i>SPATA16</i> | chr3:173019534C<br>>T, c.800G>A;<br>p.Arg267His                           | Spermatogenic failure 6 (?)                                                                         | Biallelic loss                 | Unable to assess to due<br>female sex                                      |
| 7749 | <i>SDHAF1</i>  | chr19:35995381T<br>C>T, c.108delC;<br>stop lost                           | Mitochondrial complex II<br>deficiency, nuclear type 2                                              | Biallelic loss                 | Lacks features of<br>mitochondrial disease                                 |
| 7809 | <i>MYO6</i>    | chr6:75857131C><br>T, c.1258C>T;<br>p.Arg420Cys                           | Deafness, nonsyndromic                                                                              | Heterozygous missense          | No evidence of deafness                                                    |
| 7899 | <i>MAP2</i>    | chr2:209710227C<br>>A, c.978C>A;<br>Asn326Lys                             | Rett-like s. (preserved speech<br>variant)                                                          | 2q Contiguous gene deletion s. | Lacks Rett s.-like features                                                |
| 7886 | <i>ITPR3</i>   | chr6:33686219C><br>T, c.5834C>T;<br>p.Thr1945Ile                          | Charcot-Marie-Tooth disease,<br>demyelinating, type 1J                                              | Heterozygous missense          | Lacks features of Charcot-<br>Marie-Tooth disease                          |
| 7922 | <i>GMPPB</i>   | chr3:49723293G><br>A, c.220C>T;                                           | Muscular dystrophy-<br>dystroglycanopathy (congenital<br>with brain and eye anomalies),<br>type A14 | Biallelic loss                 | Excluded muscular dystrophy                                                |

|      |                |                                                            |                                                                                                                            |                                                                                                  |                                                                            |
|------|----------------|------------------------------------------------------------|----------------------------------------------------------------------------------------------------------------------------|--------------------------------------------------------------------------------------------------|----------------------------------------------------------------------------|
|      |                | p.Arg74Ter                                                 |                                                                                                                            |                                                                                                  |                                                                            |
| 7899 | <i>CAPN3</i>   | chr15:42411343G>C, c.2419G>C; p.Glu807Gln                  | Muscular dystrophy, limb-girdle, autosomal dominant 4                                                                      | Heterozygous deletion                                                                            | Excluded muscular dystrophy                                                |
| 7918 | <i>BSG</i>     | chr19:581510G>C, c.361G>C; p.Gly214Arg                     | Blood Group OK                                                                                                             | Heterozygous missense                                                                            | Not tested                                                                 |
| 7934 | <i>ASH1L</i>   | chr1:155479920G>A, c.2950C>T; p.Arg984Cys                  | Intellectual developmental disorder, autosomal dominant 52                                                                 | Heterozygous missense                                                                            | Cannot exclude intellectual disability                                     |
| 7803 | <i>ADGRV1</i>  | chr5:90811123C>A, c.2846C>A; p.Ala949Glu                   | Usher s: hearing loss and retinitis pigmentosa                                                                             | Heterozygous loss (Febrile seizures)?, Biallelic loss (Usher s.)                                 | No evidence of hearing or vision loss                                      |
| 7889 | <i>CUL3</i>    | chr2:224478199C>T, c.2175+1G>A; splice site lost           | Pseudohypoaldosteronism, type IIE<br>Neurodevelopmental disorder                                                           | Splice site variants (pseudohypoaldosteronism); Haploinsufficiency (Neurodevelopmental disorder) | Cannot exclude neurodevelopmental disorder                                 |
| 7901 | <i>CNTNAP1</i> | chr17:42690144T>G, c.1792T>G; p.Phe598CVal                 | Hypomyelinating neuropathy, congenital, 3; Lethal congenital contracture s. 7                                              | Biallelic loss                                                                                   | Lacks features of hypomyelinating neuropathy or contractures               |
| 7905 | <i>DPYSL2</i>  | chr8:26644084A>C, c.1103A>C; p.Lys332Thr                   | Intellectual disability and dysmorphic features(?)                                                                         | Heterozygous missense                                                                            | Cannot exclude evidence for intellectual disability or dysmorphic features |
| 7918 | <i>SCRIB</i>   | chr8:143803792C>T, c.3026G>A; p.Arg1091Gln                 | Craniorachischisis                                                                                                         | Haploinsufficiency                                                                               | Lacks features of craniorachischisis                                       |
| 7944 | <i>EP300</i>   | chr22:41178614TCTC>T, c.6904_6907delTCTC;p.Leu2303Profs*49 | Menke-Hennekam s. 2, Rubinstein-Taybi s. 2                                                                                 | Heterozygous missense                                                                            | Excluded Menke-Hennekam or Rubinstein-Taybi s.                             |
| 7540 | <i>DHCR7</i>   | chr11:71435428A>G, c.1375T>C; p.Trp427Arg                  | Smith-Lemli-Opitz s.                                                                                                       | Biallelic loss                                                                                   | Lacks Smith-Lemli-Opitz s. features                                        |
| 6293 | <i>TTC26</i>   | chr7:139189388C>T, c.1228C>T; p.Arg410Trp,                 | Biliary, renal, neurologic, and skeletal s.                                                                                | Biallelic loss                                                                                   | Lacks biliary or renal features                                            |
| 7542 | <i>PLG</i>     | chr6:160722467C>T, c.1156C>T; p.Arg386Ter                  | Angioedema, dysplasminogemia, plasminogen deficiency                                                                       | Heterozygous gain of function or biallelic loss                                                  | Lacks features of angioedema                                               |
| 7525 | <i>PCK2</i>    | chr14:24103719C>T, c.1276C>T; p.Arg426Trp                  | PEPCK deficiency, mitochondrial                                                                                            | Biallelic loss                                                                                   | Lacks features of hypoglycemia or liver                                    |
| 7546 | <i>LAMA3</i>   | chr18:23912880A>T, c.3923A>T; p.Asp1308Val                 | Epidermolysis bullosa                                                                                                      | Biallelic loss                                                                                   | Lacks features of epidermolysis bullosa                                    |
| 5686 | <i>HECTD4</i>  | chr12:112179032:G>C, c.11256C>G; p.Tyr3752Ter              | Neurodevelopmental disorder with seizures, spasticity, and complete or partial agenesis of the corpus callosum (NEDSSC s.) | Biallelic loss                                                                                   | Excluded NEDSSC s.                                                         |
| 5801 | <i>TBXAS1</i>  | chr7:140015737C>A, c.1244C>A; p.Ala415Glu                  | Ghosal hematodiaphyseal s.                                                                                                 | biallelic loss                                                                                   | Excluded Ghosal hematodiaphyseal s.                                        |
| 5343 | <i>PAX3</i>    | chr2:222232203G>A, c.667C>T; p.Arg223Ter                   | Waardenburg s.                                                                                                             | Haploinsufficiency                                                                               | Meets clinical criteria for Waardenburg s.                                 |
| 5655 | <i>MYBPC3</i>  | chr11:47349785G>A, c.643C>T;                               | Cardiomyopathy, dilated, 1MM<br>Cardiomyopathy, hypertrophic,                                                              | Haploinsufficiency or biallelic loss                                                             | Excluded heart defect                                                      |

|      |               |                                                                 |                                                                                   |                                                                     |                                                              |
|------|---------------|-----------------------------------------------------------------|-----------------------------------------------------------------------------------|---------------------------------------------------------------------|--------------------------------------------------------------|
|      |               | p.Arg215Cys                                                     | 4<br>Left ventricular noncompaction<br>10                                         |                                                                     |                                                              |
| 5560 | <i>GRIA3</i>  | chrX:123417592T>C, c.1691T>C;<br>p.Ile564Thr                    | Intellectual developmental disorder, X-linked s., Wu type                         | Hemizygous mutations                                                | Cannot exclude intellectual disability                       |
| 5462 | <i>CYB561</i> | chr17:63438215G T>G, c.13delA;<br>Thr5Glnfs*8                   | Orthostatic hypotension 2                                                         | Biallelic loss                                                      | Lacks evidence for orthostasis                               |
| 7218 | <i>ZSWIM6</i> | chr5:61332835C>A, c.563C>A;<br>p.Ala188Asp                      | Acromelic frontonasal dysostosis or NEDMAGA                                       | Heterozygous p.R1163W or p.R913X missense                           | Excluded acromelic frontonasal dysostosis                    |
| 6924 | <i>VWA8</i>   | chr13:41887322G>C, c.691C>G;<br>p.Arg231Gly                     | Retinitis pigmentosa (?)                                                          | Heterozygous missense                                               | Excluded retinitis pigmentosa                                |
| 7164 | <i>VPS50</i>  | chr7:93291790G>T, c.1030G>T;<br>p.Glu344Ter                     | Neurodevelopmental disorder with microcephaly, seizures, and neonatal cholestasis | Biallelic loss                                                      | Excluded cholestasis                                         |
| 7073 | <i>VPS13C</i> | chr15:61946374G>A, c.794C>T;<br>p.Thr265Ile                     | Parkinson disease 23, autosomal recessive, early onset                            | Biallelic loss                                                      | Excluded Parkinson disease                                   |
| 7226 | <i>TIAM1</i>  | chr21:31146924T>G, c.545A>C;<br>p.His182Pro                     | Neurodevelopmental disorder with language delay and seizures (NEDLDS)             | Biallelic loss                                                      | Cannot exclude neurodevelopmental delay                      |
| 6972 | <i>SPEN</i>   | chr1:15928231AC>A, c.1992delC;<br>p.Gln665Lysfs*144             | Radio-tartalgia s.                                                                | Haploinsufficiency                                                  | Cannot exclude Radio-tartalgia s.                            |
| 7227 | <i>POGZ</i>   | chr1:151406022G>A, c.2827C>T;<br>p.Arg943Cys                    | White-Sutton s.                                                                   | Haploinsufficiency                                                  | Cannot exclude features of White-Sutton s.                   |
| 7158 | <i>PEX3</i>   | chr6:143489224T>C, c.1120T>C;<br>p.*374Arg (Loss of stop codon) | Peroxisome biogenesis disorder (Zellweger s.)                                     | Biallelic loss                                                      | Excluded Zellweger s.                                        |
| 7223 | <i>KDM5B</i>  | chr1:202749126C>T, c.1700G>A;<br>p.Arg567Gln                    | Intellectual developmental disorder, autosomal recessive 65                       | Biallelic loss                                                      | Cannot exclude intellectual disability                       |
| 7013 | <i>IRS1</i>   | chr2:226796947G>GC,<br>c.1791_1792insG;p.His598Alafs*13         | Type 2 diabetes mellitus, susceptibility to                                       | Haploinsufficiency                                                  | Excluded type 2 diabetes                                     |
| 7217 | <i>IRS1</i>   | chr2:226796947G>GC,<br>c.1791_1792insG;p.His598Alafs*13         | Type 2 diabetes mellitus, susceptibility to                                       | Haploinsufficiency                                                  | Excluded type 2 diabetes                                     |
| 7191 | <i>GRHL2</i>  | chr8:101619557T>C; c.1448T>C;<br>p.Cys373Arg                    | Corneal dystrophy, Deafness, autosomal dominant 28, Ectodermal dysplasia/short    | Heterozygous (corneal dystrophy, deafness); homozygous (ectodermal) | Excluded corneal dystrophy, deafness or ectodermal dysplasia |

|      |               |                                                                                               |                                                                                                                               |                                                                             |                                                                   |
|------|---------------|-----------------------------------------------------------------------------------------------|-------------------------------------------------------------------------------------------------------------------------------|-----------------------------------------------------------------------------|-------------------------------------------------------------------|
|      |               |                                                                                               | stature s.                                                                                                                    | dysplasia)                                                                  |                                                                   |
| 7119 | <i>FREM1</i>  | chr9:14801790T>G,<br>c.3556A>C;<br>p.Ser1186Arg                                               | Bifid nose with or without<br>anorectal and renal anomalies;<br>Manitoba oculotrigoanal s.;<br>Trigonocephaly type 2          | Biallelic loss;<br>Haploinsufficiency;<br>(Trigonocephaly only)             | Cannot exclude<br>trigonocephaly                                  |
| 6985 | <i>FEM1C</i>  | chr5:115524327A><br>G, c.1835T>C;<br>p.Phe612Ser                                              | Developmental delay, pyramidal<br>signs, and limb ataxia (?)                                                                  | Heterozygous missense                                                       | Cannot exclude<br>developmental delay                             |
| 7202 | <i>DCX</i>    | chrX:111401096T><br>C, c.599A>G;<br>p.Asn200Ser                                               | Subcortical laminar heterotopia                                                                                               | Heterozygous missense                                                       | Cannot exclude features of<br>subcortical laminar<br>heterotopia  |
| 7002 | <i>DAG1</i>   | chr3:49531270G>G<br>A, c.759_760insA;<br>p.Asn254Lysfs*20                                     | Muscular dystrophy-<br>dystroglycanopathy                                                                                     | Biallelic loss                                                              | Lacks features of muscular<br>dystrophy                           |
| 7071 | <i>CLTC</i>   | chr17:59666977G><br>A, c.2140G>A;<br>p.Gly714Ser                                              | Intellectual developmental<br>disorder, autosomal dominant 56                                                                 | Haploinsufficiency                                                          | Cannot exclude intellectual<br>disability                         |
| 6966 | <i>BRAT1</i>  | chr7:2543876C>T,<br>c.369G>A;<br>p.Trp123Ter                                                  | Neurodevelopmental disorder<br>with cerebellar atrophy and with<br>or without seizures; rigidity and<br>multifocal seizure s. | Biallelic loss                                                              | Lacks features of cerebellar<br>atrophy or seizures               |
| 6950 | <i>ADRA2B</i> | chr2:96115933C>G<br>, c.217G>C;<br>p.Glu73Gln                                                 | Epilepsy, familial adult myoclonic                                                                                            | Heterozygous in frame<br>insertion/deletion                                 | Cannot exclude myoclonic<br>epilepsy                              |
| 7123 | <i>LEMD3</i>  | chr12:65169828GC<br>CGCGGGACCAGC<br>>G,<br>c.233_245delCCGC<br>GGGACCAGC;<br>p.Arg78Glyfs*101 | Buschke-Ollendorff s.<br>Osteopoikilosis with or without<br>melorheostosis                                                    | Heterozygous deletion/insertion,<br>duplication, frameshift,<br>missense    | Cannot exclude Buschke-<br>Ollendorff s.                          |
| 7155 | <i>TBXT</i>   | chr6:166160836,<br>c.1034+1G>C Loss<br>of splice site                                         | Sacral agenesis with vertebral<br>anomalies                                                                                   | Biallelic loss                                                              | Lacks features of sacral<br>agenesis                              |
| 7157 | <i>UBIAD1</i> | chr1:11285729C>G<br>, c.258C>G;<br>p.Ile86Met                                                 | Corneal dystrophy, Schnyder<br>type                                                                                           | Haploinsufficiency                                                          | Lacks features of corneal<br>dystrophy                            |
| 5943 | <i>SQOR</i>   | chr15:45661973A><br>G, c.253A>G;<br>p.Ile85Val                                                | Sulfide quinone oxidoreductase<br>deficiency                                                                                  | Biallelic loss                                                              | Lacks features of<br>sulfide:quinone<br>oxidoreductase deficiency |
| 5980 | <i>SEC31A</i> | chr4:82854963:TC><br>T, c.1146delG;<br>p.Trp382Ter                                            | Halperin-Birk s.                                                                                                              | Biallelic loss                                                              | Excluded Halperin-Birk s.                                         |
| 6686 | <i>KRT83</i>  | chr12:52314788C><br>A, c.1325G>T;<br>p.Cys442Phe                                              | Erythrokeratoderma variabilis et<br>progressiva 5                                                                             | Biallelic loss<br>(Erythrokeratoderma);<br>Haploinsufficiency (Monilethrix) | Lacks skin defects                                                |

|      |               |                                                   |                                                                                                           |                    |                                                        |
|------|---------------|---------------------------------------------------|-----------------------------------------------------------------------------------------------------------|--------------------|--------------------------------------------------------|
| 6692 | <i>HR</i>     | chr8:22120753C>A,<br>c.2573G>T;<br>p.Gly858Val    | Alopecia universalis<br>Atrichia with papular lesions                                                     | Biallelic loss     | Lacks features of alopecia universalis                 |
| 6707 | <i>DNAH11</i> | chr7:21801213A>C,<br>c.10310A>C;<br>p.Glu3368Ala  | Ciliary dyskinesia, primary, 7,<br>with or without situs inversus                                         | Biallelic loss     | Lacks features of ciliary dyskinesia or situs inversus |
| 8867 | <i>PREPL</i>  | chr2:44339179G>C<br>, c.670C>G;<br>p.Leu224Val    | Myasthenic s, congenital, 22                                                                              | Biallelic loss     | Lacks features of myasthenia                           |
| 8828 | <i>PAX3</i>   | chr2:222297081G<br>>T, c.218C>A;<br>p.Ser73Ter    | Waardenburg s.                                                                                            | Haploinsufficiency | Meets criteria for Waardenburg s.                      |
| 8828 | <i>INF2</i>   | chr14:104713537<br>C>T, c.2971C>T,<br>p.Arg991Trp | Charcot-Marie-Tooth disease,<br>dominant intermediate E with<br>Glomerulosclerosis, focal<br>segmental, 5 | Haploinsufficiency | Excluded Charcot-Marie-Tooth or glomerulosclerosis     |
| 8861 | <i>GRHL3</i>  | chr1:24342238,<br>c.892C>T;<br>p.Arg298Cys        | van der Woude s. type 2                                                                                   | Haploinsufficiency | Cannot exclude van der Woude s. type 2                 |

1446 **Supplementary Table 1. Phenotypic expansion of MM genes with DNM displaying**  
1447 **syndrome and/or non syndrome disease features other than MM.** Column 1: Family  
1448 number, Column 2: mutated gene, Column3: Mutation identified for that gene and patient  
1449 in our cohort, Column 4: Relevant OMIM entry for each gene. Column 5: type of  
1450 mutation reported in OMIM leading to phenotype. Column 6: Evidence for or against  
1451 concordance with the OMIM phenotype. Genomic coordinates are in hg38. s.: syndrome,  
1452 question mark (?): association remains uncertain according to OMIM.

## 1453 **Supplementary Notes**

1454

### 1455 ***Power calculations for effect size***

1456 To determine the adequate cohort size for identification of recurrently mutated genes in  
1457 MM, we developed a computational model and power calculations to estimate effect  
1458 size<sup>77,78</sup>. We first determined that with a sample size of 350 trios, observing such  
1459 recurrence in two families would be significant genome-wide, with  $P$  value = 0.003, and  
1460 from this calculated the false-discovery rate (FDR), assuming a baseline DNMM rate  
1461 among the ~20,000 human genes (**Extended Data Fig. 1** gray dashed line). Then,  
1462 leveraging data from a small NTD WES study in which DNMM LOF mutations were  
1463 identified in 20% of subjects, 34, and estimating that about 0.4% (i.e. 80/20,000) of gene  
1464 knockouts in mouse show a MM-like phenotype, we estimate that there are 50–100 MM  
1465 disease genes ( $k$ ) to be discovered. Borrowing from previous literature<sup>13,21,79</sup>, we  
1466 anticipate that LOF variants will be enriched in patients vs. controls with a  $v$  ratio  
1467 between 1.5 and 2.5. We ran 10,000 iterations to estimate the number of genes we will  
1468 discover for various cohort sizes ranging from 100–1000 trios (**Extended Data Fig. 1**).  
1469 For instance, with a cohort size of 400, if there are 50 genes to discover (i.e.  $k = 50$ ) and  
1470 with 2.5 times as many LOF variants in patients vs. control (i.e.  $v = 2.5$ ), we expect ~16  
1471 recurrently mutated genes to emerge. For the same cohort, if  $k = 100$  and  $v = 1.5$ , we  
1472 expect to discover ~2 recurrently mutated genes. Given the recurrence found in the cohort  
1473 of 43 trios<sup>15</sup>, and our preliminary data, we anticipated our results will fall between these  
1474 two scenarios. Notably, this model predicts that with 800 MM trios sequenced as we  
1475 propose here, we expect to discover ~5–10 recurrently mutated MM genes.

1476

### 1477 ***Reproducible prediction of D-Mis-HC***

1478 To validate the high confidence damaging missense variant (D-Mis-HC) that was  
1479 originally called by MetaSVM, we also applied MetaLR and REVEL to the DNMMs. The  
1480 D-Mis-HC was highly reproducible with the two additional annotation tools with  
1481 recommended thresholds, MetaLR score > 0.5 and REVEL > 0.75 (**Extended Data Fig.**  
1482 **16c-16d**).

1483

### 1484 ***Parents' age of conception comparison***

1485 To confirm if the excessive DNMM burden in MM compared to controls are independent  
1486 from the ages of parents at the time of conception, we gathered dates of births from  
1487 probands, fathers, and mothers. Trios that were able to track all information from three  
1488 family members (MM: 79, control: 683) were collected, to compare the ages of  
1489 conception of father and mother, with Wilcoxon rank-sum test. (two-sided). We could  
1490 clearly confirm that both the ages of mothers and fathers in the MM cohort were  
1491 significantly lower than those of controls (**Extended Data Fig. 2a**). Although the rate of  
1492 de novo variants is known to be highly correlated with the age of parents, the excessive  
1493 burden observed in our study is not derived from the difference of fathers' and mothers'  
1494 age distribution.

1495

### 1496 ***WGS evaluation for DNMMs contributing to MM risk***

1497 From 101 additional trios and 1 quartet, we observed comparable de novo SNV and Indel  
1498 rates with WGS data (**Extended Data Table 1**). Among them, 13 LGD and 39 D-Mis

1499 coding DNMs were observed. Also, 9 splicing disrupting variants (SpliceAI maximum  
1500 delta score larger than 0.9) and 41 possible pathogenic noncoding DNMs (GREEN-  
1501 VARAN level 4) were collected. However, there was no recurrent gene mutated within  
1502 the WGS cohorts (see **Supplementary Data** for the full list of DNMs in WGS). Instead,  
1503 three overlapped with damaging (LGD+D-Mis) DNMs with WES data were revealed: a  
1504 stop-gain in KDM1A, a splice donor gain in ITPR3, and a variant in GRHL2 enhancer.  
1505 We could find four de novo CNVs (> 100 kb) in WGS trios, four de novo deletions and  
1506 duplications were observed (**Extended Data Table 2**). The large CNVs were confirmed  
1507 with the parents' sequence data (**Extended Data Fig. 3b**) and the duplicated or deleted  
1508 regions were not recurrent. No de novo translocation or inversion was observed.

1509

### 1510 ***Multiplexed Error Robust In Situ Hybridization (MERFISH) spatial transcriptomic*** 1511 ***expression pattern of a subset of DNM genes***

1512 We conducted Multiplexed Error Robust Fluorescent In Situ Hybridization (MERFISH)  
1513 on the Vizgen platform using the methodology as described in Methods<sup>64</sup>. We segmented  
1514 a total of 352,729 cells with uniform transcript density using cell segmentation. A subset  
1515 of cells was excluded due to outlier cell volume ( $n = 9,922$ ) or transcript density ( $n =$   
1516  $21,319$ ), with the remaining cells divided into 63 distinct clusters based on gene  
1517 expression using the Leiden algorithm, stratifying into 7 major cell types (Neuron, Neural  
1518 crest, Neural Progenitor, Dorsal Root Ganglia, Pre epithelial to mesenchymal transition  
1519 neural Crest progenitor, Mesoderm and Blood) in mouse E9.5 parasagittal sections. Cell  
1520 types were defined by expression of marker genes selected based on previously published  
1521 single cell transcriptomic studies<sup>65-67</sup>, employing ScType<sup>80</sup> for unbiased cell typing from  
1522 marker gene expression. Approximately 14% cells were flagged as 'indeterminate' type  
1523 that could not be clearly categorized, likely due either to a state of transitioning between  
1524 cell types or lacking expression of marker genes. We selected 36 DNM genes identified  
1525 in MM subjects for multiplex spatial co-expression analysis (**Extended Data Fig. 4**).  
1526 Percentage of gene expression vs cell type revealed that most of the candidate DNM  
1527 genes show expression in multiple cell types during neural tube closure. There were some  
1528 genes like *Rnd2* and *Add2* that were expressed predominantly in neural cells, *Celsr1* in  
1529 neural progenitor, *Stab1* in pre-EMT-neural precursor cells, *Opalin* expressed in  
1530 predominantly in blood (**Extended Data Fig. 5**).

1531

### 1532 ***Additional evidence for role of functionally implicated DNM genes in NTDs***

1533 The DNM genes in which the DNM mutation impairs protein function showed additional  
1534 prior evidence that may suggest a role in human NTDs. TIAM1, which promotes actin  
1535 assembly via the Arp2/3 complex<sup>81</sup>, is essential for neural tube closure in mice<sup>82</sup>, but not  
1536 previously implicated in human NTD. TNK2, also known as ACK1 is a kinase associated  
1537 with CDC42 that controls cellular protrusions associated with spinal neurulation in  
1538 mouse<sup>32</sup>. VWA8 is a mitochondrial matrix-targeting ATPase, and notably mitochondrial  
1539 dysfunction is implicated in both genetic and environmental murine models of NTD<sup>49,83</sup>.

1540

### 1541 ***Clinical phenotypes of patients compared to OMIM***

1542 We assessed possible connections between DNM genes and associated OMIM  
1543 phenotypes by recontacting subjects to inquire about clinical features listed in OMIM but  
1544 possibly not described at the time of enrollment into our study. Resources used were



1545 Online Mendelian Inheritance in Man (OMIM), ClinVar, and PubMed. Out of the 192  
1546 DNMs found in our cohort 82 were found to have other OMIM phenotypes (43.8%).  
1547 Genes found to have other OMIM phenotypes in individual families/subjects were further  
1548 reviewed regarding the type of mutation compared with those reported in the clinical  
1549 literature and compared with clinical status (**Supplementary Table 1**). Information  
1550 available at the time of enrollment was used for clinical correlation along with follow up  
1551 with the families via telephone or zoom to specifically inquire about features related to  
1552 the published OMIM phenotypes. For some subjects like 6695, the de novo mutation  
1553 occurred in a gene showing only recessive inheritance (*TIMM50*), so it was not surprising  
1554 that the MM subject carrying a DNM in the gene did not report features of the OMIM  
1555 entry. But for other subjects like 6313, the DNM occurred in a gene with the same or  
1556 similar zygosity, and the patient showed features that cannot be distinguished from the  
1557 reported OMIM entry, in this case Coffin-Siris features (i.e. developmental disability,  
1558 abnormalities of the fifth (pinky) fingers or toes, and characteristic facial features),  
1559 suggesting MM may be a phenotypic expansion of this syndrome.

1560

#### 1561 ***Estimation of number of genes in DNM contributing to MM risk***

1562 The estimation was based on previous publication<sup>14</sup>. Briefly, the total number of risk-  
1563 associated genes ( $C$ ) is calculated with the number of observed risk-associated mutations  
1564 ( $d = 192$ ) and recurrent mutations ( $r = 5$ , *PAX3*, *IRS1*, *ZSWIM6*, *BRSK2*, and *VWA8*).  
1565 Since 28.26% of the damaging DNMs (LGD + D-Mis) are contributing to the MM risk,  $d$   
1566 and  $r$  were normalized as 54.26 and 1.41. The number of observed risk-associated genes  
1567 is  $c$  and  $c_1$  refers to the number of genes mutated once and the probability of a newly  
1568 added mutation hitting a previously mutated gene ( $\mu$ ) could be calculated as follows.  
1569 Considering the variation in effect size of individual DNMs are assumed to be 1 to  
1570 minimize underestimation of set size,  $C$  could be estimated as 2,021 genes.

1571

1572

$$c = d - r$$

1573

$$c_1 = d - (2 \times r)$$

1574

$$\mu = 1 - c_1/d$$

1575

$$C = \frac{C}{\mu} + (g^2 \times d \times (1 - \mu)/\mu$$

1576
